# Supplementary material
Source: PubMed Central journal article supplement (PMC1323176)
Supplement: pnas_0507902102_1.pdf [file pnas_0507902102_1.pdf]

**Key:** GGACATTTT 5' UPSTREAM

ACTTTGTG 5' EXON UNTRANSLATED

ATGCTTGGC EXON PROTEIN CODING

GTGAGTGAT INTRON

**CACGTG** CONSENSUS E BOX

**CATGTG** NONCONSENSUS E BOX (BOTH ORIENTATIONS)

(C/G)(A/T)**GGGGGC**(A/T) MOTIF A (EGR1-LIKE REVERSE  
COMPLEMENT)

**GGGGTGGGG** MOTIF B (EGR1-LIKE)

**CCTCTGCCTCC** MOTIF C (WT1-LIKE)

### Adam8 :

GGACATTTTCTCAGTTGGGGTTCCTCTTCTAAAATGACTCCGGCATGTATGAAATTGACA  
TAAGTCTAGCCAGCACAACTTATATTTAAATGCTGGGTGTAGTGGGACACTTCTCTATT  
CCCAGTGCCTGGGGGTACAGGTAGGTGGGTTCCTAGGGCTTGCCTGGCCAACCAGTCTAGAT  
GAATCATGAGCTCCATGTTTCCAGGGAGAGAGCTATCTCAAAAATAAAACCAATAAAATTA  
GGAGTGGGGAGTCAGGAAATAGTCTAGTGTCACTCTCAGCTC**CACATG**CACAAACAC  
GGGCACACACAGTATGTACTGAACCTCAACAACAAGAATAAACATGCAAGCTGCCGTGAA  
CCACAGGAAGGTCTCCCAGACATAACTGTTTGACTTTAAAGTCCCTGTGTGTGTGACT  
TAACTGTTTGCCTTTAAAACCTAGTGAGAGTGTGCGTGTGTTTGTGGTA**CATGTG**GGGGC  
GTGGGGGATCCTTTTTGCCTCAAAGACAAAGTATTTGTGCGAGGAGCAATATAATTGGAA  
AAAGCCATGTAGAGCCTGGGGGTGGGAACTGTACCTATTTAGAGGTTGCCTTTGTGTGCA  
CCACTAGGGGGCAGCATTGTTCTAACTGAAAATACCCCTCACTCAACCAATGTATCCCT  
AGACTTCACCAAGAACCCTTAAGGTTTACCCTTGAGGAATATCCTTGAAGACAGGCTA  
GGCTTCAAGCCAAAAGCTGTTCTTGCCAGAACTGGGTCTGGCTGGCCTTTGTTTGATAA  
CTGGCCTTGCTTTTTGGAAATTACTTAGCAAAGTGGCTAACAAAGCTTTGTTGTAGCTACC  
TTGTCTCAGAGTGGCTTTCTGCTTCAGTCTGAGAGTGGGCAATATGTCTACCCTTGACATGA  
TACACCCTTGCTCCAGGGTGGTCTAGTCTAGCTAAACTATATAAATA**CACGTG**TCCTTTA  
CAGAATCCAGTTTTAAACACCTGCCCTAGGAGGGTCTGGGGAGTGAGGAAGTGTTTGGAG  
GAATGACAAGTAGAGGCAGCCCTTGCTATTGGCTCTATGTAGATGTATATGTTGGGTGC  
CTGGTCCAGGACTGGCTCGCTAAGTAG**AGC**CCCCAGCCCCTTTCCTGGGGTGTCTGGTTC  
TCAACCACACAGTTTTCTTCTGGTCTGCAGCATGTCCAGGCTTGCCTTAGTAAACATCTAT  
CTGACAACCCAGCATTGTTAGAATGAATGCTACACCGAGCAGAGGAGCTTACCCTGCCTGT  
CTCCAGGAGCCCAGAAAGCCATGTCCCTGGACGATGACCTGCAGCTCCCAGGTTTGTGTG  
GGGTGCAGCTCCAAACTCAAAATAACCTGCTGGGTGAAAGTTAGGAGTAAGTTGAGTCT  
GTCTTTTCTGTAGTGGAGTGTGTAACCATATTCCAATGTATTTCTGCCAGTGTGAGACAA  
AATTCGCCCTACTTGGTCCCAATTTTTGATTATACAACCTGTCTCCATCTTCACTATGGG  
CAGTTGGACTTACAAGACAATGGTTGCTACTGGCAACAGGTTTTGATTTTGCCTTTGATT  
TGACTAAGAACACATTTCTTGAACCTTTGCTGTACCTAACTTGCAGTGTAAAGATATT  
TAAGATCCTGTGTATGTGGAAGTCAGCCTTACCCGAGAGCTCTGGCTGCTGCCCTACCTAT  
TACAGCCTCGCAGTGAACACTGTGCTGATGCCTCAGGCAGCGGGTTGCTGCTGAGATTCC  
TAAGCCATTGCTACATTTCTGACCTTATCCACAAGGGTAGAAGAGTGACAGTAG**CATGTG**  
TGCCCCAGCTTAAATTTCTAGGTACGATCTAAGTACTCAACCCCAACCCCTGTAGTTTCCCA  
TTATGGTCCAGCTGTGAGGCTCTGTTGGTAAAGTTGGGTGCTTCCCTTCTTGGGTTA  
CTTATCCCTTGTGGGGTAGAACTGTAAAGTCTGTGAGGCTGACCCACAGCTGTGCCACA  
AGGATGTATAGCGAACAGTGCCACAAATAATAAACAGGCGTGACTACATTTCCCAAGTGCC  
CTGGGTTCCACAGTAACAGACCCACCTGGAGAAGCTGGAAGCCAGGCCATGGTAGGGGT  
GCTGAGAGCTCTGGCTCTGAGTCACTACCTGAGGACATGAAAGACAGAATCCAGGA  
AAGGAGCCTGGTGCCTCGGGACCCCTAACAGGTTAGGTAGGACCTCAAAGGATCAGTCA  
GGGGCTGGCGAGATGGCTCAGTGGTTAAGCACGCGCACTGCTCTTCCGAAGGTCCCAAG  
TTCAAATCCCAGCAAC**CACATG**GTGGCTCACAAACCATCTGTAATGAGATCTGATGCTGT  
TTCTGGAGTGTCTGAAGACAGCAACAGTGTACTTACATATAATAAAATAAATAAATCTTAA  
AAAAAAGGATCAGTCAGGTTCTCCCTGCATATGCCTCTCCAGTGAGGCCTCAG  
AAGCCTCGTGGAGCCGGGCAGGAGCTTTGGGAATGTCACTCCCACAAGTTGGTCTGGG

CCACACTGCCTTTCTTGCCTCTGTCTGCATCTTTCAAGTGCCAGAAAGTCAAAGGGT  
CCCTTCTGAAATTTTCAGGCTCATAAGTCACTTCCCCTCCAAAAGTCATCTTCTCCAGCT  
AGACTCCACCCAGTTAGCACTCCCAAAGCTCTGCCATGGGAGGCAATCCACAATCTCCC  
CACCAGGACTGGGAGCTTGTAGAAGTGCAGAGTTGCTCAAATTTGGTCTGTTTACCATCTC  
CATCTCCCATGAATTTTGTCCAAAATCATGGGAGATCAATAGGAGCTACCTAGAAGTTAC  
TTCGGAGGGCCCTGTAACTCCAGACTGCCCTGGAGGCTGGTTGCTGCCAACTGGGTGT  
TGGTATAGAGGTGTGTACTTCTTGCCCCCTTGCCTCCGCCCGGTCAGTCCAGTATGGC  
CAGTTCCGATCAGTGGGAAGGGCACTCAGAAAGAAGTACCAGGCCAGTGAAGAGAGT  
ACTTTGTGGAACCTCTAGGGTTAGTGTGCTCCAGATCCCATCATGCTTGGCCTCTGGCTE  
CTCAGCGTCTTATGGACACCAGGTGAGTGATGACTACTTGTATTTCAAGGAGCCTATTTCAT  
TGCTTGGTGGTGTGCCTAGTGGCCATGTACCATGATCAGCTCACCTTGCTCCCTGGAGT  
TGGTCTGGTCCCTGGGTATGGAGAAAGTAGGTAGGAACAGAAAAGTCAGAATTGAGATT  
TTTTTTTTTTTTCAAAGTGAATGTGAGAGAAATTGTTTCTGGGATTTTTCTTTTTTCT  
ATTGAGCTAGTTACAGGAACAGTAGTACATCACTAGGCGTGGCATTACAGGACAGCTT  
CCCTTGTCTGTAGGACTCCAGGCACAGGTTCACTTTGGGATCCTGGGGATGCA  
TAACTCTAGCTAGGCGGGGACAGAAGCTAGAGGCACGATGGTCCCAGTTCTCTAGCAGCA  
TGGGATCCTGCCTCCCCTGGGAGGCTTGGTTTTCTGTCTGGGAGGACCCTGGCTGGA  
GTGGTCTCTTCTTACCTCTCAACCTGGGGTTAAGTGGCTGTGCCCTTGCTTATGCA  
AGAGATCAGCAGGTGGTCTCTAAAAGTGGACCTGCCACAGATAGGTGCTCTCTAAACCA  
GTCCCCCATCAGTTGTTGAGCAGGAAGTTTTCCGGTGGGAGAGAAAAGCCTGAGGGAGGG  
TGTGTGTTTCATCAGTTAGCTACGATCATGCTAGCTAAGTTCAACTCTAGATGTCTGGCAG  
CAGACCATAGGCCCTAATGTTCTGTCTGTAGTTCAAAAGCAGCACTGGGAAGGG  
TGGGTGAGTGGATGAGTTCTTCTGGGGCACTGTGCCCAGGTGTGCTGGGCTCAGACA  
GCTTGACTCTGGTGTGATGGAGCTGGTGGTTAGGCACAAAGCTCTTATCTGGCCATGG  
GGTCAGATCCCATTGCTGGCACTGAGCCTTGTGGTGAATA

**Aim1:**

AAGCGGCTGCGGGGCTCCAGGCCGTCTAGTCTGACCACATACTGTAATGTGGCTTCTGA  
GACATGAGCTCCTGCTTCAAACCCAGGCCCTTGTCAACAGCTAGGTGACCTCAGAGGAGTC  
ACCTACCTTCTCTAGGTCTCAGCTTCTCTCTTTAGAAAAGAAGCAGGCAAGTTGTACATT  
GGGTAAACCAAATTAATAACTTCCCAAGTGCTTGGCAAACGGTGGTTTTTCATTTGGCTA  
CAAACCTGACAAGCTCCTCTGCCTGCTGAGGAATGTTTATATAAAAATGGTTCATAAAAC  
AAAAAAGTGGGAGTGGCTCTGTCTGAAAGCAGCCATGGGGAGCCTTCTGGTCTGTAGCC  
TCTGTTAGCCCTCAGTGTAAACCCCTTAAGGGGACTTCCAAAATTCCTTAACCATAAGTT  
TTGTGTGAAATAAAAACTAATTCTGTTCTAAATATGTAGGGGTTTTGTTTTGTATTACC  
TTTTAAGTTACAGATACAAAAGAGACAAATGGGCCAGATATGTGAAATGCCTTGGCTAAA  
TTCACACAGATATTAGTGTGAGAGCCAGGACTGAGGCAAGGCAGGCAAAATGCCAACACA  
ACACATCTGCTATTGTGAAAGAACACATTTGTGTACACTAAAGACATTAATCCAGTAAT  
AAGTAATTAGACCTAAGAAATGTGAATGAGCTGGGAGACTCTGCCCTAGACACATTAACA  
AAGTCAGTTAACAAATTTATGGTATAGCCGTATGGTTAAAAAATTTGCTTCTACTAATGTT  
TGTGTAATAATCCAAGGAAGTCAGTCTTAGGACCCCTGGAAGTTATAATGTAACTCATCC  
TTTTGTCTTAGCAAAGGCAAGCAGCCAAGCAAGCCCTATGAAACTGCCATTTTCATTC  
TAGTAAAAATTTATGCATATGAAACCACTGGGAATAAGGCAGAATGCTGATGAGCAGCA  
GGTTTAGGAAAGATTTAAAAACATTTCCATGTTTCAGAGGGACAGCTCAGTGATACAGT  
GTGAGGACCTGAGACCCATAGAAAAGTGTGATGGGAATGAGTGTCTCTAATCCCAGTA  
TTCCCGTAGTGAGATGGAAGATGGAGCCAAAAGCTTGGCAGCTCCCAGACCTGACACC  
CTTGGGTGTGCAGTGTGAAACATCGAGAGACTGTCTCAGCAAAGTCGAACCTTGACACCC  
ATGGTGTCTCTGACTTCAACATGTCATGCATGCATAAATACTACTGCGCATTT  
AAAAATAGGGAAGGCATTAAGTATTTAAATTTGTTTCCCTTATACCTTGTAAATGCTGCCAG  
TTCAGTGCCACTCACTGTGAATGAATATGAATACTTGGTAAATTAATAGTTTCTTAGATT  
TATAGTCTCATCTGTCTATATGTAGGTAAGATACTTTATATAAAAAATATGTGCTAGTGT  
TGTAGGATTTGTTTAGGAAGTTTCTATGGGAAAGCAGATACACACCAGGGGATCGGCATTT  
GTGGTCTCTTGGCAGCTGGTTGTATGTCGACTTAAACACCAGGCTGCTAACTGCCCTGT  
TGCTTTGTCTTGCAGCCCCGCCAGACCCAAAATGTTGAACTAAATCTGAAAACTCCGA  
AGAATCCTGACAGTTTGGGAAATGAGCACAACCTCATTTAGCCAGCCAGTTCATAAGGGGA  
ACACAGCCAACAAAATCTCCTTATTTGAAAACAAGCGGGCTAACAGTACGCCCCGACCC  
CCGACGTCCGTAAACAAGGAACAATCCTCCTCTAGTAAGACATTTGTTGGGAGGGCGA  
AGCTGAACTTAGCCAAAAGGGCCAAAAGAAATGGAGCAACCCGAAAAGAAAAGCTGTGTCAA  
CCAGCCACCAGAATGGCCTGGTGGTCAAAGGCCACTCTGCAGAAAGGAAAGGACACAGCAG  
TCCCTTCCCCAGAGAAAGATTCGTCCAGCCACCAGAGGAGGGGAAGGAGATCCACCA  
AGGATCAGGTCCCTCCGCCCTGAGCCTGAGCAAAGTGATAAGCTGGATGTACAAACAGACA  
CTGCCTATCCTTCCCACCCAGGGCCACTGCTCTGGTTCTGTGAAGGACTCTGAGCTCT  
CAGGAGAGGGCCAGCCAGAGGCTGCTGACAGCAAAGGCCCCGTCTTAAACAACAAGTG  
ATGTTGCACAGGACATCGCTGCCATTTGTGATGCCAGAGAGGCTCCCCAAAGCCACAG

ATGCATTTTTCTGACTCACAGCCAGCTTTCAGCGGCTGAGTCAGCTAGGAGTCAATCTCTCC  
CGCCTTCTGCACCCATTTCTGTGGACGCTCCCCAAGATGGCTGTGTTCAAGTTCATAT  
GCAGTGTTCCTGCACCTGCTCTAGAAGTGTGAGAAAACCAACAATGGGTGTGTTTCGCCAG  
TCTCTCCTCACACTGAGAAAACCTCCCATCTCCAACCTGGAGTGGGAGAAGCCAGTCCCC  
CTTCCACTCCAGAGCACAGCCGAGAAACTATGGGGAAAGACTGTCCCTCCAAGTCCCTCG  
TCCAGGTCGGTCCCTTGTGCTTCCCGTGGAGAATCTCAGGATGTGAGTCTCAGGTCAT  
TCTCAGAGAGCTCTGAAGTTAGAGAGGCACAGCTGCCAAGCTGTCAAGCTAATGAGCCTG  
AAGTGGTGTCTGTCCACCCTTGTGTTCCGCAGCACGAGGATGCACCAGACACATCACCCA  
AGGACATCCATCACAGAGAAGGA**CATGTG**GCACAGTCTCGACCACACATCACACAGTCAG  
GACCTGAGAAGGCTCCGCCATCCAGAGCAGCAGTGGGATGCCCCAGACAGCGGAGTTC  
TCCTCACCCACTCTCCAGCAGCAGAAGTCTATGCAGAAGGCCCCCAAAGGCCAGGTCAAG  
ATGCGACCAGCCACTTACCCTACCAGGCTTTTGAACATTTCTGCTGGTAGTGACAATA  
GTGCTGTGATTTCTTCTTGATATGGAAAAATTTACTGAAATATTAATAAGATGGACA  
**GTGCAGTATGTGCCCCGAAAAAGAAGAAGGCCCGGGTCCCAAATCTCCAGCCCCCTC**  
**ACTTCGCTATGCCTCCCATTACAGAGGACAGTTTGGAAAAGGTGTTTGTATCCCAACGTGT**  
**TCACCATTGGTTTAGGGAAGAAGAAGGAAAGCCTGGCAGAGGTGTACCAGCTTTGCACT**  
**TGTTGCAGAACCCAGACCCCATATCCAACCTGAGAGCCAAGCGTGCATCCACCGAGCAGA**  
**GCATCGTCTTCAAGTCTTGCACACTAACAGTAATGGGAAGAGCGAGCCACAGACCCTT**  
**CAGAAGCAAGTGACAAGGAGAACAGGGACATCAACAGCGCGCGGTTAAGAGGTCACGGC**  
**TAGAAAAACAGCACGCTTTTCTCAAGCATGCTTTCTTCCCAACAGACAAAGTCTTTT**  
**CTCCCTCCGTGACGTCAGTCAACACAATGAGCACATCTTTTAGCACCTCAGAACAGCT**  
**CCGTATCTCAGTCATCAGTGGTACAGCCAGGAAGGAGGGTGGCCTGCCCTGTGGCTCAG**  
**ACAAAGAACAGCCACACCTTGCACCCCAACTCTTAAAGGTCTTCAATTTCAATTCAT**  
**CAAATACATCTCGTCTGGGTCCAGC**CACATG****GAAAAGTACCCACAAAAAGAGGGAAGCA  
AGGAAGATGTGAATTTCTCAGGGCAACCTACAATTTGCCAGAAAAACAACCTTTCAGACTTAC  
CCAACTGAAGAACAGCTGAGCGTAGGCGTGAAGGATTTCTGAAGTCAAACTGCCGAATGTG  
GGAGCGTGGACGCGGACTTCTTGGGCTTTTCAAAGCAAGCGGTATGACCCAGGCCATT  
CCTTTTCTGGAAATGTCCTTATCAGACTCTATGGTAAGTACTAATTTCTTATTTAGATGGGA  
TGTTTCTAAACCTAGAGGCAGTGAGGGCTCAGGTTGTATTTTTACAGGGGTTGT**CATG**  
**TG**CAATAAGTTTCTATTTGTTTACCATGTACCTTTTGT

**Alas1:**

TAGAGAACCATACAAATATAATATAACATAAAATAAATTCAGGTGACTGTAACCCAGAAC  
ACATCCCTTTATACTGCCAATCATCCCAACAATGGGCCAAACGTAAATCTAGTGGTTCA  
GATGAAGAATAGGCCAAATGATCAAGAAATATATGAAAAGATATCCAATCTTATTAATAAT  
TGAGGAAAAACAAGTGAAAACAGAGACTCCCATGTTTAGTACCTATAGACTCACACACAG  
ACACCCCACTGGTGGGAAAACATAACCATACATAGGACAAATTAGCAATATCAAATTTG  
AAATCTCTTTATACTTTTGTATAATTGATTTATTTTATATGTGCATATGCAGGAAGGGGA  
ACCATAGAACACCTGTAGATATCGGAGGAAACTGGGGTGGTCTCTCCTTCCAATATTA  
CATGGTTTCCAGGAACCTGAACCTCAGACTGCCAGGCTTACTCAACAGCACACCTTTGGCTGA  
TGAGCCATATATAGGCCCCAGGAATTTTCTTTTTGTGCAAATAGTTTACACAATTATCCAA  
AGTTATTTGTTACAAAGTTATTTCTTTTTTAAAGTTATATATTTTCTTTATATACATTT  
CAACTGCTATCCCGAAAGTTCCCTATACCCTCCCTCCACCCTGTTCCCTTACCAGCCAC  
TCCCTCTTCTGGCCCTGGCATTCCCTGTACTGGGGCATATAAAGTTTGCAACACCAAG  
GGGCTCTCTTTCCAATGATGGCCGACTAGGCCATCTTCTGATACAAATGCAGCTAGAGA  
TCCGAGCTCTGGGGGTACAGTTAGTTTATATTTGTGTTCCACCTATAGATTTGCAGACC  
CCTTCACTCTGGTGGTACATTTTCTCTAGCTCCTCCTACTTTGTGGCCATGTGTCCTCATTA  
TAGATGACTGTGAGCATCCACTTCTGTATTTGCCAGGCACTGGCATAGCCTCATACGAGA  
CAGCTACTCCATTGTGTAATTTACCACATTTTCTGTATCCATTCTTCTGTTGAGGGACA  
TCTGGGTTCTTTCCAGCTTCTGGCTATTATAAATAAGGCTGCTATGAACATAGTGGAG**CA**  
**TGTG**TTCTTATTACCAGTTGGAGCTTCTTCTGGGTATATGCCCAGGAGAGGTATTGCTGG  
ATCTTCCAGGAATATATGTCCAATTTTCTGAAGAACCTCCAGACTGACTTCCAGAGTGG  
TTGTACAAGCTTGCAATCCCACAGCAGTGGAGGAGTGT**CTCCTGCTCC**ACATCTCTG  
CCGCATCTGCCGATCTGATTTTTTATCTTAGCCATTTCTGACTGGTGTGAGGTGGAA  
TCTCAGGGTGTTTTGAATTTGCATTTCCCTGATGATTAAGGATGTTGAACATTTTTTTCAG  
GTGCTTCTCAGCCATTCACTATTTCTCAGTTGAGAATTTCTTGTTTAGCTCTGAACCCTA  
TTTTTTAATGGGGTTATTTGAATTTCTGGAGTCCAGCTTCTTGAGTTCTTTATATATATT  
GGATATT**AGCCCCCTA**TCTGATTTAGGATTTGGTGAATACTTTTCCCAACCTGTTGGTGG  
CCTTTCTGTCTTATTTGACAGTGTCTTTTGGCTTACAGAAGCTTTTGAATTTTATGAGTTC  
CCATTTTCAATTTCTGATCTTACAGCCATCCACTTACTGCTTCTGTTTAGGAATTTTTTC  
CCCTGTGCCATATCTTCGAGGCTTTTCCCACCTTCTCCTCTAATTAATTTCAAGTGTCTC  
TGGTCTTATGTGGAGTCAAAAGTTATTTCTAAAGGAGAGGGGTAATCCCTGGGACTGT  
CCTACATTTCCACCCACGAGGGTGTGTTTAAATTAATAACCTTTGGATTTAATACTGTAA  
CTCCACTAAATAGTGGGCTTTTATGGAAAGACCTCCATTAGTTATTGGCATATGGCCATA

GTTCACATTGCCCTAGCCTTAGACCTTAGAAAAGGCATGCGGGAATACAACATATAAGAGAAAATAATTA  
AGGGGTAGAAAACAGAGAACTAATATTTTAGCTGTATGTTCTAAGATGTACAGGAGAGT  
GTGGGTTCTGGGAGCATACTGTCAACTTTGTAGCCGAGGTATGTACTTTGTAGATGTGCA  
ATTATTAGTAGCCACCCTCCAGTCTTAGGGTCTTTATCTGTGACAGAGATAACTGTGC  
CTCTGTCTTAAGATTTCTTTTTTATGTGAATAATCACTTTATTATCTGACTGTTGAAAT  
AAAATTTCTTTAGTTTTGAAAAATAAATATAGATATACACCTGAGAATAAGACCTGAACAT  
CTGTTTCTAGAAATCCAATCCAATTACAAATCACACAAACCAGCCAGTGTGTGGGTTTC  
TTCTTACATGACCACAATGACATCAGCAGCCTTCTTTCAAATGATTTTCATTCCCAGACC  
ACTGTGGACATTAAGAGCAAGTGTCTTAAGATTCTTATGAGGCTTAATTAATCAATGCAA  
AGTAATTACCCCTCAAGGTACAGAGTAAAACCACTGAATCAACACAACTGTTATTTTC  
TCAAATAAGCACTGTGCCAAATATTTGTTCAATTTATTGAAGTGACACAACATCCTTTGA  
GTTGATCTACTTTCCATGGAGGCTCACAGCTAGAACCCTTCAGAGCCCCAGTGCCTAGAG  
TGCCGAGAGTGTATTCTATGTCTGACTTCAGGGTCTCTC **CACGTC** GACTTGCCTTTAGT  
GGCTCCTTCACTGGCTGAGGAACTGAAGGTGAGGGATGGTTCTACAGAAGGTGCCCT  
GCATTTATAAGGATGGTCTGATCTCAAATCGAATGAGTTAGTTTACTACCCAGAGGG  
AGTAGAGGAAGAAAACAGAAAGAGAAGGCACAGAACAAGGGGAGTGAAAGGAGACTACTT  
TGCTTTTTATCTTTAGCAGAGGCTGAGATACCTTAAGGCCGAGGCGGAAG **GGGGTGGG**  
TGGGGTGGGCGGGCTGAGCAGGAGGCTGGGATGAAAGCTGCTTCCAGCCAGCCACA  
**GCCTCACCGTCTTTGGTTCGTCTCAGTGCAGGGCAACAGGTAAGAGGTTCTTTCAGTG**  
TTCTTTCTGGGCTCTACCAACACTGTATGTTGACCCCTGGGTGGACTTTTGACCTTCACA  
GAAACTCTCTCTGTTTGGGGGTTTCTTTCTTCTCCTCTCCCTCTCTCTCTCTCTTA  
CTACTTTCCAGTACTTTTCATCTTACTTAATCTCTCTCTCTCTCTGACTTCTGTTCTCT  
TTACTTTTCCCTCAAAGGACTTTTCTATCTCCTCAACCCTCAAACCCTTCTCTCTCT  
TCCTTAGTCTCCTTCTGTCTCTGTCTCTTCTCTCCCCATTTCTCTAGGAAAGGCATCT  
TCATAATTTCTTCAAATTTCTCCAGTACCCCATTTACTTGACACTTTCCATCTGCT  
TGGCCTAGAACAGAGTGTGAGGTTTCAGAGCCTTGTGGGTAGGGGGTCAATCCAGGGAA  
GGAAAATTGGAGGCTTTTGTGGGGGAGGGGGGTGGTTAAGAATGGTAAGGCAAGATGCA  
GGAATTGAGAGGTTGCAAAATAGTAGAAAATAAGGGAAAAGGCGGAAGAGAATTGTCAT  
TGTACAGAAAAGGCAGATTTGGAGCTCTCACTCTTAAGTCACTGTGAGATCCAGGCAGT  
CATTATCCTTTGACAAAAGGGCTCCCAAGTTCCTCCCAAATTTCTAGTTTGTGGT  
ATACATCTCTGTTTTTAATTGTCTTTGACTTTCCAGGGTTGGAAAAGAGGGCACTAGG  
AGGGGAGATAAGGCCTGATGCTTCACTGGAAGAAGCAAGGGATTCTTTCCAGACTTAA  
TGATTCTTAATATCAAGCCACAAGTAATGGGAGACAGGGGACAGAAGAGCTGCAAGAGTG  
GCTTCTGGCTTCCCTGCTGGGATGGTGGCCAGCTGATCTTTCTGGCCTATGGGACTGCA  
AATTAGGTGCTGACCTAAAAGGGAATTATAGACATACAGG

**Aldh1a1:**

CATTTCAATCCCAAAGACCCCACTTCTCACATCATCACATTGAGTGTGATGACTTCAGCAC  
ACACACTTTGAGAGGAAGCAAATATTTGGTTCATTGCATAAGAGCTCAGAGCTTAGTTCA  
CTATTTACACCATTCAATTTATATTTTGTACTTAATCTCTAATTTCTATTTATACTAATA  
GAACATTC AAGTACCCATTTTCTAGTGTATATATATTAGTGGAAAGTTC AAGCTAACCAT  
GTAAGAAAGCCTTTGAACTCATAAGAAACAGCTTTTTTCAATGGAGCTGTATACAATGTG  
TTGGCTTCTGAGCTGGTTTTAGTGTATAGAGAAGTGTGGTTCATGCATTTTTTTTTGGTA  
TAAGTAAAGCATGGCAAGAGTTGGAAGCCATGTCTTAATTAATAATCTCGTGTGTGTGTG  
TGTGTGTGTGTGTGTGTGTGTGTGTGATGTGCAATTTAGATTTTAATCTGAGAAGAAA  
ATGATTACTCAAACCTTTTGTCTAGGATCCCAAATGAAAACGTGTAGCTTTGGGTCTAGTCT  
TGAGGAGTGGTACCTGGTTCCCATCTTTTACCTAGTGATTCTCACTCTTTCTAATGCT  
ATGACCTTTAATACAGTTCCTCATGTTGTAGTGACCCCAAACACAAATTTATTTTGTCT  
ACTTCATAACTGTAATTTTGTCTATTGCTATGAATCATAATGTAAATATTTGATATGCAGA  
ATATCTGATATGCCATCCACAAGGGTTGTGACCCAGAGGTTGAGAATTGATAATTTATA  
CTGAAGCCTTACTTTCCCTCTTTAAGGGGGGAAGAATGGGAAAAAAAAGTCTTTGATTTTT  
TGTACTCATCCCTAGAAAATAAATTTCTATAAAGTAAAGTCTGGGCTGGTAAATAGTTA  
CCTCGAAAATACCAGTCAATAGCTTGGCAGTTATAAACAGAAAATACCAGCTGGTCAA **CT**  
**AGCCAAAC**CTCAGGAATGACTGGCGCCAACATACGTCTTTGTAAATATTTGCTGAAGAG  
TAATAGACAGGTGTGGTAATTTGTCTCTAAACTCGTCTTTAGCTCCATGCATCTATTTGAA  
TCCACAAATAACAACACTCTGCAAAATGCAGCTATTTGGGTATTGGCCAGAGCATTACTTT  
GCATGGTATGTAACAGCTGTTGAGCAAGTGTGCATTTAACTCAAGTTTGACTCAAAGGC  
ATTTGTAAAAGAAAAAGAAGTTTCCAAAATGACAAGGAGAGATAGAGATAGATGATAGA  
TGGATAGATAGATAGGATGATAGATTGACGGATGATAAGATTATGTAGGAAGAAGCTAA  
ATTTCTAGCCAAATAATCAGTGGTGCAGGGTACTTAAGGACATCTCAAAGGTAAGTCTTTG  
AGAATCTAAAGAACAGTCTGTACTCCAGATCCAATCTGCCTCCTACTTTTGCCAAACAT  
AATATTTTAAAACATAACCACCCATTCAATCTTCTCTTGACTATTGTTCCATTTAAACA  
GCATAGACGAAGTGACAACAGGATTGATATGTCCAGGAAGATGAAAACATTTCTATCT  
GTTTCATGAGAAAAGTCTGCCATTACTTTCTAAGATGAACAAAAGGTTAACCATAAATTT



AACACGCTTTTGTGTCATTATTAGCTGAAGTCAGAGCAATAAAGCTCTGTTCCTTGGTCTGA  
GCCACCAGGACTTTGGGCATAATGTGGTTCATAGGAACTCTCCAAGACAAAGCTATCCATG  
ATCACCTAACCCAGGAGTTAAAGCAAACCTTCTGGGTGTTTCAGCTACATCCTCATCATGAC  
CATTTAATCAGGAATTAAGTTCGAAATGCTAGATTGTTTTTTATTTATTTATTTTTTAAA  
TTTTATAGTATTGACCTCTTCGGTCTGAACGTAAACCTTACCCTGCAGCTTAGGTGTTTGA  
TCTTCTAGCTTGGGCTCTCCAGTGCCTGTCTCACAGCTCCCTCCCTCACCCCTCCAGCC  
TGCCTCCTCAGCTGGAAATGATTGAGGCCCTCTGCAAAGGTAGAGGAGGGCCCCAAAGA  
AGACTGGAACTGGGCAGGCTGCTCTGAGGGAGGGAAGGAGGGTGGGAGGGAGGGAGGGA  
GGGAGGGAGCATAGCATGGGTTCAAGTCAGTGGACTGCCCTGGGGGTGTTTAGAGACTACT  
GCCTCCAATTCCGTCTTTTTCAGACAAACCAGCTTTGGAAATCAGGGCTTGCTTATTGATC  
AGGTCAAGAAGCTATTATAAGATGTAGTCTGTTGCCCTGTGAGGATGTTAATTCATCAGAT  
TTAAACTAGATACCTTAGTGGGCACTAGTTACTCCTCTCTCTTTAACTGGGATGGGATT  
GACTGGTCAGAGGGCTAGAATTCAGTCCCTCTGCTTTCTCTATCTTTCTGATTCTTGAAT  
CCTAAACTCTGTTTACCAGATAGGGAGACCCTTCAGTGAACAAGAGGGAGTTCCCATCT  
TGTCCCATAAACACCTTAAACACCTTCCCCCTCCCTCCCTCCCTCCCTCCCTCCCTCC  
TCCCCCCCCCTTTTTTCTCTCAAGACAGGGTTTTCTCTATATAGCCCCAAGTGTCTGGAA  
CTCATGTAGACCAGGCTGGGCCCTTGAACCTCACAGAGATCAACCTGTCTCTGCACACACA  
CACACACACACACACACACACACACACACTCACCCCCCACCCTACCCTCAGCGCTGGGATT  
AAAGGCAGCACTAACCCCAATGCCATAAACTTACATTTCTCGAGCCTTTAAACTGCCCTT  
CCATAAGTTAATTTAGTTATTTCTGGAGCCCTTCAGAAAGACTCCAGCAGTCCCATGAAC  
TCCCCGAGGCACTACTAGAGCCAGCCTAGTCTCTTTCCCTTACACTCTCCAGTTTGGAAAG  
AAAACCTTCAGGAGAGAATGTTTACAGTGAAGGTGTCTATACCTGATTGAACATTTCTAA  
ATTACACCCAAACTGCCACTTCCGAATAGGAGAAAACAAATCATCAGAAGGCTGAAGTT  
GTGTAACAGGTAATCTCTTCTGGACCAAGGCCATCTCTGGTTTGGCAACCCAAACCAAC  
GTAGCATCTCTTTTCTCATCTCTGAAAAAAAAAAAAAAAAAAAGAAAGCAACAGAG  
AAAAGTAGCCAGAGAACAGAGATAAAGGTAATGATTAATCTGTCAAGTACAAAAAGAG  
TCATTTTGAGGATTTGGAATTATAACTCATTAATGCAAACAAATAGCAATGAGCTGGGAG  
GGAGGGAGGGGCTGCAGCAGAGGCAGACAAGGATTAAGTCACAGTTCCTAATTAGGACA  
GGCTCTCTGACACAGTCAGGTATCTCTTTAGTCGCCTCCAGAGATCCGTGCAGAGCTAAG  
TGAGCTTGGTTTTTTTTAAAATTCTTTTTTGTTTGGTTTTGGTTTTTCAAGTCTAGTGAAGG  
CAGGAACTGAGCGAGCAGACCTTGGTGGAAAGCTTACTCTGGCAGAAACCCCAAGATG  
CCTTCTGAGAAGGACCCGAAAGAACCTCTGTGCAGAGCTGGCCCTGAGAGACTGT  
CTGGCTAAGGAGACACTCTCTGAGTTCCCTGGGCACCTTTATAATGATTGTGAGATTGCT  
CGATTTCCATTTTCCAGTTTCCAGCCTAACCCCGCCTTCTGGCTGCCAGGCGTCTGGAG  
CAGGGCGTTTGTTTTTTTTGTTTTCCCTGATTATCAGTTCCAGTCCCTTCTAGGAGGCAGC  
AAGTCACTTTCTAGGTTACTTGAATTTGGTGACCAATTAAGAGCTTCGTTCCGCTCTTAA  
CGTGTAGCCAAGACAGTTGATAGGAGTGGAGAAGGGGGGAAGGGGAGTACTTCTTCAATTT  
AAAATGTCTCAAAGTGGCTTTTATGATGAAAGAGTTGCTAGACATGGCTTCCCATTTGGT  
GACTGATCATCTGAAACAAACATTAATGGTCAATAGATAGCTGGAACAGGCTGCCAAG  
AGAGGTGCCTGGCAGTTTTGTTTGTTTGTTTGTTTGTTTATTTATTTATTTATTTATTTG  
TGTGTGTGCACGAATGCACACAAGTGCATCTGAAAAATGGCTGGCAGTTTTATTTATTTG  
TTTGTTTGTTTGTTTATTTATTTATTTATTTATGTGTGTGCACCAATGCACACAAGTGCATCTG  
AAAATGGCCTGCTGGAGTCAGCTCTCCTTCCACCATCCTTCCACCATGTGACTCTAGGG  
ATGGAGCTCAGGTATCAGGCCCGGCAACAGGGACTTTTATCTCGTAGTGCATCTCACC  
GACCTACTTAGTAAATCAGAACTGGGGTTAGTATGGTGT

**Bin1:**

ACTCCTCAGGAGCTGTTTTCAGCTTGTTTTTGGGACAAGGTCTCTCACGGGCCCTGGGCTCGAC  
TGTCAATTAGGCTGGCTGGCTGGTGGAGCCTGCCCTTTATTTGTGTTTTGCCGATGGGAC  
TGGAGCCTCAGCATTCTTCTTGTATGATGGTTGTTCTGAGCCTTTTATCTGGGCATCT  
AATTAATTCCTACATAGATTTGAGGATAACACATGTATATATTTGGTTGTCTTTTCATTT  
ATAATTAACAGCGCAGCATCACTTTCTGTGTTTCCCAACTGTGAGAGATTTCTCCAAG  
GCTTCTCTTCTGCTGTGCCAGCAGGCCACCCCTTTCCCAAGGAGGACATTACTCTGTG  
CTTTGTATTTTTCTGTATATTTTTGAAACACCAAAGCCCAATGAGGAGCAGAACTTCTAT  
TCCCAGGGGCTGCAGGTAATAGAATTTGACTTCTGCTCATTCTTTCTTCAAGGAGTGT  
GGAAGAAAAATGCTCTGCAGGCCTGGGGATGTGGATCAGTTGGTAGGGTACATGCCAGT  
ATGCATGAAGCTCTGTATATAGCATTTGAGCATCATTGCACAAACTTGTAGCCCCAGCAT  
TTGACCCACAGCAGGAGGACCAGAAGTTCAAGGCCATCCTCAGCTACACATAAGTT  
TTAGGTCAAGGGATAAAGAGATTTGGGAGGAGGAGTAAAGGGAGGGAGGAGAGAGAA  
AGAATTTGCTGGGAGGGTAGACAACTGTGAAATTAGGAAAGAGACCCCGAGGTAAA  
CACGTATTTAGGAGAATGCTGTTTTAGAAACCCAGGCTGTCTAGATTATATTTGCTGGGC  
TCACAAATGGGATATAGGTTTATAATGATAAATTTGCATGTTCTTGTGTGTATATGTTTGT  
GCATTTAAGTGTGTGGTGTACATAACATGTTTGGCCATGGAGACCAAAGGTCAACCTTT  
GGTCACTCTGGCTCGCCAGCAAGCTCCAGGGATTTCTCCTGTTGGTGTCTTCAAGCCCTG







TCTGCTTAAACCAACTCAGTGTCTGTGGTTTCCTCCACATTCCCCAGCACACTTGGGGAAT  
CACCCTCCAGACAAAGCATAACAGCACCCCAGCGTTACAATCTGTCTCAGGAGGATGCAAG  
AATCTGTCCAGACCATAAAAAGGAAAACCAGGAGGCCTGCAGAACCTGT **CATGTG**AAGAAT  
GGGAAATACAAAAGAGAAGACCTTG **CACATG**GACATTACACTCCTGTCCAATACAAACT  
AACATCAGCATAAACCCACAGGAAATACAAAAGTTTAGAGCTTTTTGTTTGTTTTGTTTT  
TGTTTGTCTGTCTGTTTGTTTTTGAGACAGGTTTTCTGTGTAGCCCTGGCTGTCTCTGG  
AACTCACTCTGAAGACCAGGCTGGCCTCAAACCTCAGAAATCTGACTG **CTCTGCGCTC** TG  
AGTACTGGGATCAAAGGCGTGTGCCACCATGTCCAGCAAGAGTTTATAGCTTGACTGGT  
CCTCCTCTCCCATCTCCATGCATGAAAAGGAGCATCCCAAGAGAACATAAAACACCTGGATT  
AAATAAGGAGCTTGATACATGATATGAAAAAGGAAGTTGGGTTGGAGAGATGGCTCAGTG  
GTTAAGAGCACTGACTGCCCTTCAAAGTCCCTGAGTTCAAATCCCAGAAAC **CACATG**GT  
GTCTCAACCATCTGTAATGAGATCTGATGCCCTCTTCTGGAGTGTTTGAAGACAGCTA  
CAGTGTACTTGATATAATAATAATAACAAATCTAAAAAGAAAGAAAGAAAGAAAGAA  
GAAAGAAAGAAAGAAAGAAAGAAAGAAAGAAAGAAAGAAAGAAAGAAAGAAAGAAAGAA  
GAGAGAGAGAAAGAAAGAAAGAAAGAAAGAAAGAAAGAAAGAAAGAAAGAAAGAAAGAA  
AAAGAAAGAAAGAAAGAAAGAAAGAAAGAAAGAAAGAAAGAAAGAAAGAAAGAAAGAA  
TAAATAGGGTATAGAACCATTG **CGGGAGGGG** ACCATAGCAAACCTACTGGAGATCCAAAT  
ACAAATTAAGTCAAATTA AAAATTTCTGCAGAAAGCCTTACCAGTAGAATCAGTCAAGAAA  
GGACAGCATATCTGAGCTTGAAAGACAAGGCCTGGGAGCAGAAAGTGTCAAGGAAAAAGA  
TGAATTAATGAAAAGGCATGAGTTGGACTTTGGGCTATTTAATACATGAGGAGAAGATAA  
AGTCTAATAATCAGAGATAAAAAGAGACTGAACTTCTTCAAATGCACAGAAAACATTTTC  
CAGTGAATCATAGCCAAAAAAATTTCTAAATTAGGCAAAGAAACATCTAATCAAATA  
GAGAAGTCATTTAGAACACCAAAGAGACAAGACCCAAAGAACTTCTTCTGTCAATTT  
ATAATTAAGTTATAGTACTAAGTATTTAAAACAAAGAAAATGTGTAAAAAGCATCAAGA  
GAGAACCCTAAGT **CATGTG**TCAGGAGATGTCCATCAGCGTAAACAGAGAGCTTGGAGAGG  
CGTTCTCAAGCTTTGGAAGACATGAACCTCCAGCCCAGGACAGTATTGCCAGCAAAGGG  
CTCCTTCATAACTCAAGGAGAAAGGGGATCCTCCCTTGATAGAAAAGAGGCTAATGAACT  
CACGAAGACTGAACCTGGGTCTCTGAAAAAGCAACAAGTGTCTTAAACAGTGAGCTGG  
CTCTTTAGCCCTCTCTCTATTTCTATTTGACCACATCAGACTAAAAACCAAAATGAACA  
GCAAAACATTCAAAACTCAGGAGATTTGATAACTGAGTGTGTAGACCAGACTGCCCTCA  
AACACACACACACACCTGCCTCTGGCTCCCAAGTGCTGACACCAAGTGGTGAACACCACC  
CCAACCAGCCTTAGATGTTTTCTTCTGACAGACGTTCTAAAGATTTTTTTTTCTCTGATGT  
TAAAGTATATTA AAAATATCTAAAGGGGCTGGAGAGTTGGCTCAGCGGTTAAGGACACTT  
GCTGGCTTCAGTTCTCAGCATC **CACATG**ATGGCTCACAACCATCTGTAACCTAGTACCA  
GGGAATTTAACACCCTCTTCTGACCTGCACAGCATGCATGTATGTGGTAGACATACA **CA**  
**CATG**CAGGCAAAACATGGATATAAAAATAAACTTTAAAAATTAAGAA AAAATAATTAAG  
AAGGATTTGACAACAATTTTATATATCTTGCAAGACATATAAGTTTACTTTTATAATC  
TATATCTGTGCGTCTGCTCAATGAGCATAAGCCAGCGTCTCCAAGCTAACCTCTCAT  
CAGGGGCTTAGAAGGATCCCTCACTCCACCCTGTGGCCAGAGCTAAAGGAGTGAATGAA  
TTTTATAAAAAGGAGAAATCCTTCTGAAAATATTTACTCTCTCTGAATCAATTTGAACTTT  
GGAAAGCCCCAAGTACCTTTGCCCTCCACTTCCCACTGCACACTGTTCCCTCTCTTAGA  
ACTAGCATGTTGGGTGTTATGTAGTCAAAGGAGGGCATTAGAGCTGTACCCAGGGACT  
TCTGTACTCTTACATGTATAAATGAAAGCAAGACCGGGCCAGGAAACAGCAAGCAGTCTGAA  
**GGCCAGCTGGGTCTGCCACTAAGAAG**ATGAAGCCTTTTCATACTGCCCTCTCTTCCCT  
ATTCTTACAACCTGCTCTTGGAATCTGGGCCAGATCA **CACATG**GTGAGTCTGTGGTGGT  
AACTGAAAAT **TGGGGGGG**ATTCAGAAGGGGCAGCATTTAATAATTTCCATCCAGACA  
GAGCAATGGAATTTACTTAGTACAGACCTGCCTCTGGCTATAGCCCCTGGATCAGTGGTT  
CTCAACTACCGTTGCCACCCTTTTTGGAAGTCAAACAACCTCTTACAGGGCTTGCCCTA  
AGACCATCAGAAAACATAGATTTTTACATTAATGATTCATAGCAGTAAACAAAATTACGGTT  
ATAAAGTGTAGTAAATAAATACTTTATGTTGGGGATCACCAGCATGAGGAACTGTAT  
AAAAGCTGCAGCATTAGGAAGGGTCTGTCTGGAAGCTGGTACACAAATGGCTGTCTTC  
CATTGGGAAAGCAAATGTTTTCTTTTTCATAGCTAGAATTAATTTGATAACTTTTCCCTA  
GCCAATCCTAGCTGACATTTGTAGTTAGATCGAAATAACTATAATTAAGCATAACATTTGT  
AGAAATGAATATAAACTCTGTGATGCTAGAGTTATTAGATGTGAGCTAGTATAGAACCA  
TCATTTTTAAGGCATTGGGACCAGTCAAGCCAATGGCTCATCCAAGGTCACCATTTTCATC  
TGAAGCTATGATATTTTAGTTTATGGAGGTGACCAGGGCTCAACACAGAGAGGTCCTGTG  
AAATAAAAAGAAATGTATTTCTCAACTTTTCTAAGGAGGAGAGATACATCATGTCTCACAGA  
GCCAAGGAAATATTTGGAGTTAGGCCAGGAGGATAAGTAATGAAATAGAGAAACTTTGTG  
TCAGATCTTTTATGGAGATACTGGAAAAGGCAAGGGCAAAATGCAGGGTTCAGTTAAG  
ATTTCTAGACTGAAGAAGTCGAGCAGACTTTGTATATAT

**Clu:**

CCGTGACTCAGCTCCCAGCTCAAGGCCAATGTGGAGTATGCAGGATAAGGAAGTGGGTGC  
TCTACTCTGCTCTACATGGCCAGGTCACCTCCTGGCATTGACAAACGCAGAGCTGGGTTT



ACTTTTAAAAATATTAAAAACAGGACCTATGAAGGGATGGTTTATAAAAAATGCATTGGA  
AAAAAATGGAGAAAATACGCCACAATGGGAGAGGCTATGT

Daf1:

AGGTGCCTCCCTGGCCAGCCAGCCTGCCCCAGTCACTGAGCCCCAGGTTCTTCCAGTGAG  
AGACTTTGTTCAAAGGCATGAGCAGGTTCTCTGAGGATGACACCTGAGACTGTCCTGT  
GTCTTACACACACACACACACACACACACACACAGAGGTAACAAATTGAGAACATA  
CACACAAAAGTCTTAGAATCAAGCTAGATTTGCATTTTAACTTGGCCACTCTTATTTT  
TGCAGAAATAACTATCGTGTCTGTCTCTCATCTGTGAAATGTTGATAGCTCTTCCACC  
TCATGAAGAAATGGAAGTGGAAAATGGTACATGCATAAAGCAAGTGGAAATATAGAAAATC  
TGGGCCAGTGTCTTAGTCAGGGTTTTCTATTCCTGCACAAACATCATGACCAAGAAACAAG  
TTGGGGAGGAAAGGTTTTATTAGCTTACACTTCCAAACTGCTGTTTATCACCAGGAAG  
TCAGGACTGGAACCTAAGCAGGACCTCCCCTCTTGATCACTAATTGAGAAAAATGCCTTAC  
AGCTGGATCTCTTGAGGTGGATGCTATTTCCCCAAGTAACTACTTTCTCAGTGATAAC  
TCCAGGTGTGTCAAGTTGACACAAAACCTGCCAGCACAGCCAGCAGCTGAAAATAAAAATC  
CCTAAGTTATCAGCTTGAAGTTTTGTTTTTTTTTTTTTTTTCTTAGTAATGTTTATATTTAATC  
CACACCTTTTTAAAAATTAAGTAAATGCATCATGTGGTGTGTTAAATCTTTCCCTCCTG  
GGTATTGTAAATATTTGGGTGGTGGCAAGCATTACGTAAGTGTCCACCATTAAATCTTA  
AACTCATTCTTTGGAAAAAATTTACTGAAAATAAAAATACTTTAGAAAAGTGACAGCT  
TAGACCAATTGGTGTTCAAAATTTGGGCGATAAGATAGGTTTTTGTGTTGTTGTTGTTGTT  
TGTTTTTTGTGTTGTTGTTGTTTACAGACAGGGTTTTCTCTATGTAGCCTTGGATGTC  
CTCGAAGTCACTGTGAGACAGCCTGGCCTGGAACCTCAGAAATCCGCTGCTCTGCTGCT  
CAAGGGTAGGATTAAGGGCTGTGCAACCCTGCTGGACAATAAGATAGTTTTGGA  
CACTTGGCTGGGCTCACTGTTCTATCTAGCTATAAAGCTATGATCTTTATTTAACACACA  
TAGAGAAGTCTTTCAAGGGTTTTATGAGTGTCTCCCTATCTGATTTTACTCAGCTAACT  
ACAGCAGGGCAGAAAAAAGTAGTGAATGAGGTACAGAGAGCTCTCAGGGAATAAATGAA  
GGTCCATGTGACACCACTTCTGTCACTGCTGGGCCCTGACATGCAAGTGGCACATAAGGA  
AGGAAGGGTCAAGTTTTTAAACAACCTATGAGAAGAAACACACTTGATAGTTATGAAACCT  
CTACCTTTGTGAGACTTAACTTCCAGGATGTTTTTAAAGAAATGGCCCTATGAGGCCAAG  
TTAACTTTGAACTTCAAACCCAGGCTAGCTTTTAAACCCAAAACCTCTGTCTACCTTC  
CAAGTTTACAGGCATGAGTCGCTAGGGTATGATGTCAACTCCAGAACCCTTAAATACTGT  
TAGATTTCAACAACACCTATAAAGCAACCCTTCTCTGTAATCTCGGCAACAGGAAAACA  
CGGTGCTTGGGTAAGTAAGCAAGAATCAGAAGAAAACACTTGTAAAAAACAGTTT  
GCTCTTCAAAGCTCACACTAACCAATAAGGAACCACAAGAAAACCTTTAGGAATGGTTAT  
CAGTATATGACAAACACTCCCAACTGGTCTACCATTGAAGGCTGAGTTTCTGGTGAGG  
GATTTACCCAGTTGGGTAAAAACCTATATAAAAAGGGAATTCATAGTGGGACACTGCTA  
ACAGACCCAGACACAAAAAGGGGAGCACTTTGGGGCTTTTACATGAGGGCCTGTGGCA  
ACTTACCTCTGCTTCCCTCCACCTCGACCTTCCCGGTGGGGATTTGAGGAGACACATGG  
TGTGGTACATGGCTCTTTACTCTGGATATCACACGCTGGGGCTTATAAAACCGGGTT  
GCACAGTGACCAGCCAATACCAAATAATCCTAATTCCTAGTGCTGTCTCAAGAGAGGTT  
CAGTTTATTCATGCACAGCTTACCTTCTGCATTCTTTTCTTTCTTTTCTTTTCTTTTCAAT  
TAATTAATTTAATGCTCTGGTGTGATTCCAATGTGTGGATCGCTTTGTTTGTCACTGTT  
TTCACACCACGAAATAAATCTTTTTCTTAAGCTCTACTATTTATTTCTGAAATTCATTTT  
ATAGCAGGACTGAATAATCCCAAAGTCAATTCAGTGGTATCTTTGGTCCATAT  
AACCGGGCTAAGAAGGTGACTCTCACCAGATAGGGTGTGAAAACCTCAGCCAAGCT  
CCCTAGATCTCTGCATATTGTTTGTGACCGGTTCTGGCAGGCTGATCCCCCTCCCTGTTTT  
TTGGATCCATCTATTTTCTGTTTTGACACCATGGTGAGACCTAGGAGACACACTCTTG  
GTCAGCAGCTCCACCCCTCCCATCTGACATCTTCCAGCTGAAGCCACAGGGGCTCCTGGGT  
GTTTCCCTATTTCTCAGCTCCCTCTGGCTCAGGAATCCACCAGCCTACCTTCCCTTT  
GCAAGCACTCAGCACACAGAGTTGGGAGTGTGGGTAGCTTTCTGCTGGAGCAGAGTGTCT  
GACACAGATCACTGGGGGAGTGAAGCGCCCTCCTTTAGAAGGTAATCTCCCCAGACCCAG  
ACCCCACTCCCGCCGGACAACCTAGGTCCTGGTGAAGCTAGAGCCAGGCCAGCCAGCCG  
TCATTAATGAGGGAACGCCCTCTTGACAGCAGGCTGCCCCACCAGGGTACAGAGGGCC  
TGCCCCGCCCCGCCACAGCTGCTCAATTAATCTGCGGCTCAAAAACAGCTCCAGCCGAGCC  
GGCAAGGTTCTTTCTACTGGGCTATGATCCGTGGGCGGGCGCTAGGACTCGGCCAT  
CACCGCCGCTCCGCTGCTGCCGTTGCTGTCTGCTGTCTGTTGCTGCTGTCCCAACTG  
TACGCGGTGAGTGGCCAATGCGCGACGACCGGCTGGCTGCCCGCCAGGGGGCGCATGCTC  
AGCAGACATTTGTCTCCAGTAACTGGGGGCTCCGCTGCTGGGTGCGCGGCCAGCGGGA  
GGGATGGGGTGGAAATCTGGGCTGTGGCTGTGACTGGATCCCTCCGCGATCAGAG  
ACCGTGCGCAACCAAAAAGGGAGGTTGAGTGCGAATCTCAACCCTGCTCTGTGCTCTT  
TTATTCTTAAGGTGGAAGCTAGATGGCTGGCCACCTGCGCCGGTGAGAGACTGGTCGCGA  
GCAGCTACCGGGTGTCTTATCTCGGCCTTGTCTGCTGCAGTGTCTCTGTGGATATTAAG  
TAGATTTCTGAACGACTCAAGGCGGGTGGGAATTTACTCCCTACTTAGTTTTTGTCTTGTG  
TTCAGGAGTCCAAGCATTCCAAGTTCTGAGGGGCAAGTTCAGCCCTGGCAGGAAGGT

AAGAGCCATTGCTGCTTCTCTTGTTCAGGTCCTGGGAAAAGAAAGACTCCTTGCCAACTTC  
AGTTTTACACCTGCTCTTTTCTTCTAGGAGACTGCGGCCACCTCCAGACATTCCTAAT  
GCCAGGCAAATCTTGGGCAGACACTCCAAGTTTGTCTGAGCAAAGCAAAGTGGCATACTCG  
TGTAATAACGGCTTTAAACAAGTTCCAGACAAGTCAAACATAGTTGTCTGTCTTGAAAAT  
GGCCAAATGGTCGAGCCACGAAACATTCTGTGAGAGTAAGTTCTTCATTTCTCTTCTGAA  
AAGTTTTGGGAATGTGGATCTCGTTGAGGTTATTTTTATGCCTCTTTGGAGTGA CTGGTA  
ATTGATAGTTTTCTAGCATTATTAACCCAGGGTATACA

**Daf2-Truncated (3444bp):**

GTCTCCTTCCCCTGGTACTCCAAACCCCTACATCTAATCCCTCCAGTAAATGGCTATAG  
CCAAATTTCAATTTAACCAATAGTTTTAAATCAAGGGAAAAGATTTGCACAACCTAAAGCTTA  
TAAACATGAGCTGTCACTTGAAGGCCTAGACCTTCAATATAGAATTTAGCATTACACCA  
TATAGCAACAGACCAATCTCAACACTCTGAGCAGCCTGCCACATACAGGCTCCTCAAAT  
ATCTTTTTAGTCTGTTGCTCAGTCTAGAAAAGTGCCCTGGCTCTCCTGACCATGAGCATAT  
AACCTTCTTCTTTCTTCACATGCTTGTGTACCAACAAACCAACTTGTGTAGACAGTT  
TGGTAGAAATAGTGGGTCTTAGACTCTGTATCCACTTTTTCTTTCTGAACCTCAGACCA  
TGTAGTTTGTCTGTTGATACTAATAGTTTTGTATCATATAACTAGAGATTTGGATTCTCGAAA  
GGAAATATTCCTAAATGCTTTAGTCTTTCTACCTGGGCAAGGACTGTGCTTTCTTATTCC  
TGCAAAATCATAGACTTAAATGTCTTTGTTTCCCTAACCTAATTATATAAAATGTGTCAATTT  
GGGAATTGGAGATCTATAGGGACAAAACTGTTCTGAGACATTTTCAAGTCAACGTGGA  
ACAAGATGCTGAAGAACACATAGCTAGCTTCCAGAGTACAGAATCAAAAACATGAATTA  
GTGTTACACCCAGAAGTCTTAGGTTCCAAACCTCTTTGATAATTTACTGTGCTCTAGG  
TAGGACAAATCTTTGATAATTTGTTCTTACAAAAGAATATGCTGGGGAGATAGCTTAGTTG  
GTAACATGTTTGTCTGTTCAAGCATGAGGACCTAAAGTCAACTCAGGACTCAGGTAAAAA  
TACACAGTGTCTAATGTGCACCTGTAATCCAAGCACCCAGGGAGACAGAAAAGGTGCCCTC  
CTGGCCAGCCAGCCTGCCCCAGTCACTGAGCCCCAGGTTCTTCCAGTGAGAGACTTTTATT  
CAAAGACTTGGGACATGTTTCTGAGGATGACACCTGAGACTGTCTGTGTCTTACACA  
CACACACACACACACACACACACACACACACACTCACTCACACAGGCACACACACACA  
CAGAGGCACACACACAGGTACACACACACAGGCACACACACACAGGTACACACACACAGG  
CACACACACACACAGGTACACACACACACAGGCACAAATTCAGAAGTACACACACAAAAG  
TCTTAGAATCAAGCTAGATTTGCATTTTAATCTGGGCACGTCTTAATTTTTGTTGAAAGA  
ACTATCGGTCCTCTCATCTGTGAAAATGTTGATAGCTTTTCCACTTTATGAAGAAATGGAA  
CTGGAAAATGGTACATGTATAAAGCAAGTGGAAATATAGAAAATCTGGGCCAGCATGTAAA  
AAAAAATACCCTAAGTTATCAGTTTGAAGGTTCTGGTTTTATCGTCTTAGTAATGCTCATA  
TTTTATTGCAATGCCTTTTTAAAAAGTAAATGCATCATGTGATATTTTTTATTCTTT  
CTCTCCTGGGTATTTGTAATATTTGGGTGGTGGCAAGCATTACTTAAGGGTCCACCAT  
AATCTTAACTCATTTCTTTGGAAAAAACCTATTACTGAAAATAAGTACTTTAGAAA  
TTGAAAGCTGAGACTGATTTGGTTCCTTAACCTCGGTGATAAGATAGTTTTTTTTGTTG  
TTGTTTGTCTTTGATTTTTGTTTTTTCGAGACAGGGTTTTCTCTGTATAGCCCTGGCTGT  
CCTGGCACTCACTCTGTAGACCAGGCTGTCTGGAACCTCAGAAAATCCACCTGCTCTG  
GTGCTGCTGGGATTAAGGCGTGTGCCACCCTGCCCTGGCCAATAAGATAGTTTGGGAGC  
TCACTGTTCTATCTAGCTATAAAGCTATGATCTTTATTTAACGCACATGTAGGGTTTTATG  
AGAGCTCCCTATCCGGGTTTTGACTCAGCTAATACAGCAGGGCAGAAAAAAGTAGTGA  
ATGAGTCCACAGAGACTCTCAGGGAATAAATGAAGTCCAGGTGACACCCTCTGTGCA  
CTTCTGGCCCTGACATTTCTAGTGGCACATAAGGAAGGAAGGGTCAAGTTTTTAACTA  
ATGAGAAGAAACACACTTGATAGTTATAAAACACTCTACCTTTGTGAGACTCCTTTAGAA  
GGTACACTCCAGACCCCACTTCCAATGGACTAAAGTACAGCAGGCCCCACTGGACA  
AGGTCCCCTGGGTGAAACTGGAGGCCAGGCTCCC GCCCTCATTAAACGAGGGAAACGCCCC  
CTTTGACGCGGGCTGCCTCACCTAGGTTGAAGAGAGCCCTGCCCGCCCGGCTCAGCT  
GCTCAATTAACCTAGCCTCAAAAACAGCTCCGGCCAAATCCTGGCATGGTCTCTTCCACCT  
GGGGCTATGATCCCCGCGCAGGCGCCGGGGACTTGGTCATCACCCACTGCTGCTGTG  
TTGCTACTATCGTGGTGTCTTGTGTCCAAACTGTGTGCGGCATGCTCAACAGACATTTG  
TCCAGACTAATGGGGCTCTGCTGCTGGGTGCGAGCGCCAGTGGGAAGGATGGGGATA  
GAATGCTGGGCTATGTGGGCTGTGACTGGATTCCCCTCCGTGATCAGAGACCATGGCAAC  
ACAAAAGGGAGGGTTGAGTGCGAATCTCCAACCCCTGCTCCTGGCTCTTTATTCTTAA  
GTAGATGGCTGGCCACCTGCTCAAGTGAGAGACCAGTCCGGGAGCAGTGACCAGGTGTCTT  
ATCTCGCGCCTTGCTCGCTGCAGTGTAAATATTAAGTAGATTCTGAATGACTCAAGGCGG  
GTGGGAATTTACTCCCCTAGTTTTTTGTCTTGTGTTTACGAGAGTCCAAGCATTGCAA  
GTTCTCTGAGGGCAAGTTCAAGCTGGCAGGAAGTAAAGCCATTTGCTCTCTCTTGT  
TCCAGACTGCGGGAAGAAAGCTCCTTGGCCAACTCAGTTTTTACACCTGCTCTTTCTTC  
CTAGGAGACTGCGGCCACCTCCAGACATTCCTAATGCCAGGCCAATCTTGGGCAGACAC  
TCCAAGTTTGTCTGAGCAAAGCAAAGTGGCATACTCGTGTAAATAACGGCTTTAAACAAGTT  
CCAGACAAGTCAAACATAGTTGTCTGTCTTGA AAAATGGCCAATGGTCGAGCCACGAAACA  
TTCTGTGAGAGTAAGTTCTTCATTTCTCTTTCTGAAAAGTTTTGGGAATGTGGATCTCGT

TGAGGTTATTTTTATGCTCTTTGGAGTGACTGGTAATTGATAGTTTTCTAGCATTATTA  
AACCCAGGGTATACATGTTGGCAGTTTACACTCGAGCTAATTGAAGGTGGTACTTCTTA  
TGGCAAGTCCTGCTTCTTCATTAA

**Ddx3y:**

GACCTCGAGCTGTATTAAAGAGCAATAGTGCACCAAACTGTATGTATTGGTGAAAAACA  
GGCAGGTTGATCAATGGAATAGAATTTGAAGATTCAGAAATGAACCCCAAAGAGCTAAAA  
CCTCCAGTGGAAAATGGACACATTTTCAACAAATGGTGCTGGTTCAACCAGTGGTCAGC  
ATGTAGAAGAATGCACATTGATCCATTCTTATGTCTTGTACAAAGCTCAAGTACAAGTG  
GATCAAGAACTCCACATAAAAACCAGATACACTGAACTAATAGAAGAGAAAAGTGGGGAA  
GATAACATATGGGCACAGGGGAAAAGTTCTTGAACAGAACACCAATAGCTTGTGACCAA  
ATGGGACCTCATAAAATTGCAAAAGCTTCTGTAAGGCAAAAAGATATTGTACTAGGATAAAA  
CAGCAACCAACAGATTGGGAAAAGATCTTTACCAAACATCGAATAGAGGGCTAATATCCA  
ATAAAATAAAAAGACTCAAAAAGTTAGACTCCAGAGAACCAAAATAACTCTATTTTTTAA  
AAATGGAGTTGAGAGCTAACTTAATATGCACAACACTGAGGGATGTTAAATGGCTGAGAAG  
GACCTAAAGAAATGTTTCGACATACTTAGTCATCAGGGAAATGCAAAATCAAAACAACCTG  
AGATTCCACCTCACACCAGTCAGACTGGCTAAGTTCAAAAACCTCAGGTGACAGCAGATGC  
TGGCAAGGTTGTGGAGAAAAGAGGAACACTCCTCCATTGTTGGTGATAGTACAAGCTGGTA  
CAACCCTCTGAATATGAGTTTGGAGGTTCTTCAGAAAACCTGGAGTTAGTACTATTTGAA  
GATCCAGCAATACACTCCTAGGCACATACCCAGAAGATGCTCCAACATGTAATAAGGGCA  
CATGCTCCACTATGTTTCATAGCAGCCTTATTTATAATACCCAGAAGCTGAAAAGAACCCA  
GATGTCCCTCAAAGAGGAATGGATAAGAAAATTTGGGCACTTTACAAATGGAGTACT  
ACTCAGGAGTTAAAAACAATGACCTCATGAAATTTCTTAGGCAATGGATGGAACATAGAAA  
ATATCATCTCTGAGTAAGGTAACCTGTACAAAAGAACCAAAATGATATGTACTCACTGA  
TAAGTGATGTTAACCCAAAAGTTTCAAGATACCCAAGATGCAATTCACAGACACATGAA  
ACTCATAAAGATGAAAGACAAAAGTGTGGATACTTCGATCCTTTTTAGAAAGTGGGAACAA  
AATACAGGAGCAAATACAGAGACAACGTGTGGAGCAGAGACTGAAGAAAAGGCCATTTAG  
TGACTGCCCCACCTGGAGATCCATCCAATGTACAGTCCCAAACCCAGACACTATTTGTGG  
GTGCCAAACAGAGCTTGTCTGACAGAATCCTGATATAGCTGTCTCCTGAGAGGCTCTGCCA  
GTGCCGTGACAAATCAAAAAGTGGATTCTCTCAGCCTACCATTGGACTGAACACAGCGTCC  
CCAATGAAGGAGCTAGAAAAGTACCCAAGGACCCAAAGGGATTTGAAGCCCAACATTA  
TGAAACCAACCAGACGACCAGACCCTAGAAAATCCCAGGGATTAACCACCCACCAAGAGC  
AGACATGGTGGAACTCATGGCTCCAGCAAGATATGTAGCAGAGGATGGCCTAGTCAGTCA  
TAAATGTGAGGAAAGGACCTTGGTCTGTGAAGTTCTATGCCCCAGTATAGGGAAATGC  
CAGGGACAGGAATGGGGTCTGGGTTGGGGGGGGGGGTGAGAAGGGGTTTTCAGA  
GGGAAAACAGGAAAGGGGATAACATTTGAAAAGTAAATAATGAAAATATCTAATAAAG  
GAAAAGGAAAATGAAAGAGATGTTTAATAAAAATAAAAATAAACTCAAAACAAAATCTT  
AGAAGTGGTAAATAGCCAGGCATAATGGCAATGCCTTTTAATCCAGCAGCTGAGAAATCAGA  
GTCAGGGAGATCTCTATGGATCTGAGACCAGCCTGGTCTATGACAGCCAGGGCAGTACAT  
TGAGACCCATCTTGGGGGGGGGGGGGGGAGTTCTGGATGCAGCAATTTGAATATTGAC  
AGCAAGAACTCTTTAGGGGATGATACAAAATTTGCATTAATCTCCAGTTTGTAGAAA  
GGAGAAAGTACTTGTAAATAGTGTGTATAGCTGTTGATTTCTTTATAGTAAAGTCATAT  
GAAAATTAATTTCTCTCTCTACCTGAAAATGTACAAAAGTAAAAGGGGTTGAGGCATTA  
AATATGATATTTTTCTATTTTTTCGACACTGAACTCCCTACTACTCTGTAAACTAAACG  
ACAATTTCTGTTACATGTGCTTCAAACATTTATAAATCTTGTGTAACCAAGAAAATATT  
CACAAATTCACAACCCCAAGGTATGTAAAAACACAGTTTCAAGCCAGTCTTAGGGACTAGAA  
AGTAACCTAAATGAGTGGGCTGAAACCTATAACCATCATCTGTATAAATTTTTATTGTTTT  
TCAGCCAAAAGAAATCTCCTTGTTTTCACTAATAGAAGTGGAAACCTAGAAATAGTTTCAG  
CAGAGACTACCATTTATACCTTTTATTTTTTGTGAAGCTTCCAAAATTAGTAAGGTTAT  
ATTAGTAAAGGCTAATTTTAGTAAAATTTCTATTTCTCGCACCTGAAAAGGAAAATAGAAAG  
GAGCTATTAGAAAAGGAAAGCTGGTGGGAAGCCGGATAAATTAACACTGACTGGTATGCT  
TAAGATCTTCAACTGAGAAAGTCCAAGTTTAGATAAATCTTTGGACAGCAGCAGCGGT  
GGGTTAAATCCCGTTACTTAAACTCTAGTTAAAGAAGAAGAAAATACCACCGCGAGTTAA  
ATAGTGGCTCCACGTTGTACGAATTGACGAGAGAGTCGTGCGTCTTGCCTGATGACGCAA  
ACTCGTCAGTACGTTTGGGCGTATCCAAAACCTGTGTACGTAAGCTCTTGCCTTACCCTG  
AGGAAACAGGCTTACGGTGGCTGTTCCGTGAGAAGTTCTCAATTTTTTTTCAGCAATGAGT  
CAAGTGGCAGCGGAAAGTACGGCCGGCCTGGACCAGCAAGTAAGTTGAACCTATATATAA  
GACGCTCCTTCTTCCCCTTTGTTTTAACTTGGCCATGGCGCAGTATTAACATAACCGCTTA  
AACTCTTGTGTTGCTGTACTGGAGTTCTGGCCCCCATAAAAATCTGAAAAGTAATGAA  
ACTGAACAAAATGGCGTAGATGAGAAAAGAGGGGATAGCAATGACATTACAGATTCTCT  
ACAGGCTTCGCATAATGGCGGCTTTTATTTGCGAACCAGGATTTCTTCAAATATTTGTTT  
GGCGGTGCATTAAGGGAACTTGTTTTCTCTCAAATCTTGAATATTGTGTTCCCTC  
GGGTGGCCCTAATTCCTGAAGTTTGTGAGTTTTTGTAGTCCATAAAAAGCACTGACGCCA  
TCAATTTTGGTTGGCGTTTAGAAAATGCGGCCTTGTAAATGGAGGAAATGGCGCGGGTTA

ATGCCCTGCTGCTGCTGCTGTCTGTCGGGGCATAATCAGCGCAACCAATGAAGGCGAGGGTTCCATTT  
ACATTTTCCCTGATAATCTGATAATGTTTTACCACAGTAGTCCCTTTACCTCTTTCCAGCA  
GTAGAGGAGCCTTTTTCCTCCCTCTTGTAGTTCCTGTGACGCAGACAAGGTTTCTCTGTGTA  
GCCCTGGCTGCCTAAAACCTTGCTCAGTAGCAGGCTGGCCCAAACTTACCTGCTCTCT  
CTCTCAATTGCTCGGACTAAAGGTATGTGCCGGCACCACCATCGGTTCTTGTGTTGGGTTTT  
TCTTAAACCCTAGGTTACACAACAAAGTATTTAAATATTTCTGTTGGCGTTGTTGGGCAAA  
AAACAGATTTTATTTATTTTATTTTATCCAGTGCCTCTTCTGTAGGCACCAATAATGC  
ATGTTATTCAGGTTGGGGAGGGGAGAGAATATCTTCTTTA

**Eif2s3y:**

ATACTGATAATATCAGGAAAGAAAATAGTAGAAGATAGTCAGAGCAAGGGAAAACCTTGC  
TATTACAAAGAGAACAGGGATCTGGAACAGCCTGCGTCTTAGCATCATGTAGAAGGAGTG  
GGGGAGGTGAGAAGAGCCTGAGAGCTTTGAGATGTAACCATTGATATAACAATGGAGAGC  
CATGTCCTTTTTGTCTAGTCAAAAACAAAACAAAACAACTCCTTTAGGTGGACAGGAACTA  
CTTGGTATTGCAATAAGCAAATTTGTTATGCTTTTTTTCTTAGGGAAGACTATTTCTTTCCAC  
TCTCTGCTCAATTTGCGCTGAGTTCTTATGCAAAGTTTAGGCTTCATGAGCTTTTTCTCC  
TCCTTGTTCTAGGTCTTATTTGGGTACTATATTTGGAGAGATTTCTAGGGTGTCTTATCTG  
ACATTTCTAGGAGAAAATCTCATAGAAAAAAAATCTGCTATAAAGCTCACCTGCTATTAG  
ATGACTCAGCTTTTGAGTTGGTAGACAAGGAATGACTAACAGCTCAAAAAATAGGAGTAG  
GTGCAATTCAAGAAGTCAAATGACTTTGAGTTTACACAAGATTATTTTGATAGGTTATCA  
AAATGCTAATGCAACTAAAGCAATACAGTACACTTACCTATATCTTCAAAAAAATAAT  
GACTGTATTAATCAATATTTATAAAGTATACTGAGACAATAAGTCAAGTTATATTTCTTAAT  
TTCCAAAAAAATCTGTAATAAGCAAAAATATGATTAATAAACACTATCAAAAATAAGAT  
CAATAAAGGTTTTCTCTCTCTCTCTCTTTTTCTTTTAGGATTTTATATTTCAAGGATGCTC  
CATGTGACCACAAGTACTACCTTAAACTTCTGATCCTCCTGCCTCTACTTTTCTTGATG  
TTAACATCACTAGGAAACTAAAACCTGCAACAAAGCAAAGCACTTTAACCACTGAGGTAT  
ATTTTATAGTTCCAAGTATTTCTTTTTTTTAAACATTTATTTATTTATTTATGTCTAAGTACAC  
TGTAGCTTCTTTAGATGCATCAGAAGAGGGCATCAGATCTCATTATGGATGGTTGTGAG  
CCACCATGTGTTGTGGGATTTGAACTCAGGACCTTTGGAAGAGCAGTCAGTGTCTTAA  
CCACTGAGCCATCTCCCAGCCAGCTTCAAGTATTTCTTAAGCATAAAATTTGCCCTACCT  
TGTGTTTTGTTTTCTTCTTTTTGCTATTTAGTTTTTTTTGAAATCATGTTTATAAAGTTCA  
TGTTGCCCTGAAACTTGCTATGCAGATCAAGTTTGCCATGAACAAAATAAATTTCCAGGAC  
CCTGTATTAGGATTAANAACCATATTTACTTTAAAAAAAAGGTTTACTTATTATTATA  
AATAAGTACACTGTTGCTGTCTTTAGACACACCAGATGAAGGAGTCAGATCTCATTACAG  
ATGGTTGTGAGCCACCATGTGTTGCTAGGATTTGAACTCAAGACCTTCAAGAGAGCAGT  
CAGAGCTCTTACCCAATGAGCCATTTACACAACCTCATATTTACTTTTTAAACAGATATTT  
GCCTCTAAATATTTTACCAAAATAAATATAAATCAAAATATAGATATAAATAATAGTTAT  
TCTATTAAGCAGTTTTTTTTATTTGTTGTTTTGTTTTGTTTTGTTTTGTTTTGTTTTGTTG  
TTTTGTTTTTTTCGAGACAGGGTTTTCTCTGTATAGCCCTGGAACCTCAGCTGTAGACCAA  
AATCCGCCCTGCTCTGCTCCCAAGTGCTGCGTGTGCCACCACGCCAGGCTCTTTTTGTTT  
TGTTTGTGTTTTGTTTTGTTAGTTGTTGTTGTTGGGTTTTGTTTGTATGTTTCTTGTCTCT  
CTCTCCCTCTTGACGCCTGCCTACCCTCCCCTTTTCTCGGTCTCTCTCTCTCTCTCCG  
TCTCTCTCTCTCTCTCTCTGTCTCTCTCTCTCTCTCTCTCTCTCTCTCTCTCTCTCT  
TCTCTCTCTCTCTCTCTCTCTCTCTCTCTCTCTCTCTCTCTCTCTCTCTCTCTCTCTCT  
TCGCTCTCTCTCTCTCTCTCTCTCTCTCTCTCTCTCTCTCTCTCTCTCTCTCTCTCTCT  
TCTCTCTCTCTCTCTCTCTCTCTCTCTCTCTCTCTCTCTCTCTCTCTCTCTCTCTCTCT  
CCTCCGTCCTCCGTTGCTCTCTCTCTCTCTCTCTCTCTCTCTCTCTCTCTCTCTCTCTCT  
TCTCTCTCTCTCTCTCTCTCTCTCTCTCTCTCTCTCTCTCTCTCTCTCTCTCTCTCTCT  
TCTCTCTCTCTCTCTCTCTCTCTCTCTCTCTCTCTCTCTCTCTCTCTCTCTCTCTCTCT  
GTTTTTACAAGTTCTTTTTGTTATTTATTTCTTTGTTCTTAAACGATGTAATAAATCTTACC  
GTGTGCATATTAATGAAGCTCTCCAGTTTTGGTATTTTCCCTGCTCTGCAGGTACCT  
AATCTTACCACAAAATCCACAGCCGCTTGTGTCCAGAAAGACCAAAAATACCTTCA  
AGTCAATCTAGATGATTAATAACTAAATATCATCTGAGCAAATAAATTAGGTTAGGGTT  
AGTAAAAGAAATCAGAAAGTAATCTGATCGCTCACATTAATAATTCAAGTGTCTGAGACAC  
TAATGGAACCTAAAACAAGAGGCTACCTTTAATCCCGCCCCGTAAGTTGGGGGTGAGGGTA  
GGGGTTGGGATGGAGGTTAGGATCGGGTGGGGCTTTTCACTGGGGCTGCCCTTGACGTTGC  
CTGCACTAATAGTTATGAAGTCCATGGCAAGTAGCTGTTGAACTTTATATATGTTTTTT  
AGTAAAGTTTCGTACAACCTCAATATACAAAGTCACTCAGAGATAAAGTCCCTCGTAATAAGGC  
TACACTATGTTTTACTGCCCTTCTTCCAGGCCAGATCTTAGTCACTGCTTTAATCCGCC  
ATTTTACAGCCCCCATAGGCTTGTGCGTTTTGTTGACGCGACAGCGGAGGCCACAGCC  
ACTTCTTCTTTTCGTGAGCAAGATGGCGGGCGGAGAAGCCGGTGTCACTCTCGGGCAGCC  
GCATCTTCTCGTCAGGATCTTGCCACTTTGTGAGATTTTCTTCTCTGAACTGCTATGT  
AAAGTCCATAGTGGGAAAGCGTTGGGTTAGGTTGTCTGGCAGTTTTGGGGCGCGAGA  
AAGGAGACCGGTGATACCGACTGTATTTCAAGTCAAGTACCAACCTGGAACCGAGAGCT

TTGCTGTTGAGGCTTTAATAATGATGTGGCTTTTTTTTTTTTTTTTTTAAACCTCAGACGGTTTGAGA  
GGGGATCATATGATAAACAGTTTAAACGTTAATCTTGTTATAAATACGTGAAAAAAGTT  
TTTACCTTCGTCGAAGTCCGCGAGCTCTGATGTAGTGAACCTGAATTGATTTTGTACGGA  
GAATAATGTTCTTTTTTTAGTTTTCTCGACCGCTAAAATCCTTTAAAGATTGCTACGAAA  
ATGTACCTCCAGAACATCTGTTTCTCTCCGTACATTTCTAAAAATAATTTAAAAAGTAAG  
ATAGAGACAGGAAAAACCCCTTTAAAAATAGGATCAGGAAGGAGATGTGTATTTGTAACC  
CATGCGTTTATAGGAAAACGTTGGTTTTCTCTGAAAGGCAATGGTCTTAAAAATGTCTCCT  
TGCAGGATGTTACCAAGTTGACTCCGCTTTT **CACGTC** AAATTATCAGCAGACAAGCCACAA  
TTAATATAG **GTAAGAACA**ACTGTTAATTGGTAGTTGAAACTATTCTGATCTAATTGTTGA  
TTATGGCAATAGATAATTCTGTATTTTTCTTTGAAGTTATCAGACTCCAATTGTCCAGTT  
AGAATGCTACAGATCTTGTAAGAGTAGTTACCTAAAGAATTCCCATCAGATATCCAGAA  
ATCACAGGAATCTGGAAGCTGACATCCTCGAGACTTGGGTGTTTTAAAAAGGAACTTTTG  
GAAGATAGATAGGATCTCACTTTGTAGTCTTGCTTTGTAG

**Emr1 (Ly71) :**

TCCCTCCCATTTGATGCCAGATAAGGCCATCCTCTGCTACATATGCAGTGGTGCCATGGG  
TCTCTC **CATGTC** TACCCTTTGGTTGGTGGTTTAGTCCCTGGGAAATCTGGGTGTGTGTGT  
GAGGTTGGTTAATACTGTTGTTCTTCTATAGGGTTGCAAACCTCCTTCAGCTCCTTCAGC  
CTTCTCCTAACTCCTCTATTGGGGGTTCACCTCTTCTCTTCTCCCTCCTAGATCTCTC  
TTTTCTCTACTTCCCATGATTATTTCTTCCCATTCTGAGTAGGACTGAAGCATCCACA  
TTTTGGTCTTTTTCTTCTGGGAGTCATATGGTCTGTGAGTTGCATCATGGGTATTTCTGAA  
CCCTTTTTCTTTTTGGCTAATATCCACTATCAGTGAGTATAAA **CATGTC** AGTTCTTT  
TGTGACTGGTTACCTCACTCAGGATGATATTTTTCTAGATCCATCCATTTGCCCTGCAAA  
TTTTCATGAAGTCAATATTTTTAATAGCTGAGTAGTACTCCATTATGAAAATGTATCACTT  
TTCTGTATCCATTCTATGTTTAAAGGATATCTGGGTCTTTCCAGCTATTACAAAATAAGG  
CTGCTATGAACATAGTGGAGCATGTATCCTTGTATATGTTGTAGCATCTTTGGGTATA  
TGCCAGCAGTGGTATAGCTGGGTCTCAGATAGTACTGTGCCCAATTTCTGAGGAGCC  
ACCAAGCTGATTTCCAGAGTGGTTGTAACAACCTGCAATCCCACCAGCAATGGAGGAGTG  
TTTTCTCTTCTCCACACTCACCCTCAGCTACTGTACCTGAAATTTTTGATCTTAGCCA  
TTCTGATGTAGTGTGAGGTGGAATCTCAGGGTTGTGTGATTTGAAATTTTTCTGATGACTA  
AGGATGCTGAACATTTCTTTAAGTGCTTCTCAGCCATTTGAGATTTCTCAGTTGAGAATT  
CTTTGTTTAGGTCTGTATGCCATATTTAATAGGGTTATTTGGTTCTCTGGAGTCTAACTT  
CCTGAGTTCTTTGTATATTTTGGATATTAGTCCCTCTATCAGATGTTGGGTGGTAAAGAT  
TTTTTTCCCCCAATCTGTGAGTTGCTGTTTTGTATATTGACAGTCTCCTTTGCTTTACA  
GAAGCTTTTTAATTTATGAGGTCCCATTTGTCAATTTGTATCTTAGAGCCTGAGCCAT  
TGGTGTTCGTACAGGACAAATTTCCCTGTGCCAATGTGTTGAGGTTCTTCCCCAT  
TTCTTTCTATTAGACTCAGTGTATCTGGTTTTATGTGGAGGTCCTGATCCACTCGGAC  
TTGAGCTTTGTACAAGGAGATAATGAATGGATCAGTTTGTATTTTTCTACATCCTAACTG  
CCAGTTGGAAC TAGCAACATTTGTTGAAAATGTTTTTTTTTTTTTCCCTCACTGGATGACT  
TTGACTTCTTTGTCAAAGATCAAGTGACCATCAGGTGTGTAGGTTCACTTTGGGTCTT  
ACAAATTTATCCATTGATCTACCTTTCTGTATTGTATCAATACCATGAAGGTTTTTTTA  
AAAAAAATTTTTTTTTAATCATATTGCTCTGCAGTACAGCTTGGGTGAGGATGGTGATT  
CCCCCAGAGGCTCTTTGATTGTTGAGAACGGTTTTTGTCTATCCTGGGTTTTTTGTTATCT  
CAGATGAAATTTGAGTTGGGATTTTGATAGGGAATACACTGAAATTTGTAGATGCTTTTGG  
CAAGATGGCCATCTTCCATCTCTGAGTCTTTGAGTCTTTGATTTCTTCTCAGAGACTTGAAGT  
TCTTGTACATACAGATCTTTCAATTGCTTGGTTAGAGTACACCAAGATATTTTATATTAT  
TTGTGACTATTGTGAAGGGTGTCAATTTCTCTAATTTATTTCTCAGCCCGTTTATCCTTTG  
AGTAGAGGAAAAC TACTGATTTGTTTGAATTAATTTTATATCTAGCCACTAAGCTGAAGT  
TGTTTATCAGCTGTAGGAGTTCTCTGGTGGATTATTTTTTAGGGTATTTATGTATTCTA  
CCACATCATCTGCAAAATAGTGATATCTTGACTTCTCCTTTCTAATTTGTATCCCTTTGA  
CCTCTTTTTGTTGCCTAATTTGTTCTGGGTAGAACCTTGAGTACTATATTAATGATAGGG  
GAAAAGTGGACAGCCTTTGGGTGTGGTGTGTGGTATGGTGTGCTGTGTATGGTGTATG  
ATG **CATGTC** GTGTGTATGGTGTGGTGTATGTTGGTGTGGTGTCTGTGGTGTGGTGTAAAT  
GATGATGGTGGTCTCTCTGTCTCTGTCTGTCTCTTTCTATCTCTGCCTCTCTCTCTGT  
CTCTCTC **TGCCCTCCTCTGTCTCTC** CTCTGTCTGTCTGTCTGTCTCTTTGGTGTGATGTAT  
GTGGTGTGTGTGATTCTACAAGGTTGACATGATGACAGAATTTAATTTCTTAGCAGCA  
AGCTCATGGATCCTGGTGATAAATGCAGCATGACTTTACTGAAAAGGCTTTGTGATCTTG  
AAGAGTGGATTGACTTCACTGTGGGCAG **CACATG** CAATCTCACTGTTTGGTGTAAATGAA  
AGAAGAGAATGAGAGGTGGAAGGGGGATGGTAAATGTTGAAAAAAGAATGGTACAGAGGA  
AACTGAGGTTGGAGAGAGATGGGGTAGTGGTAAAGAGATGGAGAAAAGGGAAGGAAATG  
GAGAGAAAAGACAGAGAGACAGAGAGAGACACACAGAGAGACACACAGAGACAGAGAGGAA  
GGGAAAAGGAAAGAGAAAAGGAAGAGGAAAGAG **GGGGAGGGG** AAGGGGAAGGGGAAGGGGAA  
GGGAGAGGGAGAAATGTGGACACTAGCCAGATTTAAGGGAGAAATTAGGGGGTTGCCAGT  
CTGTCCACCTCTGATGGTGGCAACTCAGCAGAAAGCTGCTGGGCTCAGTCTGGCTTTGTT

GAGCAACCCCTGACTCCACCCTTTTCTTCCCAAAAGCAAGCTTTTAAAGGGAAGGCTT  
TCTTCATTGAATGACTGCGCACAGTACGATGTGGGGCTTTTGGCTGCTCCTCTTCTGGGGT  
GAGTATGAGGTTGAATGGGGCATGGATGGCTGAGGTGTGGGCTGGAAATAGGTTGCAGGG  
AGAAAGGCCAACCTTGGAGGGGTTCGGCCCATAGGCTAATGTCTATTGCACACAGCAAAC  
TTTACCTTGGGAAACCTTTGACAAAATTCCTTGACTTAGGGAAAGTCTATTACCAGGGTA  
GATCTTCTGTAGCTGTTCATGTGCGATGCTGTGTTTGTGAGCCATCTCAGTTTTAGTT  
AGAAATTAACATGGAGTAAACTTGTGAGGCTCCGGTGCCTGCATCTGGGATGGTGAAGG  
GGGATGGAAGTCCACACAGCAATGGAAACAGTCCCCTTACCATTGCGTAGCCCTTTTTTTA  
TCAGCCATAGCTCACAAAGCAGAACATGGGTGTGAAAGAGGTAACCTGCCGGGCTTTGGC  
AACAGTTTTAGTGTGTAAGTGTCTGTCTACAAGCACAAAGATCTGGATTGATCCCAGA  
ATTTATGTTAAAAAACCAAGTATGTGGTACACTTCTACCTCTGGCTCTGGAGAGTAGAGA  
AGGAGGATTCCTTGGTTCTTGATGGCCAGCTAGCCTAGCCCAATTGGTGGATTCAGATC  
AGTGAGAAAAGTCTGTCTCTAAACAATTAAGGTAGATGGAACCTGGAGAAAAGGTGTTTGGG  
TCATCTCTGGTTCTACATGCCAGTACACACAAGTGCATGTTACCTGCCACTACACAT  
GCACAAATGTCTGCACACACAACAAGTGCATGCACACAGACATGCAATGCACACACA  
AAAGGCACATGTACTCACAGATGCAAAAAGAAATACTGTGAGCAAGTCTTAGCTAATG  
AGGGGTAGAGCCACGGTATAAAATCATTCAGCTCTGGCCTTGTTCAAACTCTTAGTCAT  
GGCTGTTTGTGCTGTGGGAGTCAGCGAAGATAGTCCCCT

**Fcgr2b:**

TCTCTAGTATCTACTCTCTGCCCTTGTAACCTCCCTCAATAAAAATACACAAACAACA  
AAAACAAAACAAAACAAAACAAAGCATAGAAACCTCTCACAGAGGAAGCTGTGGTGTGCCA  
CAGTGTGTCTGTCCCACAATATACCTCTTGTCCACACATCTTCACTTGCAAATGTTCCAC  
TGCAGTGAGTCATTGGTCTGGTCTGAGGCTCTGGCTTCTGTGACACCATCAGTACTGGA  
TCCTTACCGCGACTCCGCCTTGTTATCCTGTTGTTGCCCTGTGTGATGGAGATCCTGCAG  
CTTTGGATCAGCAGGACCAGCCCTTTTGCAGTGCACAGCAATTCACAGTTCACAGTGA  
CGGGTGGGCGCGGTTCTGCACATCACCTGGGTAGCTGGTGGCTGCCAGACCCAGGACAA  
CCTCATGGTCTCTAGTGGCAATATAGGCCACCGATACTGACATCGACCCCTGCCACTGCT  
TAGCCACGGATCCAGATCCAGGCTCTCAGCAATAGCATGGGCGGGGACGTCATCATGGCC  
TCAGTGGGGGCTGGCTATTCCACAACAGGCTTTGCTCTCTCTCCCTTAGTCTCCAG  
TTCCATCTTCCCTTACAGTACTCAAATGACTCTACTTCTCTTCTCTCCCATCTGTGCAC  
TACACACTTGCACATTGTAGTGGCTCCCACTCCAGGCAGGGCATGTGGAGAGCCTC  
TGGGTGAACCTGCGCTGCACAGCGTGGCATGGCTTGGTCTATAGCCTCTCCTAAGGCATG  
GCAGCAGAGGGTCTATGGCTGGTTCCTCCCTCCCTCTGTACCACGTAGCATGGAG  
TCAGGCAAGCTTCTGTGTGACTACGGCTGGGTGCCTGAAAGGAACGCTGGGGCTGTGTGG  
GAGGGGTGGCAAGAGAAGAATGAGACCAAGACAAAGTTTCTGATCAAGGCCCGATGTTTC  
CTTTTGAATCTGAATCTAAAAGGGGGGAAGCCCATCTCTACTATGCCAGGATCTCGT  
GGCTTGTCAAGAACTCACAAAGCTCAGCCTCTCAGCAGGTAGTGGCATCTTGGAGAAGCT  
GCAGATATGGCAGGGCAATAGTCTTTACCTAGGTGCGAAGACTCCACCCGAGGTGGAATA  
GCCGGCTGTAGCATAAAACAAGGTCTAAATCAGCCTCTCAAGGCTAGGGGAAGGCACACAG  
AGCCTTCACACAGAGTAGCAGCAGGCAGGCTCTGAGGATATCTTCCCTCTCTCACGCTGTT  
CAGGCTGATCATCATGGCAGGCAGGCAGGACTCTGTCTGCAGCCTGTCTGGGCTTTGTGGT  
AGAGAGCAGATCTCGGGGCTTTTCCCTGCCAAGCACCAGAACTGGGTGGCATGGTGGTTG  
GCAGGCTCTGATGTCTCCCGGTTTACTTTTAACTCTACTGCCATCAGCAGCTCT  
GGGTGACACTCGCATACCTCTTGTCTACTGACCTCCGACAGCAATCAATGGTCCCAGT  
CGGAGGTAAATCAGGATGCTCTCTATTCTAATGATATATTTAAAGTACTGATGTCATCCC  
ATTGCTCTCTTCCCATAGGTTAAAATTCAGATAAGAGCTGGCAGGGCGGGGCTGGGAGA  
TGAGATGGCACCTGTAGTAAAGTCATAGGGTAGATAGGGTGGAACTGTTGAAGGTTTCTG  
AAGACCACAGAGTGTAAAGATGGTTTTATAATGTCAATTCCTTTACTATTACAGCATGCTT  
CCTGACAGAGCATTTTGGAAAGAGGCTCAGAAGAGCTCCCCAAAACCTGGTCCCCAAAAT  
TGCATCATCTGGGGATGCTGACAGGAAACAAAGAAAACAAAATAGGATCCATCCGTGAT  
ACATTCATAGTCTTTTTTTTTTTTCCCAAAAACCTCGAGTACAGTTGATCTTTACCAG  
TGACAGTTTTTAAACCCTTGTGTGGGAGGAATGTTTACTAAAGCCTTAAGTCTCTTTTTT  
TTCACGACCAAGAGAGATTTTTCTGCGACCTAGTGGGTAGCAGCAGGCTGTGTGCTAAGC  
ATTTACAGTGCACAGGACAAGCCCTCACCAGAGTTATGTGACAGCCATCCTGGCACTGC  
ATACCTGCAATCTCAGTATCCTGGAGACTGAGGGTGGAAAGAGCTCAAGCTGAGGTTACC  
CTGGGCTACCCTGGGCTACACAGCCGGTCCAGGCCAGCCTGCATTATACAACAATACAC  
TTCTTTAAAAATGTTTTTCTGTCTAAAATGTCAATGCTGCAGAATCTGAGAAACTTTGTT  
CGAATGGGTAGAAATGTTGATCTTCAATTTACAGACCAGGGAGCCAGATGTTCTCAGAAG  
TCTGTGTGCCCAACTTGTCTTACAGCTTGGAAACCTATGATCTTTTATCATGCCATA  
GCAGTGAGAAGAGTAAGTAGTGCAGTGGGGCGGGGAGGGATTACAGGACTAGGGCACAGA  
CCGATGCTCGATAGGTACTTACAGAGGAGCGAGTGGAGAGGAATGTATGTGAAGGATGAG  
TGTTCTACTGCTGTTCTCACATATGGCCTAGCTTTTGGTCTACAATCCAACAGTGCAGCTG  
GGGATGTGATAACAGAGAAACCCAGATGGTGGTAAGTGGTGTGGGTACCTTTATTACAG



TTTCTGGAGGAGTCCAGATCCCACAGACTGGACCTTCAAGACTTCTGGCATCCTCCATCA  
CAGACTGAGGCAAATGACTTCTGAGCTGCGTGGGGTGAAGTTTTCCCTCTCTGTACCAG  
ACGTCCAGGTCAGCTACGGCTCCAGCAGAACATGAAGGGAGTTGTTTTCTCAGTGTCTAAA  
AAATTTTCTGTGATTTGAGCTGAATCCAGTTTATTCTGGTAAGTCTTGAGTCTTCTAATA  
GAGAACGGATGAAAGGAAAGAGGGTGGAAAGGGGAGGAGCCAGGATTTAAACAGACCGTTT  
CTTTTCACTTCCCACCTTTGGACTTCAAAATTTGTCTGTTCTCTGGGATCATATCTGCCAA  
GCCGGAGGGGAAAGCTTGGCTGAGCTGACTCGCTCCAGAGCTGATGGGAATCTTGCCG  
TTCTACTGATCCCCATGGAGAGCAACTGGACTGTCCATGTGTTCTCACGGACTTTGTGTC  
CATATGCTACTGTGGACAGCCGTGCTAAAGTAAGTCGGGACCTCCAGAAGAGAGGCAGGGG  
AAGGACACCTGGGTGGGGTGGATGAATCAGCCTGGCATAGGAGGCATGTGAGGAGTAA  
GTAGGAGGCTAATAGTTAAATGTAACAACCTGGTTGGCCTTTGAAACAAAATCAAAGCT  
GGCAGGAGTTTTTGTGTTTTCTTTCTTTTCTGTCTCTTGGTACCACCTTCCCCTCCTCTG  
ATCAAAATCTAGAGTCTAGACTGTAGTGAGCAATTAAGACACGTTTCTCTTTGAATC  
CGTGAATCACACAGGACCAAACTTAGGCAAGATGTCTAGTACTGTTTAAGCAAGGGCT  
GGGAGAAAGCTCAAGGATGCTTTTGAGGGTGGTGGTGGACACTTATTATATAAGGAGA  
GGTGCTGGAGAGATGGCTCAGTGGTTAAGAGCACCAGACTGCTCTTCTGAAGGTCCTGAGT  
TCAAATCCAGCAACACATGTAGCTACAACCATCTGTAATGAGATCTGATGCCCTCT  
TCTGTTGTGCTGAAGACAGCTACAGTGTACTAACATATAATAATAATAAAGATTAAAA  
AAAAAAGGAGAGGAGTAGGAAGGTCAAGGTTGACCTGGGAACCTGGGTTCAGGGTTTTCA  
TAAACATGGACAAGTCTGGCATTGTGAGTTGTGGGGCCAGAGAAATCTCTCATGCTTCCT  
TCAATGTGTAGCCATGGGACTGGTCTGGCCCTGCTTAGTAAGAAAGTCATGGTCAGG  
GCTTAGGCTGAGATGGAGGAAGACTTTCTGGTCTCATCTGTGGGCAGAGGACA  
GAAACTGATGGTGCCAGGTCATTAGCAGACTCTGGGTGAT

**Gamt :**

TTAAAAACAGTCATGGCAGTGCAAAACCTGTCTATCCCAGCGCTCAGGTTGGAGAGGAAGACT  
GGGAATCAAGGTCAGCCTCCCTTGGTCAGCTATATAGTGAACCTAGAAGCCAGCTGAGGT  
ACACAAGACTTTCTCAAACAAAACCAAAACATACATACAAGAAAACAAAACAAAGCCTGA  
AGCAGGGCAGTATTGGTGCACACTTTTAAACCCAGCAGCTGGGAGGCAGAGACAGGCTGA  
TCTCTGTAATTAAGTACAGCTAATATAACAGATGAGTTCCAGGACAGCCAGGACTACAC  
AGAGAAACCTGTCTAAAAGGAGAAGGAGAAGGAGAAGAAGAAAAGAGAAGGAGGA  
GGAGGAAAAGGAGGAGGAGAAGGAGGAGGAGAAGAAGGAGGAGGAGAAGAAGAAGAA  
GAAGAAGAAGAAGAAGAAGAAGAAGAAGAAGAAGAAGAAGAAGAAGACGAC  
GACTTTGAATTTGAGAGTGACCTGGGTCTTAGTCTCTATGTGAGTAAACATAATATAAT  
AACAGCAAAGTATAACAAGCAACAATTCATTTCTGTGCTGGGTATAACAGCTCAGATTAT  
AAAAAACAGTCCAAAGCTTTTGTTTGGAGACAGAGTCTTCTATGTAGCCCCAATTTGTC  
TGGAACTCATAGAGACTTTGTCTGTGCTGACTCTGGAGTGTGAGATGACAAAGCTACCC  
ATTTTCTGCTTTAATTAGACACATGATCATCAGAAGGCCACTCAGAGGAGGTGGCGCA  
GTGGACCTAGAATTCAGTGGGGGAAAGTGCTCTCCTGGCAGGCACAATGCCCAAGACCCTT  
CATGAGCTGCAGAAACCGGGCATAGCAGTACACATTTGTTGATCCTGGCACTGGAGAGGTG  
GAGGAGGCAGGATCTGGAATTCGAGGTCATCCTTAGCTGTGTGAGAGTTTGAAGCTATCT  
TGGGCTACATGAGAACCCTGTTTCTCCAGAAGACCAAAGTTTGATTGTGAGACCCAAAGT  
GGGAAATCACAATGCCAGTGACTGCGCCTCAGTGGTGTGCACAGGGATGAGACACCAAGTA  
CATTTAAAAATAAAAAACAGCGGGCGTGGTGGCCAGGCCTTTAATCCAGCACTCG  
AGGACAGAGCTATAAAGAGAAACCTGTCTCGACAAACCAAAAAATAAAAAATAAATAA  
AAAACAAACCAAACCTCCAAAAGTGCTAACCTGTTGCGGTTCTAAATTTGGAGCCCTGGTC  
TCCACTCCTGTTTTTTAGCAGTTTTTCCCACCTGTAAAATGAGGGCACCAACAGTTATTGTC  
TGTAACATCTTCTAAGGATTAAGAGTGTCACTGCTTTTCCAGCAGTTCTTAGAAAAATCA  
TCAGATCGCTACACCTAACATGTGCAAGTGACCCAGTAGTAAGCTAGAGCTGCTGAATGA  
CAGGATATGGATTAGAGCAGTGCAGAGAGGGCCGGCTTCTTGGACCTCACACAGGCCAATGA  
ATGCTAAACTTGAGGCATTCAGCCAGGCATGGTGGCATAAGCCTTTAAATCCAGCAGT  
TCAGAGGTAGAATCAGGCAGAAATCTGTGAGTTGCGGCCAACTGTTCTCAATAGCAAG  
CTCCAGGCCAGTCCAGGAGCTCCTGTCTCTAAATAAACCGGATAAATAGAAAATAAAAAATC  
AACTTGGGCCGGCCCTGGTGGCGCACGCTTTAATCCCGGCACTGGGGAGGCAGAGGCAG  
GTGGAGTTCTGAGTTGAGGCCAGCCTGGTCTACAGCGTGAGTTCCAGGACAGCCAGGGC  
TACACAGAGAAACCTATCTCGAAAAACCTAAAAAATAAAAAAAAAAAGAAATCAACTTAG  
AGGAGCATCGTGGACGACAGCTGAGATCAGGAAGTTTACAGCCTCTTCAAACAGTAA  
TCCAGTACCCTTGCAGGCCAGCCAGGCAATGCAGAAATGCAAGCTCATTTCAAATATGTG  
GTGCCAGGGAGCTTGCCCCGCCCTCCAGAAGCCACAACAGTGCACCTCCAGCATATGG  
TACTCTCCATGGCACTGGGACCACTGGTAGTCTCTAAACGTCCTCTTGCACCCGAGGC  
ACTTCAACCCCTCATGGCTCCAACCTTCTGCTAGATAACTTGGCCCCGCCAGGTCGCGA  
GGCTCCGCCCATTCATAGTAAAAGGATGGACTCAGCTGGACTCCACAATTACCCTATCC  
TCAGGCCCGCCTCCTTGGCGCCAGCCTCAGCTCTAGCGGAAAGCTAGGCCCGGATCCT

TTTGTTCCTACCCAGGCTGGGCCCCACCCCGTGAAGAAGACTAGGCTTCGCCAGTAGCA  
GAACGCTTGGATTTTCATCCTATCCCATAAAACCTACCCCATGGCTCTGTCTCATCCGT  
AGCAGAAGGCTGGACACCACGGTCTCAGCCGGCTGGCCCCGTTTCTTAGTTTCGTCTCTC  
ATACTTAGCAGAATGGTGA **CCCCACCCC**ATTGCTCCGGCCCCGCCCTAGCAGAAGGCTG  
GACTCTGTCTTACCATAACAGGCTCCATCCTGTATGGCTCCTGCCTGCATTCTCATAGAA  
GTCTGGATTTCTGCCAACCCACAGCTCTGGCCCCATCCATAGCAAAAAGATTGGACTCTC  
CCCCAGTCCACAGTGCAGGACCTATCCATTTCCGTAGATCCGCCCTCAGAATTTTACT  
TTGGGCTCCAGCGAGTAGCCCCGACCGTGAGCACGCTCCACCCTGTCTCCTCAGTCCATC  
CACCCAGGCCAGCCAGTGCAGGCTGGACCCCCCTCCAGAGCAAGGGCCAACCCCTCTT  
CTAATGACTGGACCCACCCTAGCCAGAAAAGCCCCGCCCCAGCGAGTAGGCCCCGCCCA  
CACGGCTCAGCCACGGAGTTCTTTAGGGCGCATAGGCC **CGCCCCCG**CTCAGGCTCCCA  
**CCCCTTGAGTGCAAGGCTAATCTCTGTGCAGAGGCACCGCCCCACTCCGCCCTCCACCG**  
**CCCCGCGCTCCGACGCCCTGCGCTCCCGCCCTGGTTTGCAACAGCTCAC**ATGAGCTCT  
TCTGCAGCTAGCCCGCTCTTCCGCGCCGAGGACTGCGGCCCGCGTGGCGCGCGGCC  
CTCCGCGCTATGACGCGTCTGACACGCACCTGCAAACTCTGGGCAAGCCAGTGTATGGAG  
CGTTGGGAGACCCCTATATGCATGCGCTAGCGGCGGCTGCTGCCTCCAGAGGTACTCTG  
CCAGAGGAACTGAGGCTGCAGCTTAAAAGAGCAGGAGCTCCCATGCATGTTGCAAGTCT  
CAGTTTCTTGGCTGAGGCACTGAGCTGCCTTGGGGCTACCTTGGTTCGGGAAGGGAAGG  
TATTTGCAAAAAGTGGACGCAGGAAAGAGGTCCCGGCTCCGAACTGGAATTCCTCTCCC  
AGGGAAGATTTCTACTTCCCGGGCTGGGTCTTCCGACCACAGTGCAGTGGAACTTAATA  
GAAAGCGGAAAGAGCAGAGGGGCGTGAGGCTGTGCTTGTTCGGGAACCTCCGAGTCT  
CCAGGGGCTGTGTGCTAAGAATAGCTTGGGAAAACCTGAGCAGAGAGGACGCTTCCCGTG  
CTGTGGCCCTGAACTTCTGTACAAGGGGTGGTGTCTGAGGCACCCAGCTTCAAACAGGG  
CAGATGGGCAGTGAAGTGAAGTGAAGTCAAAGTTCACCCAAGGCAAATGAGGACTTGGTAT  
TAGGTGCAGAATGAAACGTGGAGGGGCTGCAGGTGTAGAGCCTCCAAGCCAGGCTTGGCC  
CTTTCTCACAGATTAGAGCACAAATCGCGTGGGCAGGGGCTCAGAGTCCAGGGATCCCTG  
GGCCAGGCCCTGGGCTCCAGGCTAGCCGCTCTGATTGGCAGCTGGCCCCGAGCCACAC  
TCTGCTGTTACTTTGTTCTGTCCACC **CACATG**GTCTCTGCT

**gdf3:**

ATTGAACTCAGGACCTCTGAGCAGCAGTCAAGTGTCTTAAACCGCTGAGCCAGCCCTCCA  
GCCCAGGTTCTTATAATAGAATAAAAGAATAAAATAGTTCAAAAATATTACATTCAGTTT  
CAAAAACCATGAGCAGTGTCTTGGGGACAGACTAGCCAGTTATCTTTACAGTAAAAGTGG  
TCAGACCTGGGGCCTTGACACACCAGGCAAACCCCTGGAATTAACCTGTCTGGCAGTTTAA  
ATGAGTTAGACTTTCAATGGACTCTGAGAGTCTTTCTAGTCAAGTTTTTTTTTTGGGG **GGG**  
**GGGGCG**GAATAACAGTCAGAAATTCGCTGGGGTGGCAGTGACCCCTGTAACCCCACTACC  
TGGATGAGAGAGACAAGAACATCACCAAGTGTGAAGCTAGCCTGGACCACACCTAAAG  
TTCAGGAAGGTACTGAGAAGATGGCCAAAGTTAAGAGCACTTGTCTTATAAAAAGACT  
CCACTTGGTTCCCGGAACTTGCATGGTGGTTCACAACCATCCATAAATTCTAGTTCCAGGA  
GATCCGATGCCTTCTCAGACCTCTTTTGGCACAGACATATAAGCAGGCAGCACCTACAT  
ACATAAAAATAAACAGCTCTTAAAGCCACAGCAATGTAAGAAGATCCTATCCAAAAACAA  
AATAATAATAATAATAATAATAATAATAATAATAACAACAATCCAGGGGTACAACCTT  
TTTTTTTTTTTTTTTTTTTTAGATTTATTTATTTATTTATATGTAAGTACATTGTAGCTGT  
TTCAGACACTCCAGAAGAGGGAGTCAAGTCTCGTTACGGATGGTGTGTAGCCAC **CATGTC**  
TTTCTCTGGATTTGAACTCTGGACCTTCGAAAGAGCAGTGGGTGCTCTAACCCACTGAG  
CCATCTCACCAGGCCAGGGGTACAACCTTTAATCCGCACTCA **GCAGGC**AGCAGAC  
AGATCTTTGTGAGTTCAAGGGCAGCCTGGTCTACAAAGTGAAGTCTAGGACAGTCAAGGGC  
TGTTACAGAGAAACCCCTGTTTTGAAACCAAACAACAAGCCCAACCAACCAACCAAC  
CAAAGCAGCAGCAACAGCCTTAAGTGTATGTTTTGCTGTGTAGAGACAGAGTTCATGGC  
CTGGAACCTTGCTAGGTAGCAGAGGATAGCCTTGAACCTACGACTTGCCTGCCTATGCTGG  
GGCCACTCCCCCTTCCACCCTGTGCACAAATCTGTGCTTTTTCCACAAAAGCTCCTTTG  
GGCAGTGTGAGTCCCAACCTCGGACTCCGACTGGTCCCTCAACCCGTCTCTGAAGCA  
AATTTGTTGGTCTTAGCTTTAGTTGAGACAAACATTCAGTGAAGGAAATGAAGAATTTGA  
TGCTGCCCAGGTGATAACCGATGGGACCAGAGCTCACCCAGGACTGAGATCCTAGTCAA  
GAAGAATTTGGTTAGACACTGAAATCTAGAAGAGGAATGTAGGCTTTTTTTGTTGGGTCGG  
TTGAGACAGGGTCTCATTTTTGCAGCCTAGGCAGCCAGGAACTTCAGAGGCTTTGAGGTTCT  
TTAACCTGTGTCCGCCTCCTAAGCAGCTGGGATTTGTTGGACTGTAATCACTAGGCCTGGT  
TAAAACATCTCTTTTTTTTTTATGTTGGGATTTTTTTTTTTTTACAGTGTATCCAGGAT  
CTTAGATATCCAACTTACTGACTACACTGCCAGTTAGTGTTTTTTGTACTTAGACTATGAG  
TATAAAAATTATAAAAATGATTTTTATTGTTTTTTAATTTTTGCATAGGTTGTGTGCCCTGCA  
TATGGGTATGTG **CACATGTC**GCAGGTGCCTGCTGAGTGAAGCCAGATGCGTTCATCC  
CTGAAGACAGCTATAAGCTGCCAGATATGGGCTCTAGGAACCAAATTTGGCTCCTCTGGA  
AGAGCAGCAAGTGTCTTTAACCCTGAGTCTCTCTGCATCCCAAATAAGAGAATCATA  
GTGAACTGGGCGTGGCAGCACACTGACAGCTCAGTCAAGTTTTCTGGACAGTGTGGAAG

GACTACTCTAAACCAGGATTCTGACTCCCTGCGGAAAGATATAGCAA **CCCCACCC** CACTCT  
AAGTTAGGTCCTCAATGTAGCTCAAGCTAGCTTCAAACCTTGCTATATGATTGAAGTTGGTA  
TTATATTTTTATTTCTTCTATCTCTGCTTCTGAGTACAGGGATAAGAGGTTTGTAAATTAG  
TTCTTGCAAGACACCATTTCTGGAAGGAAGGAAGGAAGGAAGGAAGGAAGGAAGGAGGGA  
AGGGAAGGGAAGGGAAGGGAAGGGAAGGGAAGGGAAGGGAAGGGAAGGGAAGGGAAGGGA  
AGGAAGAAGCAATCGAGAGAGAGAGAGAGAGAGAGAGAGAGAGAGAGAGAGAGATGTGAGAG  
ATTGATTGATTACAGGGCTAGGAGTGACAGAGATGCCTTGCTTGCCTGCTGTGTTCAGCCAG  
AGTTCATACCATGCATCTCATCCAATCTCATTGGGAGCGATAGGTAGACTAGATTAGAA  
GTTCAAACCTTGGGCCAGCAAGGTGCCCCAGTGGGTAAAGGTGCTTGCCACCAAGCCTGAT  
AATCTGAGTTCAATTCCTGGGACCCATTCGGAAGACGAGACCAACTCCTGCAAATTGACC  
TGGGAGCTCCGCCCTGTACTGTGGCATGCATAACCCACTCACAGGCATAATAAACAAAC  
AAACAAACAAACAAACAAACAAATATCTTGTTAAAAGAGAAAACAAGTTGAAGGTCAATCT  
AGGACACAAGAGACCCCTCTCAAATTAACATATAATAAATATTCTCTACTGTGCTC  
CCAGAAGTTATCTTATTGCTTGCATATCACAGACACACTAATGTCTGTGTGTTGAATGA  
GTGTGCTTCCTTTTACTCACGCTGTACACTGCTGACCAACCCCGGGGAGTGAAGGA  
GAAAAACACACACACACACACACACACACACCATCTGTCTTTTTCATTGAATTGCCTC  
**TGAGGGGCTGAGAAGAGAGCAATTCACACTTGATTAGCTCCAGGCTCCTGAATTGAGAG**  
**AGGAGGCTAGACCGCTGAGCTGCGCACCCAGAGGCTGCTCTACCTGGCTCAGACGACA**  
TGCAGCCTTATCAACGGCTTCTGGCGCTTGGCTTCCCTTCTGTTAACCTGCCCTGGGCCA  
GACATCCGAGTTTCAAGACTCTGACCTTTTGCAGTTTCTGGGATTAGAGAAAAGCGCTTCA  
CCTCACAGTTTCCAACCTGTGCTCGCTCTTAAGGAAAATCATCCGGCTCGAAAGCCG  
CTGCAGCCAGTGGGCCCTCGCAGGACTATGCTACGTGAAGGAGCTGGGTGTGTGGGAA  
CTGTCTCAGCTTCTCCAGACCAGG**GTAAAGGAACCCGAGGGTTTATCAGAGAAAAATCT**  
**CAAGTGGGTGCTGTGGAGCAGGGAGGAGGATACAGATGGACACCATGGCTGGCCGGAGTC**  
**TGGCCTTGGATCTTGCACATTCTGTCTTGGTTCCAAGATCAGCCAGAGGAAGC** **CAAGT**  
TTCTTATCACCTCTCCACGCTAGTCTAACTACCGCGTGCCGGTTTAGCAGAATTTAATT  
TACAGTTAACAGAGAGTGGGTTTAGACTATAGGTGAGCATTCCGAGAGCTAGACAATGTC  
ACACCTTGGGTGAGACCGAATTCAGGTAGGTTTTAAAAGTCAGCGGTTCCCCACCACCT  
CCCTCTCTTTTCTCTGCTTACTCTCTCCCTGTTTAAATATGTTTTGTGTCATGCCTA  
TCTTAAGAGTTACAGAGGTGTCAGATCCCTTGAGCAGAAGTTACAGGAGTTGTGAGCTG  
CCCAACCGCATGGCTGCTGCGAAATGAGCTCCGGTCTCTTAAGCATGCAGCCATCTTTC  
TTTCTATCCCTCTGTGTTACTTTTGTAGATGCAAAGCACGTCTCTTTGTGTAGCCCT  
GGCTGTCTGGAACCTTGCTATGTATACCTTAGAGCAAGAG

**Gp1ba:**

TTCAATTTGGGGTTGAGGCAGATTCTTTTTAAAATTTTGTTTTTAACCAAAAAACAAAAA  
AAAAACAAAAACAAAAACAAAAACAAAAACAAAAACAAAAACACTATAAAAAGTTGGAC  
GTGGTGGCACACGCCTTTAATCCAGCACTCGGGAGGCAGAGGAAGGAAGATTTCTGAGT  
TCGAGGCCAGCCTGGTCTACATAGTGAGTTCAGGACAGCCAGGGCTACACAGAGAAACC  
CTGTCTCGAAAAACGAAGAAAAAAGAAAGTCTTTGAGGTAGCCAAAGTTTTTCA  
TTTTGGGGTTGAGGCAGATTCTTTTTAAAATTTTGTTTTTAACCAAAAAACAAAAAC  
AAAAACAAACAAACAAAAACAAAAACACTATAAAAAGTTGGACGTGGTGGCACACGCCTTTAAT  
CCCAGCACTCG **CGAGGCAGAGC** AAGGAAGATTTCTGAGTTCGAGGCCAGCCTGGTCTACA  
TAGTGAGTTCCAGGATAGCCAGGCTACACAGAGAAACCCATCTCAAACAAACAAACA  
ACAAAAATTTGTTTTATTTCTTGTAAATCATATGATACACTGTGCTGTCTTCCAGCCAC  
CAGAAGGTAGCATTTGGATCCTATGTGAGTGCTGTGAGCCAC **CATGTG** GTTGTCTGGAA  
TTGAACCCAAGTCTCTCTAAGAGGAGCCAGTGTCTTTAACCACTGAGCCATTTCTCCAG  
CCCCGAGGCAGAATCTTATGTAGTTTCAAGCTGGCCTCAAACACATAAGCCAACTGA  
CCTCATTTTAGCAATCTCTGCTCAACCTCCTCACAGTTGCTGTAATTACAGGTATGA  
ACCAC **CACATG** CAGTGTTTTAAAGACAAGGTATTGCTCTTTTGCCAGGCTGGAGTCAA  
CTCCATCTCAGCCTACAAATTAACCAAGCTACAGACATGTAGCTCACTGCTGCTGCTC  
AGCATTTGTTTTGTTTTGTTTTGTTTTAACCAAAAGTCTGGGATTTAAATATGTGAGCAT  
GACTCTGGCTTAGGTGATGATCCCTTCTGTTGGCTTTTATCTGAGACATGTAGCTCAC  
TGCTGGCTCTAGCCAATGTTTATTTGTTTGTTTGTTTTAACAAAAGTCTGGGATTAAG  
ATGTGCAGCATTGCATCTGGCCTAGGTGATGTATCCCTTCTGTGGCTTTTATCTGGAA  
ACAGATAGCAACACAGTAGAGAAAACATCTTCAAAGGTTACCATGATAGCTTCCACCTA  
TGCAACCTTCTGCCTCATCTCCTGATACTTAGTTGTTCCATGTAGCAAATTAATAAGTA  
GCAAGTCTATGAATTAGCTGTATCTGGCTTGTGTCTACCCAATGTGCAGTTCATCAGTAAG  
TAGGCTAAGGTATATGATAACCCCTTCTGGGAAGGTAGGATCTTAAATCATATAGATGGCC  
AGACAACCTAACAGGCTTGCAAAATCAAATAGATTTCAGAGAAATGAAGTTTGGACT  
GGAACCTTGCCAGATATGTAAGAGTTAGGAAGAAGAGAAGGAGTGAATTCAGTATGAGAG  
AGAATGATCAGGAGAGAGCAAAGCATTGAACAATGGGGCTGAGCAGGTAGGTGGGCAAGT  
TTCAGATCCAGTAGGCCTCTGAAGACCCTGTTTAGGTACTTCAGATTGCTTTTGGAGAC  
TGTGAGGAGCACTGGTGTAGTTCTAGTAGTTGAAAGACTAGCAAATCTGCAGTTCTCCTA

GTGTAATAAGGAGGAAAGTTAAAATAAAATTTAGAAACCAACCCAGGAAGGCTACTGCAGCAAA  
GAAGATAGTGCCTTGGGCTGGGAGTGGAAAGATGGAAGGATTTCAAAGAGACCAGAGTTA  
AAATCAGGAGGATTTGATAGCAGGGTGTAAAGGTGGAAGGAGTATCAGGAAGTGTTTAAA  
AGGACCAGGTAAC TGAGTAGCTGTGGACAACAGAGGAGGAGAAGCTATTTTTTTTTTTAT  
GGGGCTTCTTTTTTGTTTGGTTTTGCGGTCTCAGTATACAGCTCAGGATGGCCCCAAACTC  
ATGATCTTCCCTGCCTCTGCTTCCCATTGGACTGGTGTTTATAGACAGTCTATACTCAGG  
CAGCAGATGAAGCTATTTGTCATAATGAACCTGATTTTTTAATATACTTTGAGTTTTCGATGT  
TATTTTGTGTGTGTGTGTCATTGTCTGTCATTGTTATTATTGTTGTTTTAATGAGAAGGGTC  
TTCTTTTGTAGCTCAAGCTGGCTTCAAACCTCATGGCCTTCTGTGAGAACCCTCTCAGTGA  
TGTACTCTGTTTCTATACTTGAAGAACATGTAAGAAGAGAACTCCAAGTGGCATCTAATG  
TTAAGTATGTAGGCCTCAGGAAACAGGATCTAGACTAGAGATAAAGACTTAAGTCTAGGG  
CAGAAGTGGTGATTAATGCACAGCAAAGTATTTCCAGGCACCTATGGGGTTATGATAC  
AAAAACCCTATGAAGCCTCTGGAAGCAGGTTACTGTCTCAGAAAGCTAGAGGAAGCCACA  
GAGGAGTCTGAGAAGGACCAACACAGGCTAGAGAAAATGAGTGTCACTGTGCACATC  
CCCAGTAAGGAATAGTCTGAGTATGGAGGCTACAAAAACAGTTTTAGAGAATAACCAGT  
CTGCCCAGGGGATGCAGACTAGAATGTCAGCAGTCCCCAGATTGCGGAGGGGCTCAGCT  
TAGGGTAGGAAGGTGGCATGGAGTGTAAAGGAAGCATGCATCTCTAAGAACTGCTATGGA  
GAAGAGAGGCAGCACTCAAAGGAGCTTTTGAATGCTGGTGGCTAGTAGCTGCAAAGTCTC  
TAGATCTCTCCGGGTGGAAGGAAAGTGAGAATGTAAAACCAAAGGAGGGCTTTGGGGA  
ATGCTGTGCAGAGAGCTGATAAGAGCCTTTGCCCGCAAGGGAGACTGTTCCCTGGGTCA  
AGGAGCTGATTAATCAGGTTGTCAATTTCCCTCCCAACTCTATCTCTCTCTCTGCTCTTGGG  
TGGCTCTCTTGCAGCTAGTAGAGAAGGACCCAGTCTATAGCTTGAAGAAGCTCTGT  
CTCAAAGGACTGTCTGTCTGACTGTAAGCTGGGGCTGGGACCAGAGGTGGAGAAGGTT  
CTAAGGAGGGAATAAGAACCAAGGGCTGGAGGCAGGGGTGGAAAAGGAGAGAAAAGTCTG  
GGAGGTGTGGAAGCTGTTTCTAGATGGGATCCTAAGAACTGCAGCAGTGAAGGGCTAAAA  
GCTGGGAAAATGATGTAATGGGTGGCATCCCTTTGCCACAGTTCAATATGGCTCTCCTC  
ATCTTGCTCTTCTGCTGCCAAGTCCCTTGCATTCCAGCACACTTGTAGTATCTCCAAA  
GTGACCAGCTGTCTGGAAGTAAACTGTGAGAACAAGAAGCTGACAGCACTGCCTGCAGAC  
CTGCCAGCAGACACAGGCATCTCCACTTGGGCGAGAACCAACTGGGTACTTCTCCACA  
GCTCACTGGTGCATTTCACTCACTTACTTATCTGTACCTGGATAGATGCTGAGCTGCTGAC  
AGCCTGCAGCCAATGGTAAACTGATAAAGCTGGAAAACCTGGACTTATCCCATATAAAC  
CTGAAAAGCCTGCCCTCCCTAGGATGGGCATTGCCTGCACTCACTACTCTAGACGTCTCC  
TTCAACAAGTTGGGCTCACTGTCTCCTGGTGTCTTGGATGGCCTAAGCCAACCTCAAGAG  
CTCTACTTGCAGAACAATGATCTTAAGAGTCTGCCCCCGGGCTCTTGTGTCACACGACC  
AAGCTGAAGAACTCAATCTGGCCAACAACAATTTGCGTGAGCTGCCCTCTGGGCTCCTA  
GATGGGCTGGAGGATCTTGATAACCTCTACCTTCAAAGGAACTGGCTTCGCACAATACCA  
AAGGGCTTCTTTGGGACCCTCCTCTTGCTTTTGTTTTTTCTCCACGCCAACAGCTGGTAC  
TGTGATTGTGAAATCCTCTACTTCCGTCACTGGCTCCAG

**Gsta4:**

GACGACCAGCAGATGCCAGCTTTGGGAACAGACAAAAAGCAACATAAGCTAGCCTCTGTG  
TCACTGAGGCTGACACTCTCCTTGATAGATAAGCAACATTTCTCTGGTGCAGATGGCTCC  
TGCCCTTGAAGGGAACGGAGGACTAAAATGTTCTTGAATGATAAGAGGTCCACTCTTAGA  
TCATGAGAGAAGGGCAATTAAGTGTTCAGATAGCTGTGACAGTGTGATAAAATACACT  
CGCTCTGATAGCCCCATAAAGTTACTTCCAGGCCAGGAAGGTCCCCTCTCAGCTGCA  
TGGTTTTCCCGCTATCTGAACAAACGTTAAACAGGTTTTTTTTTCTTTTTTTTTTAAAGATTT  
ATTTATTTATTATATAAAGTACACTGTAGCTGTCTTTAGACACACCAGATCTCATTACA  
GATGGTTGTGAGCCACTCATGACCTCTGAAAGAGCAGTCAGTGTCTTAAACCACTGAGCC  
ATCTCTCCAGCCCCTGGGTTATCAGGTTTGAAGGATGTCTTCCCTTGTCACTCCCCAC  
TCATGTAACCTCAAACATTTGAGGATCCCTGCTCATATATATTCCGAGCCTCTGGACGTGG  
GCATAGCATCCCTAACCTGAGCAGGATCCAGCTCTTTATCCAGGAATAAAGGCTCTCTTT  
GTTTTCATATCGAATCTGCAGTCTTAGAGTTCCTCCGGGGTCCCGAGAACTGGGTATA  
ACAACCCCAACACCTAGAGGAAGACAGCCACCCAAGGATGTCTACCTTAGACAGTT  
CAGCCTTGGTGAGATTTGATTGTTTTGTTTTTGAAGGGGGTGTGTCTCTGTGTAGCCCTTA  
CTGTTCTGGAACCTTGCTCTGTAGACCAAGCAGGCCTCAAACCTCATAGAGATCTGCCAG  
CTGGCCCTCCAGTGTGGGATTTAAACACATGCTCCAGCACTCCCTGTCTTTGGTGAGATA  
TTTTTATTACCCATAGCAAGGAACATAGGATTTGCTTCTCTTGACACATCTTTGGATCCATA  
AGTCTTGTTCAGGTGCCACTAGTGGCTTTCTGTTCCCTGGAAAGATACAAAACAATGTCTA  
TTCAACCAAGATAGGCACTGTGACAGACAAAGGAGAAGCTATTTAGAAAGCCCATTTAT  
CTTGTAAACCCTTAGTTTACCATTGTTACTTACAGAGCTGACTGAGGGATCACTTCC  
TGGAGTATGGGAGACATTAGGGAAGCTGCGTCTCTGAGAAGTCCACCTCAGCATGGGTAA  
TGAGAGCTATATCCAGAGCTTATTGGACAGCTTGAAGTCACTGCACAAAGGCAGCCTC  
TCTTCCATAACTGTCTTACTAATTTAACTCAAAGAGTAGCTTCATGAGCCTTTCTTAAG  
TTCCCGGACTCTTTGAGCCTCATCATCTACCAAGATTTCTTTGCCACAACCAAATCAA

ACCTGCTCTCACCTTTAAAGAGTTAAGATGATGTGATCTACAATTAATTTGATTTAATCC  
AGCAAAGGCAGGCAGACCTCTGTAAGTTTGAGGCCAACCTAGTCTAGGGAGCAAATTTCCA  
GGGCTGCCGGGCTAGACCAGAGAAAGCCTGTCTTGGGGGGCCGGGGTG **GGGGTGGGG**GC  
AGAGAGCAGAAAAGGAAACTTAGTCAATATGGAAAAGAACAGGGATCCAGGCATCCAG  
GGACACACCCATCTTCCCCACCTCAAGTCCATCTTCCAGGTAAGTGAAGTGAGTTCAGAGT  
TTAACAGAGAGCCTCAGGCACGCACATCTAAGCGTCTGGTCTAGGCAGTGGT **CAAGT**  
**T**GTCTACTGCTTTTTCTGTGCTTTCAGTCTCATCTTGTAAAGCGTTCTGACTAATCTTAG  
AAACTGTGCCAAAGGAATGTTTTCCAGGAGACAAGATCCCCCTCTGACTGGATTTCTGGG  
GAGTGTCCCTTTTTCTTTGAGGTCCATTGTTTCCGTAGTCTGATAGTTCGGACTGAGAGACA  
CAAAGTGTCTCTTTTCAAATGTATTTTTGCCAGCCTGTTACAGAAAACGTAAGCCATTTTG  
CATTGGGGCAACTGGTTTGAGGGGCAGCACTTTTAAAGAGGTGATAAGGTGGATGAGGGC  
TCCGCTGTCACGAGTGAATTAATGTCACTGAGGAGCGGGTTAGGTAAGTGAAGAACTAGCT  
TGCTCAGTTTTTAGGCTTCAAAGCCGTCTACAGTAAAGACAAACTAGGTTTATTCCTGT  
TCATGACTGTACCTTGTCTTCAAAGGCAGACTGATGCCCACTGTAACCTTAACTAC  
AAACGTTTCTTGATGGGCTGCCTATGACTGTTCCAGGAATGGCGGTCTAGCCTTTTTTAAC  
CATCTGCCCATTTCTACAGGGTAAAATGAAAGGGGAAAAAATTCTTTAAGGAGAAAGAGA  
GGGAGGGGGCAAAGTTTTCCATTTCATCGGGAGTCCACCCCTAAGGTGAATGCACGAGCTT  
GCCGTTTTCTCTCTCGTCAAGGGAGGGCACACTTTTTTTTTTTCTTTTATTTTACCCCATC  
CTCAGCAAAGTGAAGAAAGCCCTCAATTTTGCTTGCCTGAGCAACTCCAGAACTGTACGTC  
TCTAATTTGTTTTCAAATAAAAGTCTTGAGTGTCTATTTTAGCATCACAAGAAATGGACC  
ACAGCAGATGCTCCCAGTCGCTGATTCTCTCTACTGTACTTTTGTGGCAATGAATAC  
AATGAATTCACAAATCTGCAAGCTTAACTTCAATAGGTTGATGTTATGATTTATTTTG  
AATACAGTGCATTTATCTGAAGTCTTATATTTACTGGGTTCCCCGTAGAGAAATGAAAC  
ACTTCCAGCACAGGAATCGGAGTCTCGCGTCAGCACCCCAAAGAGTGTACTCAGTAAT  
GAGTCAGCGAAAACTTTTAGAGCAAACCTGTTCTTCTCCCCGGGAAACAAAGCGTTAACC  
AACGTGCTTAGGGGGCGTGTACATTTCTTAAATGTTCAATGGCTGGTGGGCGGAGCTTCC  
**AAAACGACCTGCAGGACGGTGAACCTTCGCTCGCAGAACCGCTTCTTTCCAGTGCCTGGA**  
**GACAAACAATCCCAAGAATAAGGTGAGTGAAGTGCCTGATCATGTGTGTGCTGCTGCTGTG**  
**TGTGTGACTCTCTGCACTGAGTAGTATACATAATTTGTCAAAGCTACAGTTTATAAT**  
**CCGCAATTTGTTTTAACTTTGTGATTTATTGCTTCTCACTATCTCAAAGCTTGTTTTAGG**  
**CAATAAAAGGCACAAATTTTTTCTGCCTAGTAGATGAGCGGTTGGTATGGTCTAAAGGT**  
**CTTGGTAGGGTTCGTTTTCTCTGCCATTTAAGTAATTAAAAGGCAGGAGGAATTTCAACT**  
**GCAACAGATAGCAGTGAAGAAATCTCAAACCTGCAGACAGGAGCAGAGACTCAGCAGCT**  
**GAAGAAGGGGCTT**GCTGGAGGCAAGCAACCACC **CACATG**CAGCAGACACACAGAGAAAA  
GATCTGCAACACTGAAGCCACAAAATCTAAAAATCCCCGATCTCTTCTCGAGGGCTGGAT  
TTGTTTGTGTTGTTGTTGTTGTTGTTGTTGTTGTTGTTGTTGTTGTTGTTGTTGTTGTTG  
ACTTTAAAGAAAAGAAGTTTCTCTGCGCTGTGACTCTCGTGTAAACACAGCCCTAATCCAG  
ATGGCCTAGAAGGTGTTGAGTTAGTCCCTCAGCAGTGGCCTGCTGCTGGGAGTAAAAGC  
CTGCAAGGCCCTGGTTTTAAGGGGCCAGGCTTTTGTCTCAGCCTGGAGGGTATAGAAGAA  
GCCAGCCATCTTGAAGTTTCATCAGGTTTCTTACATATCCATGGCCCTCTCCCTGTCTG  
TCTAATTTCTAGTCTCTCATGATTCTGAAGAAAATAGCAAATGGACATCTATCCAATGGA  
CACGCGTGCCTGTCTGTGCACAGCTTAAGTATGACTGGGCACACCAAAAACACCCTCACA  
CATTATAACTTCAAAGTTGAAGAGACCTGAGAAAACCTGC

**Hccs :**

GCACCCACCCCTAAAAGGCC **CACATG**CAGCAACAAATGAGTCATTAACCTAATCATAGTA  
GCATCACTATTAATAATACTATTAATAAGCTACACACTGGTTATTGATCATTTCCACTTC  
ATGATAACTGTTGCTTTACGTTAGAAAAGAGGTAGAAATCAATTTATCCCAATGTAGTTACC  
TAGCTCCTTCTCCGGCTTCTTCTCCCACCGAACGTGTACACGCAGAAACAAAGGGGAAGA  
ATGGGGCTGAAGTGTCTTTGTGGTCCACAGTTGGCACTGCTAGGAATAACCAGTGATTAG  
TCAGTTAAAGCGTGTCTAGGTGATTCATAAACACCTTTTTTTTTCTGAGATGATGTTCTC  
ACTATGTAGCTTACTTGTCTTGGTACTACTACTATAAAAACTAGACACAGCTGCCCTTGAGC  
TCACAGAACTCACATA **CCTCTGCTTC**TGTAGGCTGGGATCAAATGCTTGTCTTCTTACCA  
CACAGGGCAATAAATATTTCTTATCAAGGGTCTTTTACGATGGTTCAGGAATCTAAGAAAA  
CAAGTTGTAGAAAGTTATTTTCGATTCTGGAATGCTAATTGCTTAGGAAACCCCATCATC  
TAACAAAGCTGGGGGAACTTTTCAAAGCACCATGGTCATGGCTAACAGACACATAAAACC  
AAATATTTCTTTGTTACAAGACCTTTTCTGTACAAATCTGTAGTGAACCTGAATGTATT  
TGAAATAGCTCCAAACAGAAATTTCTTCTCAATCAAGTTTTTCACTATCAGTCTCCCCC  
CATCAATCTCTATCAAATAATGTTTTAAAATCAAACATGATTTAGAGTATCTCTTAGATG  
AAGTGTACTGTTTAGTTGATCTTTAAATTTAATTTGAATACAGATTTCCAAAGAACAAGCCT  
TCGTTTCAAGCACTTTTTGTATTCCCAGCAGTATCTAAAATACCTGGTATGTTATATGTTCTC  
TGACCCGCTGTGGAACCTAGTGATATTGTTCTTTATAACCAAGGCATACCAATTTCTCTGTTCT  
TCTGCCGTGATCCTGAGAGAGAGAGACCTCCTACTGCCTCCGATCTTGGAACCTTAG  
AATCTCAGGAACAAGAAAGGTATGATTTCTTCTAATCAATTAATTAATAAAAGTGAAGACTG

TGGGAGATAAACCGGAAATGGTTATATGAGGATCTCTATGAGAGAAGGCCAGAGTGTAAGAGAA  
GCAATAATTGTGGGATAGAATGGATAAATTGTGACACAATAAAGAATTTTGAGGAAGGATA  
TAGAATTTAGAAAGGGCCAAAGGGCCGGGGAAAAGAATTAATATTTTAAAAGTGGAGAC  
AACATGAACATGTTGAACGAGAGAAGAATTGTAGAACACATAGGAAAATTTAAAAAAAT  
GTATAACACAAATTTTAAAATGTTTTAACACAAATAGATAATATATATATTATGCAATTACG  
TTGTTACCTGTGAAATCATAGACCGAGAAACATCAAAACAGAATTAACAGACTAGATTTA  
TGTATTCCCAACTTATGGCTACGCATGTAATCAGATATTTACATTATTCATAAC  
AGTAACAAAATTTATAGTTATGTAGTGGTAACAATAAATTTTATACTTGCAGGATCATCAG  
AACATGAAGATCTGTATTAAGGGTTGGAGCTTTGAGAGGTTAGAACCCTGCCCTTAGAA  
GAAGTTGTACCACTTGGACCGACAATGCTCCCCACAAGAACCAGACTAGCAAAAAACC  
AGACTATCACTGAAGAGGGGGCATAACACTTTAAGATCCAGAGTACCAGGAAGTCTGCTG  
TGGACCAACGCTCCTAGAAATGTCTTCATAAAGAAGACCTAAACAATGGTCACATTAATA  
TGAAAGGGGGCCATTTTCATGGGGTCCCACAGAACTCAAAGCAGGAACCTGAAGCCACCA  
AGGAATCAAAAGCCATGGAGGCCATGGAGGTACACCACATACTGGCTTGTCTGGTCCCAT  
GGCTCACTTTGCTTTCTTAATATAAGCTAGCCCATCGGTGGTACCGGATACAGATATGGA  
GAAAAATGTCCCATAGGCTTGGCCACTGGGCCGTCTGATGAAGACAGTGACTCCATTCAA  
GTTAACAAAAACCTAACCAATACAATAACCATCTCCTATCTGCTGGTTTACCCTACACAA  
GTAATATAAAAACGTACTTTGTGTAATATGAAATATACTACTTTAGATGAAGGCTGTGAAT  
TCCATGGAGTACACTCACAAACGGTTGCCAGAGTCTTTGAAAGGACTAGGCCGTGGAAGTT  
TAAGTGCGTCTACTTAATTATAGCACTTTATTCACAAATAAGCACAAATATCGCTTGT  
CATTAATAAATAACAAGTTGAGCGGGCGGTGGTGGCGACCGCTTTAATCCCAGCTTCAG  
GAGGCAGAGGCAGAGGCAGGCGGATTTCTGAGTTCTCGAGGCCAGCTGGTCTACACAGTGA  
GTTCCAGGACAGCCAGGGCTACACAGAGAAACCTGTCTCGAAAAACCAAAAAAGAAAA  
ATACAAGTTGACCTTTCAAGAACCTAAGGAGATGACTTAGAAAAACACAGCGACGTGCCT  
TACCCCTCGGAAGCGACACCCCGCGGTTCCTAACTTCTCACCTGAGCGCTTACCGGC  
CGGCCGGCGGAGTTAAAAAACACCGCTGGCCCGTAGGGGGCGGAGACGGAGAGAAGGCTC  
GGGCGCCTATAGGCCGCGGAGCGAGAAAGGGTGGACCGACCCGCCCTTAAACACACCGCC  
CCGCACGTAGGGCGGAGCGGAGCGGAAGGCTCGGGCGGCTCGAGGCCCTCGGAGCGGAAG  
GGGTGGGAGCGATCCGCCCCGACTGACGACCGTTCCTCTCTCAGCGCGAGCTTGCCCTC  
GTGCTCCCGAAGTCCCGCCTTCGGAACAGGAAGTAACGGCGCCCGAGAACCAGCGCTGT  
GACCGGACGTTAGCGGTGACCCCGCGTAGGAAAAACCGCGGGTGCAGCCGAGCGACTTC  
GGCTGGGCGGTTTCGACGCGCTCGCGCCGCGCGCGCGGGACAAGTTCGGAGCGGAGACTTC  
GGGCGC GGGCGGCGCCGGGTTTCGGCTGGAGCGCGCGGCTGCCGAGTGAGTTCGGCTGG  
GCAGGTTGACGCGCTCGGGGCCGCGCGCGCGGGACAGTTCGGCGAGGTGACTTGGGGACA  
GGACGGCGTCCGGTCCGGCTGGAGCCGGTGCACCTGTGCAGACCCGGTGCCTGGTGGGAC  
GCGCATAGACGGGAAGGCAACACTGGTGGCTTCTGCCCTTCGCCGCTCCTTGCCCTCCG  
TTTTGGTACTTTTTTTTTTTAACTTCTTCTATTTTCCCTGAGGCCCTGCCCTACTTGGG  
AACACGGGTTTCGAGGCTAGTTTCAAGTATTTTCCCTTGGACCCACCATCAAGACTACAC  
CCGTCTTCACGACGTGGTTGCATCTTACAAGTTTCCAGACTCTGGCACGGGTCCCCAAT  
GGTGGCATAGGCTTCAAGGTATTTTCCAATGGAGGCAGTGTTCGAAAGTGTCCCTCA  
CCACCCCCCACCCCCACCGAACCAGTGCCTTACCTTCTACTCTCCAAGGGATGGTG  
AAAAAAGCCAGGGCCAGCCAGGATCAGAATAACAAGGGGATATCAACTGTTTAGCCTCC  
ACGTTTTAATCTGATTTCTTGCTTTGGCAGCTGGGTATTTTAGATTGGGAGTGACCCCTG  
TGATTTCAGCCATGGGTGCCTCAGCATCTTCTCTGCTACTGCAGTAAACGCCTCGAATG  
CTTACAGTGTCCAGCCAGCTTACCACCTTCCAGTATGCCATGCATGATAAGGGCAAAGGA  
AAGGTAACCTTGCTGTCTCGAAAATTAATAAGAAAGCTAGTGATTCTAGAGCGGTGTTCT  
CAAACCTTCTAATGTCTGGACCCTTTGACCCAGTCTGACAGTGTGGTGGTACTCAACCAC  
AACATTATTTTCTTTCAACGTATTACTGTAAGTTTGT

**Hemgn :**

AAAATGTATGAATCCCAGGCTGGTCTCAAATTCAGTGTGTAACAGATGAGAAAACTTTTTA  
TTCTGATAGATCAGCATTATTTTAAATGTGGTTTAGAAGAAATGTAATCTGTACATACCAC  
GGCCTGTGGTTTCACTGATGATGTTTATGGCTTCTTACTCACAAACAGCGGCATAAAAAAT  
TCATCTTAAACACTTAGAGAGAAATGAGTTTATTCGAAGGCAAAATAAGTAAAAACACAGG  
AGAAATGAAGGCAGAACGTTAAACAACCTGAATATTGTGGAGCTGCTTCTCAGGCCAGGG  
CATGAGGTAGACGGACTGCCAACAAGGAGCTCAGAATGCCAGTCAAGTCAAGTCCAGCTGC  
CTCCAGCCTGGACGACACACCAGTCTCTCTCTGGGCCCTCATTTCCTTATTTATGAAAT  
GTAAGGGTGTCTTCTTAGCTCTGTGATTCAGTGTCTTAGATCAATTTAATGATATTAAG  
GTCAATGAACCTGTAGAGCAGCAGCTTGTATCGTAAGGCCACTTTCGTGGCAGGCATGTGT  
TGAAAGCTGTCTATAAAATCGCTATTCTTAATCTCATAACTGCCCTGAAATGGTGGATACT  
CCAATGCTCATAAGAGAGTTGACATTAGAGGGAAGACTTAGCCAGCATCTTGAAGAATCT  
GCTTGTGTGTCTCTAATCATTGCTGAGTCCCATGCTTTGCTCCTGTTCACTCTCCAAGAC  
CATGCTCAGCTCTTTAAAAAAAATTTCTTAAAACGGTTTATTTCTTTTTTTTTTTTTTTTT  
AAGACAGTTTCTCTGTGTAGCCCTGGCTGTCTTGAAGTCAAGTCTGTAGCCAGGCATGC

CTTGAACCTCAGAAATTCGCCTGCCTCCCAAGTGTCTGGGATTAAGAGGTGTGCGCCACCATT  
GCCCCGCAGATTTATTCATTTTATTTTTTTTGTGTGTGAGTATTCCACTTTCAAGTATGTA  
TGCTGACCTCAGGTTTGCCTGCAGAGGTGAGAAGAGGATGTTGGATCCTCTGGAACCTGGA  
GCTATGGATGGTTGTGAGCCAC **CACATG**GGTGTCTGGGAATGAAACTCAGGCCCTCTGCAA  
GGGACAAGGGCTCTTAAGTACTGAGCACTTGTCTCTCGAGCGCCACCCTCGCCTCTTTA  
CTTCAAGGCTTTGTTGGTCTTGATGAGATGGCAGCGCTGGGGCTTGAACCAGCTTTG  
**CACATG**CTAAGCATGGCCTTTACCTTTAGCCACACCCAGACCTTCCCTAGGTTTCATC  
TTCTTTCTTTTCCCTACTCCTGGCTCTTATTGGGTAACCCTGAATTGCTGGAACTCTAAT  
ATGCAGACCAGGCTGCCTTCAAATTCACAGAGCCCCACCTGCCTCTGCTCCACCAAGTGC  
TGGGCTTAAAGTTGTGCTCCCTCTTCGTTTTCTACGGTCAAGTTTCTAGCGGGGTAAAG  
TGGCCTCTGTGTATCCAGCAGCCTGTATGGTCTGAGTACAGAGTAGTCAA **CACATG**GAGC  
AGAGAAAGAGCAAGTGTGAAAGGCCACAAAAGGAGATGAGGAAGAAAATATATTGCTACC  
CTATTGGATCGAACCCAGGAGAGCCAGGTAGGTAAGAACAGTCCAAACTGCCTCTCTCT  
GCCATCTGTAGATGCTCGTCTAGCTTTTATTCATTGCGCAGACATGACATAACCGAA  
ATCTTTCGAAGAGGGCCATTTGAGGAACCTCCAGATCAGATTGGACTTGTGGGCATTCT  
TGTGGGGATGTCTTGATGGTCAATTGATATAGGAGGTCTAGCCACTGTGGGTGGGGC  
TATGTTTTTGGACATGTG **CATGTG**GTCCAGGACTGTATAAGAAAGCTACCTAAGCATGAGTCTTCAT  
GATCTAATGAAGTTTCAACCCTCCATGGTTTTCTGCTGTACTTCTTTGACTGTGTATGAGT  
TCCTTGGTTCAGAGGCAATGCCCTGTGAACCACCAAGCACGCCTGGCTTCAAGTTCCTACC  
CCAGATTCCTCAAGGATGATCTGTCAATTTATACGGTAAAATTGGCCCTTTCTCTCCTA  
AGTTGCTGTTGGTCAGAGTGTTTTTGTACAGCAATGAGTGTGAGATGTGGGAGGTGTGACA  
GGGTATGGTTCAGTCCCATGCTCCTGTGGTCTCTCTATAGACTGGGAATCTCCAGAG  
TACCAGCCTTGAAGGATGTTAT **CATGTG**TTTTTATCGTACATGAAATGCATAGGCACAGTA  
TCTAGGATATAGCAAACAAAGGCTAAAATAAATATTAGTTGTTATTATTATATCTCTGTG  
GAATAAAGTGAAGAATGCATGCCTATCAGGAAAAATATAAGATGCTATTATATCAAACAG  
AGTTCTGTTATCCTTCCGTTTTCCGGCTGATGGCTAAGGCCAGGTTTCATCATAGGCTGTAA  
CCTGCCATGTCTTCACTTTTTTCACTCCAGGGGCAGCAGTGTAGGTATCCATCTCCCCCT  
TCAGAACAGAAATACTAACATTAAGGAT **CACGGGGCA**GCCAGGTGTGGTGTATGCTGTGT  
GTGTTGCAGCAGTGGGAGGTTGAACTCAAAGGCCAACCTGTGTGTATGGAAGGCTCT  
GGGTGCCAACAAACAAAAGCGCCAGCAGAAATTTATTCAGTGTGGTGAATGAAATATA  
GCACAGCAGATGATTTTATATATGAAAAATAAAAATATGTGCTAACCAAGTGAATCATGG  
TTCTGGAAAGAGAGATTATTCTAGATAGGAAAAGGCGGTAGAATTGTGGAATCAGACAGC  
CTTGGTTTTGAGCCTTAGCTCTGTTATTTTTTTTTTAAAGTTAGGTGACCCAGAGATGCA  
ATTTAAACTCGTCGAACTGTTGTTTCTCACCAGTGAATGGAATCATATCTGTTGGCAA  
ATCTGAGATATTTCAAGTAAGGGCTGGGTACTCACCGTGAAGTACACAGAGTGACGATTGT  
CAGCATCAAAGTTTTTGTGATGCATTTGCCACCTGGAAG **GGGCAGTCAATGGTACTGGACGT**  
**GCTGGAAAGACTCACGGAGAAATAGGAAGGCCAAAGGGTCTGTTTGTATGGCATGGGAG**  
**AGAACACCTGGAAGCTGACCTTACTGTCTGGACCAAGGTTAGCCTTTCTTCACAGCATG**  
**CTGAGACTTTATAGGATTACAATCAGGGCAATGATGGGTTTAGGGCCAGCAATAGGGGAA**  
**ATGTTCCAGCTACTTGTACAGGGTAGGCTGGGAGAGTGAGCAGAAAAGAGGGAAACAGAC**  
**CTCTTTGGAGGCTCTACCCATACTTCTAACAGAGGAGTGGGAAACGCAGAGGTGGTCTGA**  
**GGAGAAACCAGAATGACAAGAGGGACATTTGGTAAGATGGAGTTCACTGGGTTGGATAAGA**  
**AGGTGGACTGCCA **GGGGTGGGG**TGGAGGGTGGCACATACCTTTAATGTTAGCACTTGTCA**  
**GCCAGCTTTCTCAGTGTGAGTCTCAGGCAAGGCAGGGCTATACATAGTGTAGACCTTAT**  
**AAAAAGAAAAGAAAAGAGAAGGAGGAGGGGAGGAGGAGGAGGAGGAGAAGGTGGAGAAA**  
**AGGATGAGGAGAGGAGGGGGGAAGAGAAAAGGAGGAGGAGGAGAAGGAAGAGGAGGAAGAGG**  
**AAGAGGAGGAGAAGGAGGAGGAGGGGAAGGAGGAGGAGGAGAAGGAGAAAAGAGGAGGGGG**  
**AGGAGGAGGAGGAGAAGGAGAAAAGAGGAGGGGGAGGAGGAGGAGAAGAGGAGGGGGAGG**  
**AGGAGAAGGAAGAGGAGGAGAAAAGGAGAGGGAGGAGGAGGAGAAGAGGAGGGGGAGAAG**  
**GAGGAGGAGGAGGAGAAGGAAGAGGAGGAGAAAAGAGGAGGAGGAGGAGAAGGA **GCAGGAAGAG****  
****G**AGGGGAGGAGGAGGAAGAGGAGGGGGAGGAGGAGAAGGAAGAGGAGGAGGGGGAAAAGT**  
**TAGGCCAGGAGGCACAGCTTGTATTTCCAGATCCTAGCTATGTAGAAGGCTGAGTCAAGA**  
**GAGTTGCTGATTCAGGGGCTGGGCACAGGGAAGAATACT**

**Loop2 :**

TGAGACATGTGGTTGGTGTCTGTGTCCGCAGATTTCTATAACCAAATGCTCATCCAACAG  
CAGATGAAAAGTGGTTTTAAAAATTGGATCTACTCTTACCGTGGATAGAGTTTCTTTTCC  
TTGTCAGTGTCCCCTAAACAACACAGTGTCCACAGCTACACACAGACATTAGGACTACTA  
TCATCAGTTGTCTAAAGATGGCTCAAAGTATCTGAGAGGCCGTGATGTGTTATGTAA  
GAGCTATTTCCATCTTATATAAAGAACTCTGGCAGATTTGGCGCCTTCTCCTGTGACTA  
GCCTTTCACTTGTCTTCTCATAAGCACTAGGTTTTCTCTACCTGGTTGAGCTTGTGAGT  
ACAGGATAAGACTGGTTGGTTGTCCCTTCAAGAATCTCCTTTGCATCCAATGTTAGGT  
CTTTGCTGGTCCCTACCTGCTTTTCTGCCTCATGCTCACACTCAAGAGAATAAGACCTTG  
ACAAATGAGCCTAGTTATTGTCAATTTCTGTACCGCTGCCATCTTGAGCTAAGTGCAAAGGC





GGCCATGATTGCTTTAAATCACTCATAATAAAAAAGACATAAAAAAACACATTTTAGGGCT  
TGATTTCTAAATGTTATACTTAAATTTAGGCGACTTAATTGCCCATAGAATGGGAATGAAG  
TCCCACAGTAGGCAGTAATTTCTTACAGCCATGGTGTGTGAAATTTGAAATCTTAAGATA  
TCATCATATCAAAGACGTACCTTCTCAAAGAAGGCTCCCTCCAAAGAGTTGTGAAAGACA  
AGAAATTGACCCAAAGTCATGAAAGTATCTCCCTCCGCCCCCTTAGCACACTCAGGTCAA  
AGCAAAAGCACAATTTGGCCATTTCAAAGTTACCTCTTAGAATCCAAGGAGATATTTATTT  
TAATAAATCACTTCCAATGCTATGGGAAATGGAGCAACAACAACAAATACACACACA  
TTTAATTACAGATCCATGGGT**CACATG**CTGGGTACATAGTTATATATATGTATATATGCA  
TACATATGCATATATATGTATATGTATATATGAATACATATGCATATATACAGATATACA  
TATATGTGTATATATGTGTGTATGTATATATATATACATATATATGTATATGTGTATATA  
TATATATATATATATATATATATATATATATATATATATATATGCTCCCATTTTCAATAGAGATCCA  
TGTAC**CACATG**ATGGGTGTATAGTTCCATCAATCCTTACACCAAACCTCTAGTTAGTAA  
ATCCCATTTATTTCCATTTTACTAAACAAGGATGCTGAAAGTGTAATTTCTGCTTGTTCAGC  
TGAGTT**CACATG**ATGGTAAAAGGGAGTTACAATACAGGCAAACTCTCAGCCATTTTCT  
TTCATGCCGTATCTTGAAGTGGTTTTCTAGT**CACATG**AGCTGATAAGACTTAAAGCAA  
CCCCAGGAAATATGGTCTAGTGGCTCGGCATTTAAACATCATTATTAAGTAGATATACT  
GCTAATCACACCCGTGTGTTTTCTATTGTTTTCTTTTTCTTCTTTTGGTTTTGGTTTTGAG  
ACACTGTCTCCTGTAGCCAGACTGGCCTGTGACGAACCTTTGTAGGGGAGGATGACTTAG  
AATCCCTAATGCTCCTGCCCTGCCTGACCTGGGATTACTGGCCTGTGTCTACCCTAACAA  
TGTTTATTTTCACTTCAGATAGAAATGAAAGTAGAATAACAAGTTATGTATTTATCATAT  
AATTTAGGCTTTGCCTAAACATTTGTAAAAAATTTGTTTTTTAATTTAGAAAAATAGGAC  
TTAAATAGAAAATATCTTTTTTATACACTGAAGTGGTTTTTGGACCAACAGGAGGCGG  
CGCACAAACACAGATTTTAATTAATTTCCCTTTTCAGTATACGTGTGAGGACAT**CGAGAGAGA**  
**CG**GAAATGACACGAATCTGTGGGTAGTGGTTCAGGCTATTGCTAGGGAGAAATCAGGGAG  
GACTTTGCTCAGTACGGGGAATCCGGGAATTCATTTCTGACTATCATCTTCCGGGGTGAG  
CTGGTCTAGGTTATTAAGCAATCTTTAAATTTGGGGCTGAAATGCCTATGTCTTTGATCC  
GGGCTGTTCTTACTAAACAATGGATTCTGAGAGCACTCGGGACTTTCTCTTTTACAAACC  
TGAAGACTGTATCATCATAGGCTAACCGGCCCTTGAACGATCAATTTCTGGACTCAGTTTC  
AAGGAACTCAAGGCCAGGGGACCTTAGGTTTTCTCTCTGAAAAGTCTAGCTAGCTGGAATC  
CATCTTTCCCTTCTGTATTTCTTTCTCTTCTAGAACCTGTCTTCAAGCTTGAAGGAGA  
AACCTGCCCTTTTCTTTGTTTTATATAAGACAAAATAATAGTAAGTAATAACTGAAAGTC  
TTTTTATCGGGAAGGAACTTCTCCGGTCCAAGCAAGTATTGCTGTGATACTTTACAGA  
GAGGGCCAGCCTCACCGCTGGAGTTCTGCTCTTTGAAAGAGGCTAGGGGAGGGAATTTCTGC  
CGCCAGCAGATGGAGAGGAGACCCGGACAACGTGGTCCCTCCAGACACCTCCCTGCCG  
GATTAGCTGCCCCAGCTCTGCTCAGGCGCACCTAGCGCGTGAGGTTCTTGGTCCACACAG  
CTTGCGCCCTCTCTGGAGAGCAGTGCAGCTACTAGCTTGC CGCAGCAGAGCCGCACT  
GTCTCGGCACTCGCAGAGCACCACTGACTGTGACTTTGGGACCTCGAACCCGAGACGAGCG  
CGCGTATGCCAGCCATTAGCAACGCTTGCATTTCTGCAGGTGCTTATTTACATTCCTTGT  
CTTTTCTTTCTGCTGGAACGGGCGAGTGGTTACTTTTTCAGCCTGAGGCCAAAAGGAAAGG  
CAGAAGAAGGGAACTCTGAAAAAGACAGTTTAGTGGCAGCGGGATTCTTGCCCCAGGAG  
AGGGGCTCAGGGGAGACTCTCGGTCTCTGCCGCGGGCCCTTTTAAAGAAGCCAAGTCAGGG  
CTGCCGCTGTGCGGTTGCTGCTGCTGCCGCTGCCGCCGCCGCCGCCGCCGCCGCCGCTA  
TTTTGGATTGCTAATCCCCAGGAGCCCGTTTAAAAAAGGAAAGGAAAGAAAAA  
GGGGGAGGGGGCGGGCAGCTGTCTTTAAATGTGATTTCTTCTATTGTATTTGAATC  
GTGATCAGGAAAAGGAAATGAAACAGAGACAGAGGGAAGCTGAGCGAAAAATAGACCTT  
CGCGAGAGAGGAGGGAGCCTGGGGAGAGCCGCGCGGTGAGCT**CCCCGCCCC**CAGGCCGC**C**  
**CCCCCTG**ACTGCCCCCGGGCGCCCCGACCCCGGCGAAGGTGCGAGGGGCTCGGGGCGACC  
GGGCGAGCCGGCTACTGCGCGCATCGGGACCGGGCGGCGGCGGCGGCGGCTGTGGTGA  
CGGCAGCGGGACCGGGATGGAAGGTTAAGTCTTGAAGCAGCGGAGCTGTGCGAGCCACC  
GAGGGAGGCCGGGCTGTCTCCCGGCCCTTGCCTTGGCCGCGCGCGCCGGGCGAGCTGGA  
TGATTGCTCTCTCTCTTTGGCGTTTGAAGGGAGCGCGGTGACTGTCTTGGAGCGTGGAG  
GGCGAGCTCGCCAGCGGAGCGACCGAGCAAGAGGAGCGCAGGAGCTCGGCGGCGCCGAG  
CACCAGGGGGTCCGAGTCCAGGCAGCTAGCCAGCCAGCGCCACAAGGAGCGCCCC  
CGCCGCCCGGCACGCGCCCCCTCCCCAATGTTCTCGGCCATCGAAAGGAAGAGCCTGG  
ACCGTCTGAGTAAGTGTGGCGCTTCTGTTCCGGCACCCCAAACAGGGTCCAGGCTAGG  
CGCGAGGGGCTGACTCCAGGTGCGCGCCCGCAGCGTGCCCTTGATCCCTCCGTCTCCAG  
GGGTTCTTTTCTCGCGGGTGAATCTGGAAACACCGAGAGGGACTGGGCGGCGGAAGCT  
GTAATGGGATCGACCTTCCGGACCGCTCCGGGCTATCTGAAAGTCTCCCAAACCTTTA  
CCAGGGCAGAAAGTTTGGCCAGGACTGGCACCCGAGCTCTGAGGCACAGGTGCAGGG  
CAGGGAGAGTGGAGGACAAGATTCTGCTTCTCCCTTTTCTGCCACCTCTCCAGGTTT  
CCTTCTTTTGTCCATTTGGCCTTGGAAAGGGGGGCATCCCAACTAGAACATCCCGGGG  
TCTCCGACGTGACTCTCTACCAGGCCCGGAGTAGAGCGGACAGTTGATGAGGTCCGCT  
TGTCCACTGGGAAGTGGTTCTGGCCTCCAGAGACTTCTA



CTGTCCCTGTCCAGGAACAGGCTCTCAGAAGAGGGTGTCCAGGCTTGGGGACAGGTCAGG  
GGCTAGCAGCCTCATGGGAGCAGGATGTGGGGGCTGCGGTCCAGGTGTGTAAGAGGAAGG  
GGAAGAAAGAGGTTAAACATAAAAATTGCTACCGGAGCTGCCAGGCTGCCAGGGAGAGTGT  
GACTCTTAGGGTTCAGCCACAGGCTCAAGGAGATAAGGCC

**Ltb4dh:**

CACAAGAGGATATTGGAATACTTGGTGCCGTCTCCACACTTTCGGGCAGGAAGGACAAAGA  
GAAAAAGAATCACGCCCGTTGAATATGTTTCTTTTTATTTTACCAGTAAACAGCCATTTT  
CTTAAAAGCTCTATCCTCATTAGGCTTCTGCATACTGTTTAGAACTGGAACCCCAACCCCA  
GCCATAAAGAGTGAGACAGTCAATTTGCCTGGGCTCCTTGCTGCACTAACAACTAGGGT  
ATGCATGCGTCCAGAAAAGAGAGAGAAGAGATCGTGATGGGCTGGCAGCCCAAGTCT  
GCCACTGGACCTAGCAAGAAGGAATAACTGGAGAGTGCTCACATCAGACTCTGTGCTCAT  
ACCATCTGCTGCCAATTTGTTTTCAGAGAAATAGAGGAAGCCATAACCGTCCCTGGCC  
CTAAATGGGAAGACATGTTGTAATCAGATGTCACCCCGTGGACCACTACAGAGAAAC  
AAAGCAACAGTCTGATGGTGTCCGTGGGAATCTTTCCTTGTCTTCTGTTAAGAAGATGAG  
ACAGAGTGTGTTGTGGTTTTCTAAACTGCTCATGTGTGACTGTGGACCTTGGGGCCAAAGG  
GTGGAGTTTTTTCATAACCACTGGCGTTTACAGCACATTACCCAGCTCAGCTGTTTCTCT  
CTCTTCTTTTTTCTCAATTTATGTGTTTGGAAAAATATCCATTTCTTACTCTTCTTACC  
ACAGGTAACCTATTCTGACACGTTCCAGTTGTGTGTATGTGTGGTGTCATGTGTGACCT  
GTGTGTGTGTATGTGTGCATGCATGGTGTGCACATGTGAGTGTGTGTATGTGTGGTGTGT  
AGTTGTTTTTTTTGTGTTTCTTTTCTTTCTTCTCATCTTCTTTTTTTCTCTTTTGTTTGT  
CCTTTTTTCAACCTTCATTTTTTCTCTGTTTCTCTGTTATTTATTTCTTTTGTGTTGCTCC  
ATTTCTCTGTCTCTGTGTCTCTGTCTATCTCTGTGTCTCTTTTTCTTTTGGACAGAGTCC  
ATGTTACACAAGAGCAGGCAGGGCTTGGGTGTTGCTCCTTTGGTAACTGTACATGCCTGA  
GGCCCCGTGAAGACATGGTCACAAGGAATTTGAGTCCCTAACTGACACCTGTATTTAAGCC  
CCTCCCTCTCCAGAGCCTTCTCAAACCGAGGCAGCAGCAGACTCTTACCTAAGTCCCTGA  
TATAGTGCACCTCATATGAAGTCATTTAATTTTTTTCTTTTAAATGATCCTTCTCCAAATA  
TATTTATAGCCTGAGCTAGGATGGGATGGAATGATGCGGGGATAAACCCTAGCACTCAAAGAC  
GAGAAATGCGCTAAAATGTGGATTTTTAGATGTGGGTATAAACCCTAGCACTCAAAGAC  
ATTTCTATCTTGTATGCCTATGGAGATAAAGGTGTTAGAATAATGGAGTCTTCTCATACAAG  
GGTGCATTATAGATTGTAGTCATGGAGCAGAACACCAGAATAAGCAACTCCAGCCTTGAG  
GAATTAGTGGTTGTATACCTCAGTTAGGGAATAATACGATAACAATAGAATAAAACAAATAA  
TAAACTATATCTGTCTATTTGGAAAGATGTCTGTGACATTAATCAGACTTCCCTCACCC  
TTCCAAAAAACCTCGAGGCTGGGGACACAGCTCAGTGGCAGAGTACAGACTGGACATCTG  
TGAGGCCTGGGGTTCAACCAAATGAACACATAAGTAAAACAAAGAAATAGAAGGACTCCAA  
TTTTGGTTAAAAACAGAAAGTCTTTCTATGTATTTCTGAAATGACAGCAGGACAAAGGAT  
GAAAACAGTCACTGAGCAGTAAAAACCGTGGATTTCAAAGAAGACGAAAAGAAGCAGGAGA  
CTAAAGAAGGGGTGATGGCGACTAAAGGTTAAAACATTTTTGCACTATGGCATGGCTTA  
GGAAGTTAGCCTGAGTCTTGGTGACCCATCAATGAACAAGTCTGTGAGATCTGGCACCCA  
TTCTCCACAGGCTGGTCTTAAGGTGAGACACAAAGATGGAAAATAAGAGGGACAGGAAG  
GGAGAGAAGCTGATCGCTCAAAAACCTGGGTAGGTTCCCTATGGGGATCAGAACTCCAA  
GATAAAAGGTCAAGGTGCGCTAAGGAGAAGGTGGTGGTGGTGGGGGGGGGGGGTCTG  
AGCCCATCACCTCAAGCAAGATGTTCAACGAATGTTTGTGACTTAAGAGTTTTTTTTGT  
TTTTTGTTTTTTTTTTTTTTTTTTAAATGAACTGGGTGCTCTCTCTCCCGTGAGCCTGAGC  
AACGGTCTCAGGAAGCCTCCCTAACGTTTCTTTACAGAAGGGCGGCTTTTAGGCAGA  
GTAAAACAGCTTGCACCCCCACCCCTTCCATAGTTAAGCTTAGGTGCAAAATTATATTCTT  
TGAGCGCTGTGACTTAGGCATTGCCCGGAGCATAGATTTCTAAATGTTCTGCTTACATC  
CTTACATCGAAAGCAAGTGTTTTCCCTCACCATTAATAAACTAGCTGTCTTTGGGACTTA  
ACCTGAACGGGATTTCTTGATCTGGGGACACCAGGCTGTGGAAGCAAGCAATGCAGACTC  
CATCTCCCACCTGCCACAACCTACATTTTATTTACCTTATTCTTTACGAAATATATTTTT  
AGATGCCATGACTGCACACCTTCTTTGTTAAGGTTTCAGAGAACTAGCACCGGCCCTCAC  
GACAGAAAGTAGTCTCAGCAGCAGCAGCTGGCTTAACTAATGCTGGCCAGAGTGGTAGGAT  
TTTTCTGAAATTAACCTGTGTAGTAGTTTCTGTTTTCTTTGCTTCTGATGCAAACTAAA  
TTGTGAACTTAAGCAAAAAAGAAAAAAATATTTAAACACACACACACACCCCTCCCAAT  
GTCCCTTCCCCTGCTGTGTGTGGGCAGAAGCTCCAAAGCTTCCAGAAGTTGCCCTCCCTG  
GAGAAGCCCCGCCCTCACCGACCGCCAGTATAAGTCAAGTCTGGGCGCTTTGCGAAGC  
ATTGAGAGCGGTCTCCCGGGAAGGAGTTTCTGTGAGCTTGTGTAAGTAGACTCTACACTA  
CTCTATTTGAGCCCTCTTTTTCTCTTCCCCTCCCAACCCCTTCTTTCTCCCAGCCG  
AGCATCTAGACCTGGTTGAGCAAGTGAACCGCAGCAGGACCCCACTCCACCCACCCG  
TACTCGCGACTCCTGGGTTCTGCACTTAGGAAGTTAGGGAGCCCGGGTCTCTCGCG  
TCCTGCACGCCCTTGAAGAGATTGAGACCCGCACCTAGGAATAGGGCAAAGTCTGGCTGCC  
TGTTCCGTTGTGGGTGCATGGAGCGGACTGCCAGCACCCAGGAAGGCTGGGCAACAGA  
GTTTGCAGGATTGCCAACTGATTCAAAGAGAAGACAAGGGTGGGCTTTGCGCATGCG  
CAGTGAAGCTACACTTGAAGTCAGGCCATGTACGGAGAGGACCCCTTGCAGGGGGAC

CTACTAGACCTGTGGCGACTTCAGAAAGGACCAGGCGCTGCCTTTTGGAAAAAGAGACGG  
AATTATGTATTCTTAAAACACAAGGGAAAACCCGCCTGTGAAATAGATGTCTCCGCGTGTG  
AAAGTGCTTATCACACAAGTCCCATGACTTGAGTTCGATCCCTGAAACCACGGGTGGAAG  
GCGGGAACCCACTCCTGAAGTCGCTTTAGGCTCTCGGTGACACGCAAGCGCCCTCACCCA  
CACACCTGCATCATGTACACACGAACTAGTAATAACAGTAAACTAGATTAACCTGAGCG  
AGCATGCCTGTTATATCTTGGCATGTAGAAGCAAGAGATGGAAGGTTCCAAGATAGCTT  
CTGCTATAGTGTAGTTC AAGGCCAGCCTTGGCTACAGACAGCGGCGCTGTAATCAGAAAA  
CAAGTTGAGCTGGGCAGTGGTGGCACATCCTTTAGTCCCAGCACTTG **GGAGGCAGAG** CA  
GGCGGATTTCTGAGTTCGAGGCCAGCTTGGTCTACAGAGT

**Mdm1 :**

TTCTTTCTCTGGAACACAGAGACTCGCTCAGAGGTACAGCCTAGGTGGTCTTTAACTC  
ACTTTTCATGATCAGCAACAATGCATCAAAACAATCTTTTTTCCCATAATTTTATTGATT  
CTTTGTGAAATTTTGCAATCATGCGACCCGATCCACCCATCTCCAGTCTTCCATATCTG  
TCTTCAACCCTTGTAACTCTCCAAAATAAAAAATAAACTTAGAAATTA AAAACAAA  
ACAATCTCTCCTAGAGGCTGGGATGTGT CATAGTATATAACCTTGGGTCCACACCTCTTT  
ACTTGCAAATGTT CAGTGTGTAATCACTGGTCTGACTTGAGGCCTCTGGTTTTCTGCTA  
TACCATCAATACTGGGCCCTCGCTGGGACTCCTCTCAGATATCCGGTTGTTGCCCCAGTC  
ATGGAGATCCTGTAGCTTTGGTTCTGCAGGACCTGCCTTTTCAAGCTCAAGCACTCTAGC  
AGCACAGAGGGTGGGTGTTAGGGTGAGCCAGCTTGATGCTCCGGATCTGGGCCTGGATGT  
TAACTGAGTTGGTCAGCCCAACCACTGGGCTAGCCAGCTCTCCTGTGCTCACACCATCA  
GGTCAACATCAAACAACATTAAGTGATATTTTTTCCCATATCATAAGATAAAATTTTTAG  
AAGAGGAATTGATGTGTCAAAGGATGGTCAAATTGCTCTTGTTTGGGGTTGTAGGAATT  
CTACTTGGAGGGGAAA CAGAGGAGCGTAGATAGAGAAGCAGGAAGCAGGTACGGTACATT  
TCCTGTCCACTGTGGGAAGCACAGCATGCAATCTATCCTAAGAGAAGTCACTTTCTGGA  
TTAGTTTCCAATGGGCTTCACTCTGAGACCTTTGGAGATAAGAAAACCAAAGCAAAGCAA  
AGCAAAGCAAACCAAACAGCTCTCTAAGATGCTTTACCATTTCTTAGTAGAGAGAATGA  
GAGGAGAGAGGGTCTCTGTGTATAGCTGCAGGCTAAAGTGTCTTTCTCTAGTGGAGAC  
TTAGTAGCCAGCTACCATGGTTGTAGCCGCGAGTAATAACATCATATAGATATATGGCT  
TTTGGAGAGAGTCTGTGATGTCTGCTGGGCATACTGTGCATGGCTGTACATGCCAGTGA  
GGCAGTTCACATTGAATCTTGAAAAATGTGTGTTGGGATTTTGGAAATCCACTCCACTCCTTG  
TGGTTTTTTTTTTGGCAAGAGTTGTTGGTAAACACAGAGACTACATAATTTATTCAGTGT  
CAAACCTTTTTTTTTTTATTCATATCTTTGATTCAATTTCCCAGGGTGG **GGGGTGGGG** GG  
AGTTGATTTTTGCTTAACCGTGACAAAGTAAACATTTCTCCCTTGAGTCCCTGCAATACA  
TCTCTAGCAAAGCTGGGTGTACCAAGTCATCTTTACCAACGGC **CACATG** CGTTTCTTGT  
CATTGATTTCCCTGCCACAGAGCTTTATCCCAATCGCCTTTGTTCTCTTTTAAAGCAGAC  
AGGCTATGTTCTTCTACCTACTTCCCTGAGACTGTGTGGTGACAAAGCTTTGTGTACAA  
TCAGAACCCTGCTGTCTATCCTGTAAAGTCTCGCTGGCTTCTCTGAGGGGTTTCAT  
TTCATGTTCCACTGTGTCTTGCTGTGTCATTTTTAATTCACAGGACTGGGGTCTGTCC  
TCACCGATTAACATTAACGAAAGGTCTCCTGGATGCATGGCAGCACAGGGTCTTATTTAA  
TATTCCTCTCTGTTTTAGATATCAGGTGGCTTCTTCAAATGAATTTTTTAAATTATCTCCAT  
GATAATGAAGAAGATCGGAGACATCAATTAGGAGCCAAGAAGAGGAGTCTGCAGGAAGCA  
CTTGAAGGGACTGGGAAGGGTTGATGGGAACATCCCAACACAGGACAAAGGTAATTCAT  
TATTCCTAGAAGAACCCTGGCAACCTTCTCAGACATATGTCTGCCTTGATCATCTTA  
TCTTCTCTTCTTGCAAGTTGTAATTTCAAGGCCAAGCTGAAAAATACCCTGAGCCCT  
TTCTAATCTCTCTACCTCAGGGACTCATCTGCTTCAAACCTTCCATTCATGCCTCTCA  
CTTGGAAAGCGAGCCAGGACATAGTATATATGATCGACTAAATAATGTATTTAGCATG  
TCTGGGTAATTTTTTTTTCTGGACTTTCAGAAATAGCAGTGTTCACGATGGGCAATAACC  
TATAAAAGTCAAATGGAATTTTATTTTTATTTATTTCTTTCAAGACCGAGTTTTTCTGTGT  
AGCCCGATACTGGAACCTCACTCTGTAGACCAGGCAGAGATCTCCCTG **GCTCTGCCCTG** CC  
AATGTTGGGACTGGTGGTGCATGCCTTTAATCCAGCAGCTATGGAGACAGAGCCAGGTAG  
ATATCTTTGAGTTCAGGCCAGCCTGGTGTACAGAGGGAATTTTATTTTAAAAAGGATG  
AGTTGGCTTTGCGGTCTTAATAAACTTTACTTGAATCATCCTAGGTCGTATGATTTTTTG  
GACCTATCCTTTTTTGACCCAAGGCTCGTGTAACGCTTCTCTCCTTAGCAACTTCTTTTCA  
GCCGGGTACTCTAGGGGCAATTTCTTTATGGACAAAGAGACTGTGGGTCTGTCTGTGCA  
TTCTGGAATGCCAGGCACACTTTACGTTCTGTGATGT CAGGGAGCTGGAACCAGTGAGG  
TAGGCTCTTGCCGAGCCCGGCCACACTACACAGACAGGCTGCGGTGCGCGCACTGCGGG  
ACTCTGCCCTGCAGCTCTGAAACAAAGCTCCCGCGGGCTCCGCCACCCGAGCTCCGGTA  
TCTCATTTGGCCAGCTCTTCGCCGCCATTAGGGAGCGGGCCGTCCCTTACGAGTGT  
GGTTGGTCTAATCGTAATGACGGTGAAGGCTGCCATTTGGTCTTTAGGCCCTAAAATGGGC  
GGAGCAAAGCCGAGAGGCGGGGCGGGAGGGCGGCGGAGTGCGCCGGCGCGTCTGTCGGG  
**GACGCCGGGTCCAGGATCTTGCTAGGGAACCAGTGTGTGCGCTGCTCC** **GCCGGCTT** GG  
GGCTTTTGCTCCCGTTAACTGTGCGCGGGCAGGCTCCGCAGCGCAGGGCGACATGCCGG  
TGCGCTTCAAGGTGAGGCCGGGGCTGGGCGGCGGGTGGCGGGGACGCCCGGGGTGGGT



CTGTGGGACCTTTAAACCCGACAGATAAACCTGCTCCAGAACACCCAGGTTGCTGGAAAGTTTCCCTCT  
ACTTCCGTCAGGACTCTATAAAAGGTGGGACAGGATGACGTCACTTCTGTCTTGTGTCC  
GGGAGCGCAAAGCTCTGAACTGGGAAAAGCCACTGTTGTAGTTGAGAGAAACCTGACC  
CGGCAGCACACGCGTGGCCATGTGGAGGCTGTTGACGCGCGTCCCCGCGCCGCTCCTGCG  
GATGCACTTTTCAGGTGAGAAACCTGTTTCATCTTTTAAAAAGGCATTTCCCCGATCTTC  
CTCCCCACATTTCAAAGTCTATGTCTACTGCGATAGGTCGCTGCGCTTCTTACTTCTTC  
CACCTCCACTATGCGGAGGCCCTGGGCTGTGGTCATGTGCGGGAGCCGGTCTCCGTGAGC  
CTAGTTGCTTCTTGGAAAGCCATTTAGTGGAACTCGTACCCCGTGTCTCTAGACACCT  
CTGTGAGGAGTGATCAGAGTGTAACAGTAATGGTTTGATTTGTCAATTGTAGATTCTTGGG  
CAGCCCTTCCCACCAGTGTCTGGTCTGAAGACGCTCCTCCCAGTTCACACTTTTGAAAGTG  
AGTACCTGTCAATTTCCACTTATTTTTCTCTGAGAAAAGGCATCGAAGGTGTGTTTGTGCT  
TCCTCCCTCCGTTGAGTGATTCAACAGATATATGTAAGGAAGGCAAACCTGCAGCGAAGTC  
CCTCGATGTTGCAAAGCAGATAACTATTTGGGCTAGTTCCCAGGCATCTACCACATGATGT  
GTGGCCCATGATCTACCCAGTCAGCACACTAACTGGGCATATATCAGATTTTTTTATCTTCT  
AAATAATAGTACAGATATGCAGACACTTAGCAATAGTAGCCAGGTGCTTCTCAGTCTCCGT  
ACATCTAACTTTTTAATGTACTAAAATCTCCAAAACCTGCAAATGGCCTAGACACTGAGG  
GTCTTCGGCACATAACTGTTAAACTACTGTGTGGGCTGGAGCAATGGCTCAGCAGTTAAT  
AACACTTGTGTCTCTTGAGAGAAACCAGGTTCAATTCTCAGAACCCACAAGATTGTTC  
TAACCATCTGGGACTCCAGCTTCAGGGTTCCCTACATCT

**Myadm-Truncated (2777bp) :**

AAAGTACTAGCCACGAACCAAACCTGATTTG  
ATCACTCACTGGAAGAGAAAATGACTCCACAAAGTTTTCTCTGACTTCAACATTTGCAC  
TCTCACACATAAAGTAAATGTGTAGTAAATGTCTGTGTGTGTTTAAACTAAAATAAAACC  
CTCCCTTTTGAAGGCATAAAAATGACAAAAGAGGGTCTGTTTCTGGGTCTCTTCCCAGACA  
GGCAAAGTGAGCACACAGCTCTTCGCTACCATCCCTACCTTGTTCCCACCCCCACTT  
CTGCAAAGCACGAAGCAAGAAGCAAGCGTCCAGGTCCCCTCTCCAGCTCCTCCCTCCTCT  
GTAGGACACGAAGCTGGCTGTAGTGAGCTCTTGGACCCCTCGAACCCCCACTCCCACC  
CCCTTCGCGAAGCTCTAGCTTCTCTCTAGGGCTAGGACTATAAACCTCTCCAGTCTCTC  
CTGGAAGGTAACCAGAAGCAGCCGCGGGAAGAGACAAGCAGCCGAGCCGCGCATAGGC  
CCCGCCAGCAGCAGCAGAGCAAGGCCGCGCCGGGACCGCTGCAGAGCGGGGTGAGTGA  
GTGCAGCCAGGAGGGAGGGAACCAGGTGTCTGGGTCTCCGCCCTGCCAGGGGGCCAGC  
ATTGGGACCTTTAGGAGAGACCTAAAGGTCCCTCCAGCATCGCGACCTCAGCTTCTTTT  
CCCATCTGGCTCAGTCGAGTTCTTTCAAGCCCTTAAATCCGACTTTTTTTTTTTTTTTTT  
TTCCCAATCCTGCATCTCTTTCTGCTTTTGCCCCCTCTCCTCCCGGTACTATAGGGCCC  
AGGAATCCTTCCCATATGATAGAACCTAGAATCCAGGACTCCGGGCCCTAGCCCTGTCTCT  
CATAAAGATTCTGAGTCTCTCCCTTTGTCTCTGAAAGCAGGAATTCAGGCCAAAATAGCG  
TGCCCTTCTAGACTCAGGCAACCAACCAACCAACCATATGTTTTGAAAACCTGAACGCT  
CAGAAAATCTGGTACCCTCCCTCCAAATTTCCAGGAATTTAGCTACTATCCATCATCCTTT  
CGCGTCTCTGGCTGTGATCTTCTGAGACTTGGCCCAAGGGTCTCAGGCCATGATTACA  
GTGTAATTGGAGATATGGCCCACTCTCTATGCAGACCCCTAAACGAAGGAATCTAGTCTT  
TGTTTTTTGGGGGTGGGCCCTCACTAGTCAAGGTAGCTTAAGCTCAAGGCCTGGCACCCCT  
AAATTCGCTTCAGGTAGACAAGACTCCGTTAAACAGAGGTTCTAGCTGACCCCTCAAACCT  
CTGGGACCTGGATGTGTAAGATTTCTTTTCTGGGTATCGTGGGGAACTGATAGACAG  
AGGCGTGGGGCGGAGAGCGGGAGAACTGAATGAGAGGTGAGACTAGGCGTGGGACCCCG  
CTTAGTGGGGGGGGGGCGACGACTCTATCTGAACAAATCATAAAACAAGTACGTTTCTAT  
GGCAACAGCATTCTCCGGTCTACCTGAAGATTTCTTTCTAGAGCTATGACAGGGAGGAT  
AGCCCCAGGAGACCCCCCTCCAGCTGCTGTGTCTTCTGTTTTGTCTCCACGGCTA  
CGGTGACCTCAGCTCTGCACCCCTCACTGGTAGGGCGGGAGATCCAGGACGCTAGCCTT  
CTGGGGCGTGGTGTGGCATTAGCCCCGCTTCGGGGCCCTACCAGGGATAGCCTGAATGA  
AGGGAAAGTCCCTTTTACCAGCCCTAGCCAGGCCAAACCCAGCCCAACCCCTCCCTC  
CGCGCTCTCAGCTGGCCAACTCCACCACTCAAGACCTTAAAGCCCTTTGGTCTGCAGCTGT  
GTCTGTGTTTGTGCTACAGTCGCCACTGCTGGAGAGGTAAGCTGCAGGGACCCCCAAA  
GGGAAGGAGTTGTGGTCCAGGATCCTTGGTCTAGAAAAGAGGAGTGGGCACGGATTTCAGG  
TGTCTGGATCCCTAGAAACACTGCAGTTGGACCAGGACTCAAGCTCTGGATGAAAGGCTG  
AACATCTGAGCTCATAAGGTCATACATGGGAAAGAAGAGGGACTGGGGAGTGGCCAGG  
GGTATGAGGAAGGACGGTGGTACTTGGACCCTTGGGCTGAGAGCGGTAGGATGGGATC  
TAGACTCCTAGTCTGACCAAAAAGGTTTGGGATCTGTATTTAAGATGGGTCTCAGGGAG  
GAGGCGAGGATTCAGACCTTAATCTGGAGGAAGTTGGGGGTCTGAATTTGTCTGAGGG  
GATGTACTGGAGTTTGAATTTGGGACGGAAGAAGGGGGGCTGGGATCTCGACTCTTGG  
TTTGAAGACTCGGAAAGATTGAGTATAGATCCCTGAATCCGAGAAGATGGAACCTTGG  
TGCTTATACCTGGTGTCTTATACCTGGAGGGACTCAGGAGGGGAAAGTCTTGTCTGACC  
CTCCAGAGGCTGCACCCGCACTAGAGTATGGGGGGGGGGCTGGGGGGAGGGAGGTAGG  
AATCTTTGAAGGCTTACGGCTGAGCCACCACCTGGTGTGAGGCGTGGCCTGGAGTCTGTT

CAGGCTGTGCCCCAGCATGTGACCTTGTGGAGTGATGGATGACCTCAGGAGTGTGGC  
ATTGGGGATGGTAGCAGGGGTGCTGGGTGTGGCCCTGAGAGTGGAACTAGACCTAGGAGG  
AAACTCTAGGGCGTTTCTCACCTGCTTATGTCTTTAGCTGAGCATTCTTGAGCAATG  
ACTTCAAACGATGCTGGAGGCCTCTATCACTAGTTCGGT

**Piga:**

ATACTTTGGAATTTCTCTGAGAGAAATTTCTCACTCCATGAGAGTATGTCTGTGAGATAT  
AGACCACACAAGCAGTGTTAATGGCATACTGAAGATGACTTTGTAAGTAGCTCAATTTCTG  
TTAGTAAGGGTTTATCTCTCGACAGGCATCAACTGCTGCAATGAAGTTTTTTCATATCCAT  
TATCAAGTGTGTGTGTGGGGGGTGTAGTATCAGGCAAGTTATCTGTTGCTGTGTGCTGTGT  
AACAAACTTTCATTGAAACTTTGTATCTTCAGTCAAAAATGACTCTCGAGATGATGATTAT  
GGTGGTGGTGGTGTATTATTATTATTATTATTATTATTATTATTATTATTATTATTATT  
TTCTGTGTGGTTGACCAGGATTTGGCTACACGGTTTATATTGTTCCACACAGCGCAGGAAGCC  
ATTCAATTAAGTAGAATCAAGTAAAGATGGAATGGCCAACATGAGTCTCATTTCTTCCA  
AGCTTTTCTCTCATGTGGCTGTTCTCATTTAACATCTGCCTTAGGCTTCTTACACAAATA  
ACCATAAGCTCTTAAAGAGGAAAGGCTACAACAGGGCATGGCCAGTGCATAAAACATTTAC  
GAAGCATTGCTGCATCTCGTTTTGCTCAGGGTATCATTAGTGAAGCAAGCCACATGTCA  
AGCCCAGACTCAATGTGGGAGGGATTAAATACAGGTTATCAGTTGATGGGTCAATTTAT  
GAAGGCCACCAATGTAAAAATTTCTCACAAAGCTAGTTCCTGTCCCTAGCCAACATGGA  
TTCTGCCAGTATTTATTATTTCCGTAGGAGCTAATCCCTGGTCCATGTTTTACTTCCACTC  
GAGATTTGCTTAGGCCATAGGTAGCTTTTTCATCTTGATTAACAATTTGCAATTTTGATTC  
TGCGTCTCTTTGGTTCTACCTCTCATTTATATATATCTGAAATTTTCGATTTGAAGC  
AGAACAAGGAAGAGTGTCAAAAAATAATGATGAAAAATGTCACTTTTGTCTGGAATCTG  
GGTCAGCATCAAGTACATTTTCTTTCAGCAATTTTCTTAAAGCATTTCGACCAGTTTGTCT  
AACTCTTACTGACAATGCCAGTATTCTGGCTAAATCTCTTCCCTACCTCTTCTTGTATA  
ATTGCACAAAAATATCTTTTGAACAGTCAGCATCTGCCTCTGTATCTTTATTCATTTTT  
TTTTCTTGAAAGGATCTTGTCTCAACTTTTATGGACACCCCTACTTCTTGTTCATAA  
ATGTTGGTAGATAGAAAATCTTTTTTCTCTGAAGCTCCCAGCCTTTTCCACATATTTCC  
CTTAGCAATTTCTTTCTCATAGACAGTTCATATGCTTTCAGTTTCAATTTGTTTGGAA  
ATAGTACTCTTGCCAAGTTTTCTTGTGTACTTTGCATATAGATAGCCAGCCAGCTTT  
CACTACATGTGGTGCCTCCCACTCTAAAATATCCAAGGAAGCTTATTTACATATG  
AATTTGCAAAGAATAAATTTCAAGGGAAGATGCTGACTACTTTATTTGACATCTTTTCT  
TTTTAGACTATTTGATAGTACAACCTGGCATTTGGCTGCCTTCATACCTTATCATCAGAATA  
TCCAGCACAGCAATATTTTAGTCAAATCTAGTGGCTTCCAAGAAGCTTCTCAAAGCAG  
TGTTTCTTAACCTTCTAATGCTGTGGTGTGATGACCCACAACCATAAAAATATTTTCTT  
TGCTACTTCATAACTGTAATTTTGTACTATTTATGATCGTCAATGTAATACCTCCTATA  
CAGGATACCTCAAAGGGTCTGACACTACTGTTGAGAGTCTTTGAAGGCATGCTTTGTG  
GTCGTTCCAGGCAGAATACTACAGTTCAAATCTGCTACAACTTTTTGTGTTTTGTTTT  
TTCCAGACAGGTTCTCTGTGTAGCCCTGGCTGCCCTGGAACCTATTCTGTAGACCAGGCT  
GGCTCGAACTCAAAAATCTGCCTGCTCTGGCTCCCAAGTGTGGGATTAAGGCGTGC  
GCCACCACACCTGGCACAACCTTTTTGTTTTGTTTTTAGAAAATACCTTAACTTTACCACA  
AGCTTCAAGTGGATGCCAGTCAAGTGGTGTGTTGTTGCTTAGAAAACAATTTATTCTA  
GAAAATGCAGGAATGGCCATGCTGGGGAATCTGCAGGTACCAACTATAAAAGAGCAGGTGA  
CTATTACAACAATCGAGAGATTTGTCTTCTTGGCCCAAGCAACTCTGGCTCCAGACCGC  
AAGACTGTTTGGCTGAGGACTGCAGACTGTTGAGCGGGAGCTTTCAGGTTATACCTAA  
GATTCCCTGACACCCCCCCCCCATAGAGTTGTAAGACAAAAACAAAATCTGAACCTTT  
TAAAAGGAAAGTCTCAGTCTTTAGGACACGCACAGATATGTAGATCTAAGATTCAAAGT  
TCAGAGTTTAGTTTTGACTTGTGTGATTTTTCTTTATTTTTGTACTTTTATGCATCACA  
TTTTAGCAATCTGCCAGAATAACAAGAATGGATGTGGTTGGTTGGCTGTGGTACCATAC  
TGACTAGAAACGCCCTGGCCTTGATTTCCCCGCCCCCTAACCTGCCCCCTTCTTATCCC  
CGCCCTCCCCGCATTTCCGCTCTCTCCCCCAGCCCCCGGCCCGGCCCGCCCTGTT  
CTCTTAACCGAAGGAGCGGGAGACCCGGCTTCTGAAAAGAGACGCAGTAACATA  
AGCAACCAGGGCACTTACGCCGGGACTTCCGCAGCTCTTAGGAGACGTGCTCCTGCGC  
TCGCTGACGCTACAATCCCGCGCTAGAGACTTGGGCCGACTGGGCGTCTCTCTTCTACG  
TAATTCAGAACCTCTGTGTGATTGGTTATCATGGGGGCGCGGCGCTCGGATCGCGGACGC  
TTCTGATTGGTGTCTTTGGAGCAGCGGGGCGGATTTCTGTTAACTGCCGCGGAGGTCCGG  
ACAGTGGCGGCCATGGGACTGGAGGGTAAGTACGCGTCTTGGCTGTCTTTCTAACGTTCT  
TCGGTCTCTCTGGATGGGGTTGTGCGGTTCTCACAGGACCGTGGCAGGCTGTGGAGGAGG  
TGAAGCCTACTCTATCTGAGGCCCGGAAGTCCGGTCCGTGGTCTCCGTAATCAAATGGG  
GATTGAGGTTGCCTTGGAGGTTGGAATCTGTTCTTAGACTGAGTTTAGTAGAGCGAGTGA  
CTGGAATCTTAGGACGTTTTTCCGAGTCCCTTTGGGTCTGGCCGGATCTTGTCTCATCCT  
GGGGTGTGGCTGGTGGACCCGGGCTGATCTCTTTGGCTCTAGTACACCCGAGCTGCCT  
CTCAGGGAGTGCCTGTGCACTGCCTTGGGACTGGATTAAAGTATACTTCTCTTGATTTCT  
CAGCCCTGTCCGAGCCCCCTTAAGGATCCTCAGAAGCTTCTACTAATAAGGGAGTTCCC

TGGGCACGATTGAGAATTTTGAGGACTTCTTGACTTTGTCACTTTTACATTTACATGGCTTGGGTAGG  
GAAGTTGTACAGATCGCTTAGCATGTAGGGCTGGAGAGAGAATTGACCAGATTTTACAGC  
CTCTATTCACCTTATAGAAGCCAAGATTCAAGTGTAGTATTTTACATACTTTCACTTTGGTTC  
ATTATTTCTGTTCTTATCATTCACTTCTTAAAACGGGATAGGACTAAAGGACCAGGTTTA  
GATGACACATGACAGTAGCACAGCATTAGCCACTTGAGGCTTTGCTTTCCCTTTTGCAA  
ACTTCATATTTTCTGCTCCATATTTGTTTACTTGTTACTGGTTGTAAATTTGGTCTTCCC  
TCTCTTTTCCAGTTTATGTCTCCGGTGCCTTACAGTGTAGCTGCTTACCCTGCCCT  
AGAACCCTCAATTCTCTGTCTCCCAAGCAGCTCCTTTCTTTCCCTGCCCTCCTCCTC  
GAATTTCTGAGACGATTTTAAATGTAGGTGAATTTGTGG

**Pik3ca:**

TACTTCCATTGAGTCAGCTGGGCACACTGTTTATAGAATCTATTCAACATAGCTTTTCTT  
CTTCTCTGGAATTCAGAGTGTAATATATATCACACATACCATTATTTCACTCTGAAC  
TTTCTCTAATGAAGGCCAGAGGAGGACACTGTGCTCATTCTTCTTACCTACTCTGGTGG  
TTTGAATGAAAATGATCCCAATGGCTCATAGGGAGTGGCACAGTTGGGAGGTGTGGCCT  
TGTTAGAGTATGTGTGGCCTTGTTGGAGGAAGTGTGTGTGTGTGTCAGTGGGGATGGTCT  
TTGAGGTTTCAAATGCTCAAGCCAGACCCCTTGTCACCTCTGTTTCTGCTGCCCTGCTGATC  
TAGATGTAGAACTCTCAGATACTCTCCAGCACCAAGTCTACTGGCATAACCACATGCTT  
CCCATCATGACAATAATGGACTAAACCTCTGAACATAAGCCAGCCTCTTTTCTTAAATA  
AGAACTTGCCATGGTTCATGGTGTCTTTTTACAACGATAAAAACCTAAGACACTACCTACCCA  
GCACCTAACAGAACCAACCCCTTGGTGAGGAACAGTATCTCTAGTTTCTATGTGTGCTGGT  
ATCATGTGCACATGAGTAGGATGTTGGGCTTTTTCATGTGTATGAGTTCTCATCTGAA  
TGTATGTCTGTGCACATGTAGTGGTGGCCGATGGAGGCCAGAGAAAAGATGAGTTG  
GAATCCCTAGAACTGGAATTAGATGTGGTTATGAGCTTCTGTGGGCTAGAAACTGAACCT  
GAGTAGGGAGGATCTCTGCCAGAGCACCGTGCCCTCTTCTTGTGCTGTCTCTCCCCTC  
CCCAGGACCTTCTCACTTGGCATCTCTGCTTGACTTCTGTGCTGCTTGACTTCTCAGTG  
TCACTGAGTGGAAAGAACCTAAAAACAGCAGGAAATTGCCTTCTGTTTTCTCGTTTTTA  
AGAGGAGCCTTGAAGGCATGTATGGGGCTGGGGACTTGAGCACTGGTACATTGT  
CCAGATGTGTCAGAGGACAGCTCTGGGAACCTGGTTCCTGTGAGACCAGAGATGAAC  
CAGGTCATCTGATTTCCATGGCAAGCATTTTACCATGAGCCATCTCAACAACCTGTAAAG  
CGTGCAATTTTAAAGGTTTTAATGGCATCTTCCAAATGAGTCCCAAGACTGCTGTCTAT  
CTAAAAATATTATAAGTATTTAATCCGAAGTGGGGTGACACAGAGAGTTAGTCGTAGGTCC  
TTCAATATTTAAAACAGTCCATCTCAAGAATATTAAGAATTGGCACAGCTTAATCACCAT  
GCTTCAAGGAAAATAATTGATGATATTTGTTATGTAACAATATACTTTAAAAACCAAT  
TGGGGGCTAAGAGTGGCACCCAGCCTTTAGTCCAGCACTTGGGAGGCACAGGCTAGCCTG  
ATCTACAGAGTAAGTTCAGGGACTCCAGGCTACCAGAAAAGAACCTGTCTGAAAAA  
GCAAAAACAAAACAAATGAGGACAGAGGTGATTTGCAATTAAGAACAACACTTGGTGCCTC  
TTGAAGAGGCCAGAGTTACGTCCTAGCATTTACATCAGGCAGTTACAGGCATCTGTA  
ACTTCAGCTATACCTGTGTGAATTTGATGCTCTTTGGCCTCTGCAGTTACATATGCA  
CATGCAAAAATAGAATACCTTTAAAAACAGAAATGGAAGCCACTTATAACCCCAACAGTCAG  
CAGGTGGAATTAGAAGCATCGGAACATCAAGCAAGGCTAGTCTTTGTTATATCGAAAATT  
CGAGGCCAGGCTGGACCGTCTTAGACCCCTTTCTCAAAACAAAACCCCAGAGTGGTCTAAAA  
GTATCACTTAGACAACAACCCAGCCCCCTAACACAGAAAGGAAGTGACAGGGACTAGA  
GAAATGGCTTTCAGTTAAGAATGCATCTGCTCTTTGGAGGAAAGAAATTTATTTCTAT  
CACGCACATCAGGCATCCCTGCTGCTTACTTCCAGCTCAGGGAGATCTGTTCCCTC  
TGTCTCTACAGGCGCCTGCATCAGCATTCACACATTCATTAAGATTTAAGATAGAGCCG  
GGCGTGGTGGCGCACGCCTTTAATCCCAGTACTCGCAGGGCAGAGCAGGCGGATTTCTG  
AGTCTAAGGGCAGGCTGGTCTACAAAGTGTGTTCCAGGACAGCCAGGGCTACACAGAGA  
AACCTGTCTCGAAAAAAACAAACAAACAAACAAAGATTTAAGATGGAAAGACTAAGCCA  
TTTTAATTTACATGACTGCATATGCTGGGTGAAGAGAAAGAAGGAGGAGTATCTGGGCTG  
TATTTACACTTAAATAAGTCAGGACCCGTTACCTAAAAGATCTGCATGTCTGTGGCCTC  
CTCAAATGATAGTAACAGTGGCAGAAACCATCTTCTGTGTGTCAGGCAAGTGTCTCATA  
CTCCATCCCATCCCTAACCTGTTGGCTGCTGCTACTTTGAGACATGCTTGTAAAGTGTCC  
AGGCAAGCCTTGAACCTGCAAAATAAATCCCCCTGCCCTCAGCCAAAGGAGCTGAGGTTGCA  
GGCTGCACCACCAAGCCTGGGGAGATGGTCATTTCTGGTTGAGTTACAGCTTGTCTTTT  
CATCTTCCCATGCTTGTTTTTGTGAGACCAGCTTAGAAAACCTATTAATATTTTTTA  
AATTTTCATTAATCTAATTAATGCAGGTTATTTTTTCTACTGTCTTCTGTAATAAAATC  
TGTGTAGCCTAGTTTAGAGCAACCATCTAGATTAACACATAAGTTATTAAGTCTGTA  
TTAGTCAGACAACAAGTTGTGACCATTTGCACCTTCTCAGTGTGCTGCTGCTGAGTGTGATC  
AGCAATGTCTTCTCTAACAGGTGGTTTTCTTCTTTTGTGAGGGCAGGCTTTGGAGAC  
AGTCGTGATTCTGACTCCATAAGGCGGTTTTCTATGTAAAGTTTGCAGAGGGTCAGAGCA  
ATGCCTCCACGACCATCTTCCGGTGAACCTGTGGGGCATCCACTTGATGCCCCACGAATC  
CTAGTGGAAATGTTTACTCCCAATGGAATGATAGTACTTTAGAATGCCTCCGTGAGGCC  
ACACTCGTCACCATCAACATGAACCTGTTTACAGAGAGGCCAGGAAATACCTTCTCCATCAG



CTTCTGCAAGACGAAACTTCTTACATTTTCGTAAGTGTCCACCCAAGGACGAGAAAGGGAA  
GAATTTTTTGTATGAAACAAGACGACTTTGTGACCTTCGGCTTTTTCAACCCTTTTTAAAA  
GTTATTGAACCAGTAGGCAACCGTGAAGAAAAGATCCTCAATCGAGAAATTGGTATGATA  
TAATTTTCAGCTAATTGACACTGTCATTGCTAAACTGCAAATAACTATGATGCCTCCTCT  
TTATTTTATTCTTAAGATACTTTGAATTATTACCTTTGTAATCTTTGAGTAGATTTCTAT  
TTAAAAATATAAAGTAGGGTTTTTGGTTTTTATGGTTTTTTACTACTGAGCTATAGAACTT  
CGTAAACGCTTTGATATCCTGTAGGGTTTTACTTAAAGGAAACAATTAGTAGGAGGACTTA  
GATTTCTATTAGCCAAGTTTTATTACTCAGAAAAAGTTGATAAAGGTCTATCATAATA  
TTAATGGATATATGGACAATGCATATAATTTAAATGCTTGAGGCCAACTCCTTTTTTCTT  
TTCTTTTTTCTTTTTGGTTTTTCAAGACAGGGTTTTCTCTGTGTAGCCTTGCTGTCTCT  
TAAAAATGGATTTATCAAAACATTTTTTTAATTCATAGAACTTTCTTTTGTGCTTTTCT  
AAATGTGTGTAGTTCTCCGTTTGTAAAAACCCTTCTGCCCTACATTGTTTATAAACATC  
CTATTTTTTTAGGTTTTGTTATTGGCATGCCAGTGTGTGAATTTGATATGGTTAAAGATC  
CAGAAGTCCAAGACTTTCGAAGGAACATTTCTGAATGTTTTG

**Prg:**

TTGGCAGTCAGGGAGTCTTTCTAAGGCAGGATCTCAGGTGGTTTTAGGATGCCCAAATTC  
TCTTCTCTTCTCTTCTCTTCTCTTCTCTTCTCTTCTCTTCTCTTCTCTTCTCTTCTCTT  
TCCTTTCCTTTCTTTTGTCTTTCTTTTTTCTTTTTTCTTCTTCTTCTTCTTCTTCTTCT  
TTCTTCTTCTTCTTCTTCTTCTTCTTCTTCTTCTTCTTCTTCTTCTTCTTCTTCTTCTT  
ACACAGGGTCTCTCTCTTTATATAGTTCCTGGCTGTCTGGAGTTTGTCTGTGTAGAT  
CAGATCAGGCTGTCTTGAACATATAGATGACTCTTGCTTCTCTGTCTCTCTGAGAGCT  
GGGGTCAAAGGTATGCACCGCTCGACAAGTGGCTAGACTCAAACCTTTGACTCTACTGC  
CTCTGTTTCCAAATGCTGGAGTTATAGGCATAAGCTATTATGCTAGGCTAAGGCCAATTT  
CATATGTGTGTGTGTGTGTGTGTGGTATGTATATATACATAAAATATGTATGTATATAT  
AATTPATCTTACGTGCATTGTAATTTTGCCTGGATGCATGTTTTGTGAGGGGGTCCAGAGC  
CTGGAGTTACAGACAGCTGTGAGCTGCTATGTGGGTGCTGGGAATTGAACTTGGGTCCCT  
TGGAAAGAGTAGCCAGTCTCTTAAACACCTGAGCCATTTCTCCACTCTCCAAGGCCAGTT  
TTTAAACACTTCTTTTCCAGATCAGTTCCCTGAAGCTCAAAGTCTGATCTCCCT  
AAGAGATTTATTTCCAATATTTTTGATGACTGTGAAATTAATCTGAGAGACGCAAGGA  
TCCAACGAGTGGCCTCCCCAGCTGCGGACTGTAAAGCCAATCTGCCTGAGAGCGTTTTGGC  
AGATACGCCCTACTCAATAATTACTAGAAGACTTCCCTTTCACACACCAGTCTGATTTTTCT  
TCTCATCGCTCATCTGTCTCTGGAGTATGGTTTTAGAGCACCTGAGTTCTAGAACAGGTCT  
GGCCACTCACCCAGAGTGTGAGAAGAGAGGACTAGAGAGAGACTCGGGAGCCAGGGTCT  
ATCTTTGGCCTACACAACAGGTTCAAAGCCAGCTGGGGATACGTGAAACCCTGCCTCAAT  
AAAAAAAATATATAAGGAAGTAAATAAAAAAAATCCCATGACTCAGCAGCAGCAAAA  
AAAAAAAAGTCCCGGAGTGAGAAAAATCTCCAGTACTACTTTTCTGAGTACTAGT  
TTTTGGTTGTTTGGGTTTTGTTTTCTGTCACTGTGATAAACTACCCTACAAAAGGCAGCTTA  
GGGAAGAAAGGGCTCAGGGTACATTTTAGCTCACGCTTCCAGGTTACGAGAACAGTGCA  
TCATTGCAAGGAAGTCAAGGCGGCTTGAACCTGAAGCAGCTGATTGCACAATCCAAGCA  
GAGAGAACAAATGATTGCTGGTTTTCTCTCAGCTTGTGCCATCCGGATCCCTAAACCA  
GGGAGGGCATCACGCTGCCTACTATGGGCTGGATCTTCCACACCAAATAACCAAGACAA  
TCCCCCTTAGGCCTGTCCATAGCCATCCTGATCCGGGCTATCTCCGTCCCTGAGACTCC  
TTCCCAAGCTATTGTAGGTTGTGTGAAGGTGACTAAATATCCATCTCTACTTCTAATTG  
CCCTGAAAGTGTCTGTGAGAAACTTCTGAAAGCTGTTAACATGATCTTTGTTTTGTTATC  
AGGGCTTTAATTGAAGCTTATCATGAAAAAGGACCAAAGGCAGAGAGAGAAAACTCCAAC  
AGATACTAAAACCTCCACACGGTGTGCGCTGGGTCTCTGTGCGCCTCGGTTGCTACAGTTG  
AGGGTTTCCAGGCTCTGAGGGGGCTTCTGAGGAGAAGTTTCTAAGGAGGGCTTCATTTTC  
TCTATCAGGGCTCCTGAGCTATGAGATTCTAAAGTCTGTCTTATCAGGAAACCCTAAGG  
AATCAGCAGGAAGCCAGAACAAGGGGAAGGAAACTCCTCCACCCATCAAAGGATGGCC  
AAGGGCAGGCATCTGAGCAGCCGAGGAACCGGACCCCTGAAGTGGAGAAATGGTTGAGCC  
CTGAGCAAAAGCAGAGAAAGCTGTCTCGTACAGATACAGCTAAGGCTAAAACCCCTTACT  
GTGAGGCTAGCACAGAGTGGCCATTTCCCGCACCGCACCCCAAGGCCCCGCAATCTTCCG  
AGGCCAGGGAACGGCTAGTCTTTATGAACGGCAGCATCTGTGTCTCTGTTTTTACATTC  
CACGGCCCTCTGAGGGGGGGAACCTGCCCTCCTTGTTCCTGATTTTTTGCCTTACTCAAGAC  
CAGAAAGAAAAATTTTTTTTTTGAAGTAAACAACAACAACAACAACAAGGAAAA  
AAGATGCAAAACATGCATGGTCTCAATCCCTGGGGAGCAGCTGATTTTATATATATATATA  
TTCTTACCTGTTTTGTGAGCTAGAGGAAAGCCAGGAATTTAGCAGACTCTGGACGTTA  
ACGGAGACCGCTCATCTGGGGGCTGAGAACCCAGCTCGGCTCGGAATGTTCCCTGTCTTG  
TGCTTACTCTGTGCGCGCCAGCTTCTTTTGTATGTGCGCTGTGGATGAGCCGAGCTCA  
GTTCTGGAACAGCTGAGTCCCTCCTGTCTGTTTAGATTGTTACCTGAAGGAAGGGAGGGG  
AAGAAAGTGTCTGATTCGACTTTTTTGTGAGGGAAAACTTTTTTTTTTAAACATGCAAATGAC  
AGATGGCAGAGCTTTTTTGGAAAAAGAAAAATAATAACCACACAGCAAACGCCTAGGGGG  
AGTCCGGTGGAGTTTTCATCATGGGTATGAACAGTTGTTGTTTTTTTTTCAACTTCTTCTTC

TTTCTGGGTGTTGATGGATCTCTTTCTATTTGTTTCAGGAAACTGTGACGCTGTGTTCTT  
GGGCAGGGTCTGAGGTTTTGGAACCTCTTTC TAAAAGGGACAGAAAGAGCACCCTGCTAC  
ATTTGCTAATCCAGAGGCTGAGTGGAGCCGAGCTGGTCAGGATGCAGGTTCCCGTCGGCA  
GCAGGCTTGTCTGGCTCTCGCTTCGTCCCTGGTTTGGGGATCTTCAGTGC AAGGTAAGA  
GACCCAGGATCTTTAATTCTCTGCTCTGAAGGCATCAGCATATGCACAAGTAATTGTCTT  
CATCTGAAGGTGCAGGGTGTCTATTGTGGGAGGGGAGGTAAGGAAGGATTT CAGGTGCC  
TCAACAACCTCGTGTGAGTTACTTGTAGTTTGGTCTAAAAATAATAATAATTAATTA  
CTCTAAGGTAAGTGGTGGCCTAAAACTGTCCAGGATGACTGAAAAGTGTCTTATTTTT  
TTGGGTAAAGATGTGTGGTTTTATTCATTTAAAGCATTCAAGAAAATAAATGGAAAAT TACC  
CAACTGATCTACTGAGATGGTGGCATCATGGAATTTTCTAGAATAGCATCCTATCACTGA  
GTTGTCTGCATGAACCTCATTGATATAAGGTCTCATGTAGCGTAAGATGGTCTTCAAC  
TTGCTATACAGCTGAAGAGGACCTGGAACCTTCTACTTCCCAGAGTGTGGGATAACAGGT  
TATGTCTCCATGCTGGGTTCCAAAGAACGGAATCTGATGGCGCTGTTATTTTAACAATGA  
AAGAGGCTTTTGTGTGTGTGATTTCTGAGACAGGGTTCTCTGTGTAGCCCTGGCTG  
TCTTGGAACTCACTCTGTAGACTCCGAAATCCACCTGCCTGTGTTTCCCAAGTGTCTGGGA  
TTAAAGGTGTGCGCCACCACTGCCCGGCTTTTTTTTTTTTTTTTTTTTAAATGGGGTAA  
ATGTAGCTATTTTTACTTTCTTCTTAAGCTCGGCTCTTACCAAACATTCAATTTTGGCTA  
GGCAAATGCTAACTCTAAAACAATATTTTAGAAACAGCCTGAGGAGTGTAGCATTTGT  
GCTCTCGTCCAGAAAACAGGTTTTCGTTTGAAAACCTGAC

Rcn2 :

CTGAAATAAAACATAATATGACCCAAAAGTGAAGTTTTTATTCTTTAATGAAGCTGAAT  
CTGAAGTGTGCTGTACTTATGCTCTGCTCTGGTATTTAAAATGCTGCTTTTATACTGGT  
ATTTATCTTTGTTCTAAAAACCTTTGAATGATAGTTTTTGGCCAAAACATAAGATTCAGT  
CTGAGGTATATCAATGGAATAGAATTGAAGACGCAGAAATGAAACACACACCTATGATC  
ACCTGATCTTTGATAAGGGGGCTAAAAATCATCCAGTGGAAAAAAGACAGCATTTTCAACA  
AATGGTGTATGGTTATCATGTAGAAGGATGCGAACTGATCCATTCTATTTTTTTTTTAAAGT  
TTTTGTTTTTTTTGTTTTGTTTTTTTTCTTGTTTTTTTTTGTTTTGTTTTGGTTGGTTTTG  
GTTTTTCGAGCACAGGGTTTCTCTGTATAGCCCTGGCTGTCTGAAACTCACTTTGTAGAC  
CAGGTGCGCTCGAACTCAGAAATCCACCTGCTGAGTGTGGGACTCGAGTGTGGGACTAAAG  
GCGTGTGCGCCACCACGCCCGGGAATTGATCCATTTCTTATCTCCTTGTACAAAAGCTCAAGT  
CTAAGTGGATCAAAGAACTCCACATAAAAACAGAGACACTGAAATTTATAGAGGAGAAAT  
TGGGAAAACACTCGAAGATATGGGCATAGGGGAAAATTCCTAAAACAGAACAGCAATGA  
CTTGTGCTGTAAGATCAAGAATCGACAAAACAGGACCTCATAAAAATTGCAAAGCTTCTGTA  
GGGCAAAAGATTTCTGTCAATAAGGCAAAAAGGCCACCAACAGATTGGGAAAAGGATTTTTA  
CCAATCTTAAATCTGATAGGGGACTAATATCCAATATATACAAAGAGCTCAAGAAGCTGA  
AATCTCAGAAATTCAAATAAGCCCATTAATAATGGGGTACAGAGCTAAAACAAAGAATCTC  
AACCGAGGAATACTGAAGGGCTGAGAAGCACTTGAAAAAATGTTCAACATCCTTAATCAT  
CAGGGAAAATGCAAATCAAAAACAACCCTGAGATTCACCTCACATCAGTCAGACTGTCTAG  
GATCAAAAATTCAGGTGATAACAGATGCTGGCGAGGATGTGGAGAAAGAGGAACACTCCT  
CCATTGCTGGTGGGATTGCAAGCTTGTACAACCACCTCTGGAAATCAATCTGGCGGTTCCCT  
CAGAAAACCTGGACATAGTACTACCGGAGGATCCAGCAATACCTCTCCTGGGCATATATCC  
AGAAGATGTTCCAACCTGGTAATAAGGA CACATGCTCCACTGTGTTTATAACAGTCCATAT  
TATAATAGCCAGAAGCTGGAAGAAACCCAGATGTCCCTCAATAGAGGAATGGATACAGAA  
AATATGTTGTACTACTACAAATGGAGTACTACTCAGCTATTAAAAAACAATTAATTTATGAA  
ATTCTTGGGCAAATGGGTGTATCTGAAGAAATATCATCCTGAGTGTAGGTAACCCAATCACA  
AAAGAAGTCACTTAATATGCACTCACTGATAAGTGGATGTTATCCAGAAAACCTAGAATA  
CCCAAGATACAACCTTCCAAAACACAAGAAAATCAAGAAGGAAGACCAACTCGTGGATACT  
TCATTTCTCCCTAGAATAAGGAATAAAAATATCCATGGAAGAAGTTGCAGAGACAAAGTTT  
GGGGCTAAGATGAAAGGATGGACCATCCAGAGACTGCCCAACCCCGGGGATCCATCCATA  
ATCAGCCACCAACCGCAGACACTATTGCAATGCCCAGAGGGATTTTGTCTGAAAGGACCTC  
GATATAGCTTAACCTCTGTGGGGCTTTGCCAGTGCCTGGCAAATAACAGAGTGGATGCCCTCA  
CAGTCACTCTATAGGATGGACCACAGGGCCCCAA TGTAGGAGCTAGAGAAAGTACCCAAG  
GAGCTGAAGGGGTCTGCAACTCTATAGTGGAAACAATATGAAGTAACCAGTACCCCC  
CAGAGCTTGTGTCTCTAGCTGCATATGTAGCAGAAGATGGCCTAGTTGGCCATCATTTGG  
AAGAGAGGCCCTTGGTCTAGCAAACCTTATATAGCCCAGTACAGGGGAAAGTCAGGGCC  
AAGAAGTGGGAGTGTAGTGGGTAGGGTAGCGGCGGGGGGAGGAGGGTATAGGGGACTTTTG  
GGATAGCATTTGAAATGTAATGAAGAAAATATCTAATAAAAAAAATTCAGTCTGGCC  
AAGAAATTTTTGTAATCATACCCACACAGCTTTTCAGTTTGGAAACAGGATTCCTGCTCTCA  
ATCCAATAGTTTATGAGATGTGAAAGACCACTCCTCCCTCAAAAAAAAAAAAAAAAAAAGT  
CCTTTTCTATTTTTCTATACAACTATFCTTTCCACACCCCATGGATGAAAATTACATTA  
TTTAATTCGTGTTTTTACAACATATTTAAATGTCTCCTTTAAAAAAAAAACAGAAAAGAAAA  
AATGTTGCCATTTTTATAAAAGCTCAAAGAGGTTAAGGGCCCAATACTTTAACCAGGTCA  
TATGAATTGAACATCAGATGCAAACATTTGGCTGCAATTCCTGATACTGTATTTCTGCT

PTGGAGAAATTAACATAAGGCACACTGAAGCTGGAATGGATACTGCTGGTCTGTTCTG  
ATTTCTTTGAGATATAATACTGTGCTGTTTTGCACCAAATCTCCAGGCTCTCTCTCCCA  
CTGATGGAAGCCAGGACAGACTCACAGAATGGCCAAAGAACTTCCCGCCATGAATGAGAC  
TGAAAAGAAAAGGCAAAGTGTCTGTGGAATTGGGGCTATCTTCTCAAGGGTACGGCGGCAA  
AGGTGAAGGGGCCCAGGGGTCCCCTGGCCCCAGCAGCTGGCTCGCCTGCAGATTCTAG  
TAGGAGGCAATAGCAAGTCCCCCCCCAGGGTAGCACGACCAATCAGCAACAGGTATA  
GCGCTCTGGACCCGCTCCGCCCCCGGCCATATAAGGCAGGGCTTGGCGGGCTCAGC  
AACGCAGTAGTTCGACAGACTTCAGGCTGGGGTGTGGAGCCCCGGCCACCGCCGCCACTGA  
CGACCCCCGCCCTCACATCAGCGCCGCCCTCTGTGGCTGCCCGTGAAGCAAGGCTGC  
CAAGCCCCGGCTCCGCCTGCCTCCCTCTCGGGCTTTCTGCGTCTCGCCGAGCGGGCG  
CGATGCGGCTGGGCCAAGGCCCGCGGCGTAGGACTGCTGCTGCCGCTGCTGCTGTACG  
CCGCGGTGGCTGGCGCCAGCAAGGCGGAGGAATGCACTACCCCGAGGGCGAGCACCGGG  
CGGACTACGACCGGAAGCGCTGCTGGTGTCCAGGTGAGGATACCAGGCTGGGTACCCG  
ATCGCCATGGGCTTTGTCTGTGACAAAGCGGGACGACAGAGAGAGGCCTTAGCAAG  
AGCGCCTGACAAATGGGGTCCGGGCGGGCTCAGCTTTCGCTCTAGGAGACCTGAGGCC  
TGTAAGCTGGTGGTACTGTTGCAGTTCAGAAACAAGATTCTTTCTATTCCTGGATCCAG  
GGACAGGATTACTTAGAGTGGTAGTGGGGCGTATTGAAGAGAAGTGTGGGTATCCTGA  
AACCCTGGGGCAAATGAGGCATGTGTAGCTCTGTTTCTTCCACCATCACGCCCACT  
GATTGTAATGCTTGATTCTCCTGTGTGTGGTTTCCCTCCCAAAGGAGACGTCGATGAG  
TATGTTAAACTTGGCCACGAGAGCAGCAAAAGCAGATTGCAGTCGATCATAAAGAAAAT  
GACTCGGACTCTGATGGCTTCTTACTGAAAGTAAGGACTGACTGCACCACCAACAAT  
GGGAGAAAGCCTTTGTAGGAAATTAATGTACATTTAAAAAATAAACTGTTGTCTATT  
GAATTCTAGTAGATTGCTGGTGTCTAAACAAGCTAAAAGTAACTGTGATATGGAAAATAG  
TTCTTATGCCTGGAAGGTGGGCTACAAGTAAAATCAGTGC

**Spag7 :**

GAGGGCTGTGTCCCTCAGAGGAAATCAGGAAGAAAGAAGGAAATGAGGAACTCTGGTCCAG  
AACTAGTGGTCCAGAAAAGCAGTTTCTGGGGCCTTTGCCTACTGGTGTCTAGAAAAGAAGGA  
GATAAGAGAGCAGGGCTTAAGGTTACAGCTTAAGCTGTGCTGGAACATTTGATAGTGAGGG  
CTCCACAGAGTTACACATCTCCCTCATCTAGGTGGACATGATCTCACTGGCCAAAGCAG  
ATCATCGACGCCACACAGCAGCGGATTAACCGAGAGGACTTCTCAGAGTTCCCTGACGCT  
GGAGCCTCACCCAGGGAGCACACAGGCCACCGTGGGGCTCAGTGAGACCATGTCTTGGCTG  
GCCAGTTACCTGGAGAATGTGGATCATTTCCCAGCTCAGCTCCTCCAGGTGACCAGCT  
CACCATAAAGCCTCCAGTTCTTCTGCAGGGAAAGATGGGAGGGAGGAAGTAGGCTTCTCT  
CATAGCCAAAGCACCGTTCTGGCTGAGGCCCTGGAGTGGTGAGAAGGGACCTGGGCAGGC  
TGGTGAACCTCTAGAGCCACTCTTTACAGACTCTGGCTGAGGATCGTCCCTAATAGCCACC  
TTGTGCTAGGATAGGAGGATTTAAACCCTTTGTGATATCCTTCTTATCCCCACAG  
TGAGTGCCTTTTGAACGAGGTTCGCTCGTATCCCCCTCCTTCTCTGGCCAGAGTT  
CCTCTCTGCATCTACCAGTGGCAAGATGGAAGTGATTTTGCCTGCTGACTCTCTCAGA  
TCACGAGCAGCGGGAGCTGTATGAGGCAGCACGAGTCATCCAGACAGCTTTCGAAAGTA  
CAAGGTTAGACCTAGGTTCTTGGGATGAATTGTCTTTGACAGGGAAGACTATGGGCTCCC  
ATTGCTTTTGTGGAACAAGCACTCACTCAGAGGCCTTAAATAGGAATGAGAAAGAATGGC  
GGGCGGGCGACACAGTACTTGCCACCAAGCCTGACAACCTAATTTCTGATCCCTGGAATTC  
ATGGTGGAAAGAAGAACTGACTGCTTCAAATTTGTCTTCTCGTGTCCACACACAGGCAGCC  
TATATACACACACAAAATAAGTAAATGGTTTTAAAAAGTTTAAAGGAGGACTCTG  
CAGCAAGAGCTGGTCCAGAGTCTACTAGGTGGGCTTGAGAGCTCAGACGGGGCCTCA  
TTCTCTTCTTTAGGGTCCGAGGCTGAAGGAGCAGCAGGAGGTAGCCGCAGCGGTGATCC  
AACGTTGTTATCGGAAGTACAAGCAGGTTAGAGCATTCTTCTCAAAGTATACCAACACGC  
GTCCACCTAACCTATCTATCTCTGTGCTATGAGAGCCCTAACGTCCCCTCTCTTTCCACA  
AGCTGACCTGGATTGCATTAAGGTATTAGGCATGAGATCTGGGTGTGAGTAGTCTGATT  
CAGCCGTGGGTGGGTGAGAGAACGGGCTCTACATCAGCCTAATTTGAAGGGTGACCTTCAG  
AGGTTGGATTTCTGTCTCCATTTTCACTCTGTCCCCCTCTCTTCCCCTGCAGTTT  
GCACTTATAAGAAAATGACTCAGGCGCCATCTGATTGAGAGCAAGTTCCGAAGCTAC  
TATGAACAGAAAGCGTTTTGAGCAGAGCCGCGGAGCAGCGGTGCTTATCCAGCAGCACTAC  
CGCTCCTACCGCCGAGGCCGGGGCCTCCTCACCGGCCCTCAGGCCCTTCTGCTCGA  
AACAAGTAGGGACCACCCCTTCTGCCCCATATACAGCCCTCAGTTTACCTCTTTGTTAAT  
GCCCACTACCTCTATCGGCCCTCCAGCCTTTCCCTACAATGGTCTTAAAGTGGGGACTCT  
TCTTTCCACCAGGGGCACCTTTCTCACCAAGAAGCAAGACCAGGCAGCCGGAAAATAA  
TGAGGTTCTGCGGCGTCCGCACAGGTTCTAACCCCATCTTACCTCTCTGCCCCGTA  
CAGCTTTCTGATCCACTAGTCTCCTCTGACTTGGCTGCTCTCTCCGCAAGATTGAGGGA  
ACTGAAGCAGAACCCAGGAGCTGGAGGGGCTGCCCCAGCCAGGACTGGCCACCTGACCTCT  
CCAACGCCTTTCTTCAAACCCCTGGGAGCCCTTCTGGCTGTCTAAACAAGGAGAGGGCT  
TTCGGGACTAGGGGAGCCCCCTGTGCGCAGCTCTTACCCCTTACCTTTTTTGGGAGCCC  
TTCGTAGAACCCTCCCGCCCCAGGCCTTACACGTTTCTCCCTCTGGTTGTGCCTCCTCT

TTTGGTCTCCGGCTCCAGAAGACCACGCCCCACATATCTGCATCTTCAGCTGTGACCT  
CGGAGCCCTGCCTGCACCTTCTCCATATCCCCGTTCTCTGCCTGCACCTGACTCGGACCTT  
CCTGACTTGCCTTATTTATTTGTTTCGAGAGTCTCTGATGAATGTATCCGCTCGGTCCCC  
ACCGCTGCCTTCGCTGCGCGCCCTCGTGTTCAGGGGTGACTGCCCCACCTTGACTC  
CGCATGTTTGCCTGTGTTCCCTTTCTTGCCCTGTCTTCCCCATCACCTTGACTCTC  
TGGTCGCCCCAGTAGGGCCCAAAGAGGAGGGGGTACATAGGATCGCGAGGCGGAGTCC  
CGCTCCCGTGGGGAGGGGTGTGTACATAACTGTAAACATACAGAGTATAGTGAAGAATCTA  
TTTAAAGCGCTGCGCGGCCGGCGTCTGATTCCCTGGCGCGGGGAGCCCCGGCTGGC  
TCCACGAGCACTTTCTACTTGTGCATGGGCTTGGTTTATACGAATTGCCATTAAACGTCT  
CTGCACCAGCTAGCCTCCGGCCTCTCTCTGCTGGGGCGGGGTAGGAAGGTGCCACGCA  
AGTCGCCGGCCTCATCTCGCTGCCTTAAAGCGGGCGGAGCAGCGGGTTTTTCGCTTCCG  
ACGTGTTTTCCGGCCTTAAAGGCATTTTCGTCTTCCCTTTAAGACGCACCGCCCCCTCTCA  
**CTCATTCACAAG**ATGGCGGACCTACTGGGCTCCATCTGAGTCCATGGAGAAACCACC  
AGCTCTCGTGCACAGGAGAGTCGGCGCAAGGCCGAG**GTGAGGATCCAGATTCACAACC**  
CGGTATCTTCGCCGATTCTTGGGACCACACTTCCCTCTTTGAATAATGCCACCTCCCT  
ACCCTAACAGACCCCCACAGGCCACTTCTGAGACCCCTCAGAGTCCCTAAAAGCCTGTC  
GGCCCGCCCGCTGTCTTTTGCAAACAATGATTGGCTACCTCAGCCTGCCTTCTACCTCCA  
GTCTCTTCTTCCATCCTCGCCTTTTACAGTCTTGTGTTGCGATTGGTCAACGGCCCTGC  
CTGTCTGCTGTTGGTGAGCTCTGATTAGTAGGATGCCTTTCTTCCGATTGGAGGATGTCG  
TATCCATCGCCTCGGTCCCAGCAATCTCCAGTCTATTACGATTGAGTTTAGGGCACGCC  
CATCCACCCGCTGTGTTCCCTCTATTGGCTAGCTCAGCCAAAAGCTACCTTTAAAGTG  
TTACCTTTTCTGACCCAGCCTCAGCTCAGCTCCCTCCATTGGTTGGCTGGATCCTCCTAT  
CTTTATGCCCTTCTTGGAGTTGACCCAGTCCCTCATACCTTCCACCGCCCTTCTCTAACT  
ATAGCCTTAAATTCCTGTGCTGCCAACTAGATCGTGATGTTGATTGGAGAGATGAGAAT  
GCCCGCAGGCTCCGATTGCCATCTCTCTTCCAGCCCCCGCGCTGAGTAGCTAACCA  
GAAAGCTCGCTGGGGTTTTGGCAGCCAGGGTAGGGTGC GGCCCGAAGTGGCCTGCCCTGTA  
TTGGCTTGGAGCG**CATGTG**AAGGACTTTATAGAAAGGATAGCCTTAGGTGCATCCAGCTC  
CCAAC**CGCT**AGCCTTGGTGTGGATAAGTCTCTTACCCGCACCTACTACCCATCTGCT  
CAAAGGAGGCAAGACAGGATGCTTTCAGAATGTTCAAAGA

**Stab1:**

GCTAGTGACGCCATAGCAGCCCTGGCCTCCTGCCATGCCCAGCCTAGCCTGGTGGCCGT  
GAAGGCAGGGAAGCGGCCTTCTGCGTCTTTTTTAAGGTCTTCTCCTCTCCCTTGGTTCC  
TACATTGATTGCCCGT**GGCCCCCAGACATGTG**ACCAGCTCCACAGAGACTGTGAA**CATG**  
**TG**TGATCAGTTAATCCTAACGCTGGGAAGACATATGCCAGCCCCACCAGAGCGTCTTGT  
GCTGTTAGCGTCCCTTGTGTGCTGCCTGCCCTGAAGTGGCATGGTCCAGACGCCCCAGCAT  
GTTTTGTCTGTGATTGATGCTGTTGTTAGCTGGCGCTGTGGACCTGATAACCCCCAGCT  
CTTTTCTGAAGTGTAAAGTCCAGTCCCTCTGTTGCTGTTTGTGCTCATTGTGGCGTGC  
GCTGCTAATTACAAAGCTGGTAGCAGAGTACACAGGCAAGCTCCACGTTGTGGGCTTTT  
CCAAAATGGAGGCCTCCTCAAGTCCAGAGCAGAGGAGGCCCTATGGGGAGTCCCAGGTC  
ATGGGTCCAAGAGGAGCCAGTACAGGGGACCTAGAGCTGCCAGCACCAAGTATAATTCCT  
GTTGCCACGTTCTCTATTCTAATAAAAATGGAGTTTGACACAACATGAGTCTTCAAGGTT  
ATAGAGAACTGGGGTCCCAAAGGGCTTCAACCAAAGGAATGGTCCAGCAGGGGGAGATTG  
GAGACAAGAAGAGAGAGAAGGAGGGGAAGGTGGGAGGGTCCCCAGAGCAGAGCAATGCTG  
AGCTGTGGTCAAACCTGGGGCTAGGTAAACAAATAGAAACCATCTTCCAGTGAAGTGGT  
GGCGTACACCTTAGTTCAGCACTCAGGAGGCAGACTCAGGTGGATCTCTGGGTTCAAGG  
CCAGCCTGAGTTCCTTCCAGGACAGCCAAGGCTATATCTGTCTCAAAAACAAAACCAAAGA  
ACAACTTCATTTTATCCCTTCTTGTCTGTTCCACACCGGTGTGAGTCCAGATGGTACTC  
CTGTCTTTCTCAGCTAACAGTACTCCAGGAGAGACAAAATGAACTATTAAAGAGCAGT  
GCCAGCTGATTGCCAGTCCAGAGGGGCTGAAATCAGGCCCTGGGCTGCCCCAAAGCCTG  
GTGTGAGTCAAAAAGTGTCTGAACCGTGATTAATGGAAAAAAAACCCAGGCCGAGT  
TTACTGTAAACAAAGAAATCTACTTCTTAATCAGGCAGCCTTGGAGCAGCAGCCAGAA  
AGACTAGCCGAGCAACATTTAGAGGAGACGAAAGGACTTAGTTGGCCAGTTGACGACA  
AAGCCTGTGGCGCGTAACTGAAGCCATGCTGCAGGCCAGACCCATGCGTCTGCTTTGTG  
AGGCACAGCAAGAGATTTTAGTCCAAACCAATTAGCTTACCATCAGAGACCACACCTAC  
CTGGGAGAAGGGAAGAGCACACAGACATATACCATATACCTTACCGTATACCTTTACCA  
TATATATACACCCATAGCATATACCTTGCAGTTAATTTACTGGAATAGAAAAGCCCCAG  
TTGGCCAAGAAGCAAAGTGAAGGCTGGGCATGGTGGCATACGCCTTTAATCCCAGCACT  
TA**CGAGCCAGAG**CAGGCGAATTTCTGAGTTCAAGCCAGCCTGGTCTACACAGAGAAAC  
CCGTCTCGAAAAAACA AAAAAGAAAGCAAAGTAGAAAGGGAAAAATGTACGGA**CGCT** GGA  
AGGAAGAGTCCAGCAAAGGGGACAGGCCCTCCCTAAAGCTGTAGCCTGACTGAGAGTT  
TCTTCCCCAATAGGGCAGCCTTGTCCAGCCTCGGTGGGAAAAGATGCACCTTATCTTGCA  
GAGACTTGATGTCCAGGAGGGCCCCATGCTCTCAGAGGAAAAGGGGAAGTGGGACGGGG  
AGGATTCGTGAGGGGGACAGGCAGCATTTGAGATGTAATAAATAGATATGGGCGGT



GAGTTTGGATTCCACACACAGTGCACCCAAAGGAGTCTGTAGAGTCCAGGCTCAGGAAATCC  
CACACCCTCTTCTCACCTCCTCAGGCAATGCATTTATACGATGCTCATATGAACATGCAG  
GCAGACACTAATAACAAGACAAAGAGAAAATAAAAATGAAAAAAGTCTTCCAATGTACAA  
AGTTATAAAGATCTTCCCTTGTTTTTCTCTAGACGTTTATAGGATCATAGTATAACAGC  
TGCCCTCAGACCTGAAACTCCATCACAGGGATAAAGCAGCAGGAGGAATAGAAATCAA  
CCATCCCCCTCCTCCCGGTGAATTTCCAGAGGCCCGCTCTACAAGCCACTCTGTCTCAA  
AAAAAAAACAAAAACAACAAATAAAAAAACGCACAAAAGCCCCGAAGAGCCGGCGGTG  
GTGGTGACGCTTTAATCCCAGCACTCAAGAGCCAGCCAGGATTTCTGAGTTCG  
AGGCCAGCCTGGTCTACAGAGTTCAGGAGAGCCAGGGCTATACAGAGAAACCTGTCTC  
GAAAAAACA AAAACAAACAAACAAACAAAAAAGCCCCAACAGCCCAAAGGGCCAA  
CTATGTTGGGGTTGGGAGGGGGTAGAGTATATTTATTGACCACCTACTGTTTGTGAGGC  
TTTGGATATAAAAACAAACCTGACCAGCAGGAGACACACAGCAGAGGAGACAAACGGAAGA  
ATAAGTACATAAATAATTTATGGATTAAAGGAAAGGGATCGGGAGCTGTGGTGAAGGGGA  
AGGAGTCTCAGGTCTGTTTTTTTTCCAGCTTTTGCCTCCCTTACAGCGCTTCCAGGTC  
AGGGGGCGCGTGCATGACATCATCGGTGGAGCTCGGCGGCTAGGTGGTCTGGGGGCCG  
AGAAGGCTGTGCAGATCTCTTAGAGAGGGTCACTTACTGCAGCCAGCGACCTACGGACGG  
TTCAATGAGCCACTGTACGATCAAACCGAGCCCCTTCCCTTTATTGAAAGCAGAGAGCGA  
AAGGAAAAGAGGCAAATGAATAAATAAATAAATAACAAAAAGAGTTTCTGAAGAAC  
TACATCTCAGAGGGCTTCCGAAAGCGGGATGCGGCTGCACCTCTGTCCACACCCTGAT  
CACGCGCTATTTTGCAAAGGTACCCCGCTGGCTGGGAGCGCGCCCCACCCGGGACC  
CCAAGAAGCAACCCGCTTTCTGAGCGCGAGCTTGGGGAGCTGCACCTGCGCTGCACGGAC  
GCCCCCTGGCGGGAGCCCCGGCAAGCACTAGCCGAGCGCAGGGGAGGGGGCGGGGGCGCC  
GCGCACGCGCACGGGTCGGCGGCGCGCGCGAGCGGGGGCGCGCGCGGTGCAGCCACG  
ATGGAAGGGGGTGCCTACGGAGCGGGCAAAGCCGGGGCGCCTTCGACCCCTACACCCTG  
GTGAGGCAGCCACACACCATCTCGCGCTCGTGTCTTGGGTAAGGACACAGCAAGCGGG  
CTGGGGCGGGGGCGCGGACCCGACCGACTCACTGCGCCGGCGGCCCCCTGCTGAC  
ACAAGCGGATCACGGCCCCGTACCCAGGATCCTCAGTCCCATCGCCGAGACCTCCAGGC  
TGTCTGCTGCTTTACACTTAGCGGCTAGGTTCTCGTGCCTCGGTGGGGCAGGAGCCCAAGT  
TTAAGGCCGCTTATTTGGGGGGCGGGATCAGGGCGTGGATCTTTTTCTAGGGCGCACTGC  
TGCACCTGCCGCGCGCTTTCGGGGCGAGGACCTGGAACCTAGATTTTGTGTGCTCACTCTGT  
ACGCTGCGGAGCTCTGAGTCTGGAGCCTGGATTTTTGGGTTCCGTCAAGACCCGCATCTG  
TTTTGCCGCGTGACCTTGGCGAGGAAACCCACCCAAAAAAGATAACGAGGGATTCAAGTTCG  
GATCTGGGTCGGGAGCCTACCTCTTATGTCACTGCTCAGTTCTCGATTTATAGGGGTG  
GAGGAGCCAGGCCCCCTTGGGCTCTGACATTTTATGAATCCGCAACTCCCGATCCCTA  
ACAAACACCTGAGTGGATTCTAAATGTGGTCTGGAGAAAGGTTCTTCCATGCAATAGAG  
AGCAGAGAAGTCTGTTTGTTCGCAATCTTTAGCCCACTAGTCCGTGCAGGTCCCCAGT  
GCTGAGTGGGGCTCAGCTCAAACCTGGGGGTGGGGCAGAAACATCTTGAAGGAGTGGCT  
CAGGAGGCCTTGCACCCAGGGTGGAGGGCCTGTAGGCTCTGGGGTTGGCTGGCTTCA  
GGAGGGTCTTGCCCTGTAGATCTGGGGTCCATTCTGT

**Tgtp:**

TTCAATTTGATGCTGAAAAAGCATTGACAAAATTCAACATCCCTTCACGGAAAGATCAGA  
AATTCAAGGCCCATACCTAAATATAGTGAAAGCAATATACACCAAACAGTAGGCAACAT  
CAAATAAATGGAGAGAACTTGAACAATTCACCTAAAACAGAGACTATCTATTTCCCT  
AACTATTAATAATAGTACTTGGAAATCTAGCTAGAGCAACTAGACAAAAAAAAAAAAAGAG  
AGAGAGAGAGAGAGAGATAGAGAAAGAGAGAGAAATAGGTCAAAGGATACAAATTGGAA  
AGGAAGAACTCAAATATCAGGATTTGCAATGATGATAGGATACTAAGGTAACCCCA  
AAATCTACACCTGAGAACTCCTGCAGCTGATTAACAACCTGCCCCGGCTATTTCTACAAGA  
ATGGGAGGCAAGATTAACAGGCTATCTGAGAAGCTTTGCTTACTGGTGAACCTCCCTGCT  
AGCTTGCTAGCTAGCTTGCTTGCTTGCTTGCTTGGTTGCTTGTGCTTGTGCTTGGTTGCT  
TGCTTGCTTGCACTTGGTTGGCTAAGTCACTGCTGGAGGTCTGGTTCAGAATCAAGC  
CTCACCCAAAACCCAGACAAGAATGATTAATTTACCCAAAATATTAACCTTTTTGGGCTTT  
CCCTGTATAACTCTTTAGCTGACTATAGCTGGGGCTTAGCTAGAAAACCTCTCTGGTTTTT  
GCTAAGCCAGTCTCTTTTTTAATAAAAAAGGCTCAATTTGCTTAAAGCAAAACTTAAGTC  
GTGCTGCAAAAATCTCTAAACCCAAGACCCACACTAGGACAGTCTTCCCAGAGGTAAGAGC  
CATCACATGAGTTAGCATCTCCCAGAGGAATCCAGAGGGGCAGAACAGCTTGGCACGTT  
TGTGACCTTATCTAACCTGTGAATGTGGGAGTTGCCCTTGATTCCTACAAACTAGCCAT  
TTCTTGAACTGAAACTGAACTTTACTCTGACTCCTCCTTGTGTGGTTTATATAAATAGG  
GCTTAGATCCTGGCAGAAAGTGTAGAGACAAGGGCTGTGTGTGGTTTCACTACCTGCTC  
TAGCCAGCTGCAAGCCAAAGTACTACCATGAACCTGTGTCTAAAGGGTCAACCCCTCAG  
ATACAATAAGGCCTTCTGTTGAACCTTAAACAACCTGACCCATCTAAGGAGGCTTATC  
TAAAGGAGAAATATATGAGTGGGCTTCTTCTAGGCTCTGCCCAAGTTACCTGGTAAT  
AGCCATGTATCTCTACTATAAAAGGGTGTGTTTTGCGCGCGCGCGCGCACGCGCAC  
GCGCGCACACACACACACACACACACACACACACACACACACACACACACACACCTCTTA

CTCTGTCTCGCGGATTCAGTTTATTTCATGGTGGGAGGGGGACTGCAAACTGGAAGGAG  
ATGGGAGGAAGGAAAGAAAGAAGGAGACCAAGCAAATTTGTCAATGTCTCCGTTTATTA  
TGCTGAGGTGCCTTGTTTTAAAGCATACATCACGGGGAATAGGGAGGGTGCAGGGGGAAT  
TTTACAAAGAACAAGAAGCAGGCATCTGCTGACATGGGGACTGAAGTCAGGCGCTAGGC  
AGCGGGCACTCTGCATCTTATCTCTGGAACATAGATCCTCCTTGACAGCCTTGGGTGTCA  
GGCCGGGCTCAGGCGTAACTCGTGTCTTGGATGGAATATGGGAGTCAGGAAGAGATAGG  
GAAGAGGGGACTATAAATTCAGCTTTTACAGGCTCAGGTGCCAGGAAGGGAATAGGGAGGA  
GGGAGTGACAACAGGCTCCTATCACGAGGCCATTTGGCCTGTGAGGGAGATTGTGAAGGG  
CTCGCTTTCTCACGGGATGGTCTCTGACAAACACCTCACTCTCTTACTCACTCTAACCCCTA  
ACTCTTTTACTCTCTTCTCTCTCTGTCCCTTCTCTCCCCAATCCCCTCCCTGCTCTTTTT  
CATGGGTTTCATGGCTGGCCTCTACTCCTCTCCCCTCTCCCCTCTCCCCTCTCCCCTCTCC  
CCTCTCCCCTCTCCCCTCTCCTCTCCCCTCTCCCCTCTCCTCACTCCTCTCTCCCCTC  
TCCTCTCATCTCCCCTCTCCCCTCTCCCCTCTCCTCTCCTCTCATCTCCTCTCCTCTCCT  
ATCTCCCTTCTCCTCCCCTCTCCCCTCTCCTTCTCATCTCCTCTCCTCTCCTCTCCTCT  
CTCTGTTCTCTCCTCTGTCTCTCTCCTTTTGCTTCTCCTCTGAGAAACCTACTCTGATT  
ACAGCCCCCTCTTTGGTGGTTTGTAGATAAAATAGGGCTCAGATCCTGGCAGAAAAGTGTAG  
AGAGCAAGGGCTGTGTGTGGACAAGTAAGGACAAAGAAACTCAGGGAGATCCAACCTGTCC  
ATCCCACGGTCTCCTTTCTATGTGCAGTCTTCTCCTGGGACACCAGCTTTGCTTACTGGCA  
GTCTCCCTGCTTGGCTTCTTGGCTTGCTGGTGGCTATGGTACCTGCTGGAGATCTGGTA  
CAGAATCAAGCCTCACCCAAACTCAGACAAGAAATGAGTTAATTTACCCAAAAATATGAAC  
TGTGTGGCTTTTCTGTATAAATCCTTTAGCTGACAATAGCTGGGGCCTTAGCTAGAAAAT  
GCTCTGGAATTTGTCTAAGCCAAATCTCTTTTAAATAAAAAGGCTCTAATTTACTTAAAGC  
AAAACCTTAAGTCGTGTGCAAAACCTCTAAACCCAAGACCAACACCAGGATAGTTTTCC  
AGGGGTAGAAGCCATCAGATGAGTTAGCATTCTCCCAGAGGAATCCAAAGGGGAAGAACA  
GCTTGGCACCTTTGTGACCTTATTTACACAAGAATTTGAGGAGTTTCCACTTGGTTCCAA  
CAAACCTAGCCATTTCCAGGAATCGAAAACCTGAAACCTACCTGACTACAGCCCCCTCTTTG  
ATGGTTTGTAGATAAAATAGGGCTCAGATCCAGACAGAAAAGAGTAGAGAGCAAGGGCTGTGT  
GTGGACAAGTAAGGACAAAGAAACTCAGGGAGATCCAACCTGCTCATCCACGGTCTCCTC  
CTTCTATGTGCAGTCTTCTGGGACCCAGAACCTCACACCTCATGTCTCCTCTCAT  
AAACCTCTGAATCTGAATTTCCAGTTTGTAGATAAAGACGTTCCCTAAGAGGAAAGCCATC  
ACAGAAGTGTATTGTGCCACCAGATCAAGGTCACCACCTGCTGAGGTAAGTGAAGGGTGTCT  
AGCTTCAGCTTGTTTGATAATCCAAGATGTGTGATAGCATGAGGAGTGCTGTCTGACAC  
CAGGAAAGGAGAGCTCAGGTTTGTACTCAGGGAGGATCCTGGGCACAGGAGTATCTTTCA  
ATGGCCATTTTTTGGACCACAGAACATCCCAAAGCAGAGGAGACAACCCTACCTTCCAC  
CTGTGTTTTGTGGACCATGCTTGTCTTCTGGAGCAGTCAAGCTTGGAGAAAAGATGCCAGG  
TTGGGATACCTCAGATGCCCTTGGAGTTTGTGCTGTAGGCTCTTATTTGTCCCATGGAGA  
TAAAGTCCAGATCAGAAAACAGCCACAGCAAGCTTGGCAGTATCATGTTAGGCCCTCTA  
GTTTTCAAAGATTCCCTCTGCCTCTGTGACCTGTTACATAGAAGGGCCTTTTTGTAGTT  
CTTTCTGTTTCTCTCTTGCAGTGTGCAAAAACAATTTGCTTCATGCATTCTGGACTTTCAC  
TATAGTATGAATTCAGCAGTTTCTTTTCTTTTTTTTTTTTTTTCATGACCCAAAAATATTT  
ATTTTAAATGGTTGGCACTGTAAGACTGTAGGAAACTACCAAGCCAGAATTTGGTGTCT  
AAAAACTATTTACAACCTTAGCAACCATATTTTCATATTTTTACCAAGTTAACAGAAAA  
CCTTGAATTGATATTTCACTTAGACATCATAAAGTATTCCTAATTACATTTGAATGATAT  
TGACAAAAGTGGATGGAATAGATAGAAAAATAAATGACTAT

**Tyropb Truncated (2873 bp) :**

GTGTTGGCTCTGA

CTTGGATGGTGCCTGGTGTCTTGGCTGTTTCATGGCACTGGATGGTGCCTGGTGTCTTG  
GCTGTTTCATTGCACCTGGATGGTGCCTGGTGTCTTGGCTGTTTCATTGCTGTTCTGGA  
GACAGGACAGGTGTGGGAAACAGGATAGTAGAAAACCTGGGAAACAGGAGAAAAGATTTAA  
AAGGAGAAACCATAGCTACCTCTGGACATGCTAACACCACCCAAAGAGAGTAGTTAGCAT  
GTCTAGTACCTACTACTGTGCCAGGCAGAGTTCCTAATGATCCACAGAAAGTCTCTGGA  
GATACCGGCCTTGTGTCTCTGTTCCGGTCCCCTGCTCTACTTCTGCTCATTTAGCAGA  
GGGAACCTTGACCCCCAGCAGGGCCAGCCCCCTAGTCCCCTTCCCATGGCCACACAAA  
GGTCTTGAGCTCAGGCTAGCTCAGGGTTGTATTAAGAGGCCCACTGTGCCAGAGAGACC  
CTTTCCACCCCTCTAGCTCTAGACTTCAAGAAAGAACTTTTGGGGCTGGAGAGATGATTA  
AGAGCACTGACTGCTCTTCCAGAGGTCCTTAGTTCAATTTCCCGCAACCTCAGATG  
CACAAACCATCTGTAATGGGATCCGACACCCCTCTTCTGGTGTGTGTCTGAAGACAGCTGCA  
GTGATTTCAATTTAAATAAAAATAAATAAATAAATCTTTGAAAAGGAAGAAAGAAGCTTT  
TGGGTTCTTTAGAAACAGACTCAGGGCAGTAGTGGCTGTGATTATCAGAGACACCTCCC  
CGACCCCAATTTCTAGAGTCCCCTCCTCCCAGAGTGGCATTAGCTTCTGTCCCATGACTA  
CTATCTGGCTTCCCCTTTCTCTTGCACCCAGGGTGTACAGGGCGTGACATACAGTGGGG  
GGTGGCAGGGGGGGAGGTTTCTGCATCTGGCTCTTGCCTAAGGGCTCCAACCTCAGG  
TTCTCCTTCTCCAGTTCTCGATCAGGCTCCCCTGAGGACTAAAATAGTCCAACCTCC

TCTCCATGATCTCCCTCTGCTCTGGCTCCCGGTTGCTCCCTGCTTACCAGTGTAGCC  
TAGCCAGCCAGCCAGTAGTCACTACCGTGCCACCACCTGCCTCCCCTCAAAGCCCCAA  
CTCTGTGTCTGTGGTGTGCACATCTGTTTTCTCTCTGTATCTTTTTTTTTCTTCTTCTAA  
CAGTGAAGTGGCCATCTTTAGGTCCTGGGTCTGTCTGTCTTTCTTTGCTGTGTGGCTAT  
GGGCAAGTGTCTTTACCTCTCTGTAAAAATGGGAGAAAGGCATCAACCCCTGGTGAATACT  
ATGAGGACTCAGTGACGTCAACATGGAGCAGTCTGTGAGTGTCTCTGCTGGTGGCTC  
TGTCTTCCACAGCCTGTGACCATGATGGGAGGTAGATATAGAATAAACCACGGCTGA  
TACTTACAAGGCTAATGTGGGTGGATCCTGCTCTAGTAATGCTGGTTGGCTGAGACCCC  
ACGACCCTGCAAAGAAAGTACGATTTAATTCTCAGTCTTGTGGATGAAGAAATCAAGGCC  
CAGAGAAGCTAAGCGACTTGGAAAAGGTTGCCAGCTAGGAAGAGGCTGAGCTGATTTCA  
ATGACTAGCACCCACAGTCCCTCCTGTTCCAAGATTTGCCCTCTATCTGGAGATGAAGAT  
GAAGACCTGACATGTGTATCTCTCTCTTTCTTGTTCAGCCCATGGGACGTGGCCACAG  
CCCCCTGAGCTGCATTTCTTTCTGGCCATGTCTATACGTTCTCTCTCCCTGCTGTCTG  
CCCTCCTCTGCTGCCACCACCCACCTCACACTTCTCTCTTCACTGGTTGGACGTACA  
CCAGGTCCACCAGCCCCCTGGACTGTGGTGTCCAGTGCATATCTGGCCACCATGGGGGCT  
CTGGAGCCCTCCTGGTGCCTTCTGTTCTTCTGCTCCTGACTGTGGGAGGTGAGTCCG  
GGGGGCTTCTGTGGATGCCTCCTGTGTCCTCAGCTCATGTTGGGGCCAGGACTAGGCAGA  
GAGCAGGAAGGGACAGCACAGACAAAGGGGAAGGCTGGGCAGAAAGAGGTTCTCTAGAG  
CCTGTGGGTTTACCCTGAGCTAGAGGCCCTGAGATTTGGAACCTGGTAGTATCAGTAGG  
GGGACATTGAGCTCACAGATATACTCACATGGTGGTACGACCTGAGTCCGTCGGTGGTG  
CTGTGAGACTCAGCTCTTTCCAACCTTCTTACCTTTACATCCACTGCTGTGTGCCCTCAAT  
TTACATCTTTCTTTGAATATAGAATCACATATAGCCAGGCTAGCTTCAAATTTGCTAC  
GTAATTGAGGATAACCTCAACCTTTCTATTTCTGTCTCCACCTCTCTCAGTTTACCTGT  
TCTTTTCTCCTTAGGATTAAGTCCCGTACAGGCCCAGAGTGGTAAGCCATAATACCCCCG  
ATCTTTCTCTCTTCTCTCAAAGACCTCCTCAGGCCACCCCTTCTCTCTAGCCCTCTT  
TGTGTAAACCAAGCCCTGATTTGTTAACTGTCTCCCTCTTCACTCTCTGAGCAC  
TTTCCAAAGATGCGACTGTTCTTCCGTGAGCCCTGGTGTACTGGCTGGGATTGTTCTGGG  
TGACTTGGTGTGACTCTGCTGATTGCCCTGGCTGTGTACTCTCTGGGCCGCCCTGGTCTC  
CCGAGGTCAAGGGACAGCGGAAGGTGAGTGGGGCTGGAGGGGGCTGGTCTGGAACACTTT  
GGGACCTGGTGGGCAGTGGATACAGTGAAGCGTCAAGGTCAAAATATCAAAGGATGG  
GAGGGCTGGCTTGTGTTATTGTTTTGTTTTGTTTTCTTCC

Utx:

ACTTTGAATTCTGTATTACACATTTAGTACTTTGTTTATCTTATAATATCTAATCTCTCT  
GTGTTTGTTTTCAAGACAGGGTTTCTTTGTGTAGCCTAAGCTGGCTTCAGACTCAGAGAT  
CCATCTGCCTCTGCCCTTTGATTGCTGGGATTAAGGTGTGAGCACCCATGCTGACCATA  
GCATCTAATCTATAAAATGTCATTAAGTGGTTTCTTTTATACTTTGTGTGTGTGTGTG  
TGACATGCGCTTGTGTTTGTGTGATGGTAAGCCTGTGAAGGTGAGAAGACAACCTTGCAG  
GAATCAGTTTTGGAATCTGGCAAAATTTTGAAGGACTAAGGTTGGTTGCCCCACCATAA  
AGTGGTAGATATGATTTGTATGATGTAACACAACACCAGGCTCCTATTTTATATCACT  
TTGCCTTACATTTTTAATGCCCTTCTTTGTAGCCTAGCATGACCTTCAACCTAGCACCT  
TACCAACTGAGCTAAATCAGCCCAGGTTTTTTTTTATAGTTATTTATTTATTTATTTA  
TTATTTATTTGACATACGGTTTTCCCTGTGTAGCCCTGGCTGTCTAGAACTCACTCTGT  
AGTCCAAGCTGGCCTTGAACCTCATAGATCCACCTGCTCTGGCTGCAAGTGTGGCATT  
AAAGGCATGTCACCACCTGCCATAGTAATAATTTATTTATAAAAACAAAATTTTTTCC  
ATTTTGTATGCTATAAATTTAAAATTTGCAATTAATTTGACAGTACTGAGAAAGGCTCC  
ATGCTTATTTACATAAATTTGACAGCTAAACTATGTAATGCAAAAAAATTTACATAGA  
CATGTAAGACTTATTTTATATGGACACTGCATGTTTGTGAGGATAAACTCTTGTAGTT  
GGCCTGGTTTGGCCAGGCATGATTGTACGTGTCTATTATCCAGAACTGAGGAGTCTGAG  
GCAGGAGAACACAGAGGCCAGCCTGGGCTACAGAGCAATAACCTGTTTATAAAAACCTGT  
GCCCCAATAAACTAGAATTACTCCACATCAAAAAACAACAGCTTTGGTPTTAGAGGTACAG  
AGCTTGCAAGGATCAGAACCAGCTGTGCTAGGCTAGACTCCAACCCCTCCCTATCACT  
TTATTTCTAAAATCTAACCTTATTATTAAGGCGAGGAAGGCACTCAGACTGAGTTGCTG  
TTATATCACTTCTGAAAGGGACTAAATCAGGAACCAGTAACCTTTGGGGACGTGGCCAAA  
TACTGACAGGTTTGAATTTCTGTTTGTGCAAGTGTGACATGTTGTTGGGGCCAAAAATCT  
CCCAGGTTTTGAAGGTCACCATTTGTGACATTTAAACAATTCGTATGTTAATTTAGCTATA  
GAAAATATTCAGTCTCTGGTACTCACTCAGTCAAGTAAAATAGAACACCCATAGAACATGT  
TTTTGTAAGGTTGTAATTTAAACACGAAATATAATCCATACAAAACCTAGTTTATTCATCTAG  
TTACTAGTCTCCAGGCAACAATTTAAAGCTCTGTCTGTCTGCAAAAATAGTTGGGACTTT  
TATAGTCTCTCATGTAAGAACAACAGCTAGGATTTACTGACTCAGACTTATATATCTGTA  
AATCTAAAATTTAAATATAACCTTATTGATTACAGGTGTAACCTTATATAAAAACATATAAAG  
CTTGGTTTATAAACGGATCTTTTCTTATATAGTCCATTTACTAATATTTTTCTATCCCAA  
AGACTGGAGGTGTGATGAGATACATCACATTATATCTGCCTTTTCAAATAGTTCGATGGA  
AAGTTTGGTCTATCTCCTGATTATACTATGGGTCAAACACCAGACTTATTTGTACCTGAG



GCAGCAAGCAAGCAAATGTTACTGCTAAGGGTTTCCCTATGTAGTGGAAAGCAGAAAAAGGCC  
TGGCAGGAAGCTGTGTTGAGGATTCTATTTCTCTAAGGCCAGTTACATACAGCTCCTTAC  
TCTTCCATGGAGTACCCACTGAGATGACAGCAACAGAACCACCAATTCTGAAATCCCCCT  
CGACAAATTTCACTGTTTCTGTTTTTTCTTTATAGTATAACGAATTAAGTCTAGGGCGT  
AGGGTATATGCAAGCAGCAGGAATATCTGGCCCCGAAAGTGCTGCCAACAGACAGACCTTT  
GGCGGTGGGGTGGCGGGAGCCAGCGCCAGACCCCCCTGCAGGGCACTGACTCTTCATTCC  
TCCCTGCCTGGGGTGGTGGGGGGGGTGGGAGACGTTTTTCCCCTCCCCTTTTGAAG  
GGTATGGGGCTTCGCGTGGCCTTGTCTAGGGCGCGCCAGGCTGCAGGGTATGAAGCCG  
GCTGCTGCTCCTCTGGCGCACTCCTCGTGGAGGCTATTATTTCTAGCAGTGCGCCCTTCTT  
CCGAGGGCAGAGGTCTGGGGCCGAGTGTTCCTCCCCCGCACTCAGCTGGTGTCCAGCCC  
TGTGGGATCGATATTTCCCGAGTGCAGCGAGCGCTAGCAGGACCACCGAAATCACAGTCT  
TGGCCACCCTAGGGCTTCCGGGCAGCCAGAGGCTGTCTTAGGCTTTCTCGTTGGCGCTC  
GCTACAGGCGGTGCCGACCTCGCCAGACTGAGCACTCCCCCCCCCCCCCGATCCCCAC  
CACGGCTCCCGAAGGGACAGCAGCTGGACCCCTCCATTCTCTGCTGTGTATTAAGTAG  
CAACAACCTAACCGGTGCTCCCACTGGGTGACAACCCTACTCCGACAGACGTGCCCTATC  
AGCCAAACCACCGACCAGAACTGGCGAGCATCCCGCTCTCGATCTGTGGCGGCCCTCGGTG  
GGCGGGGCTAAAGCAGCTAGCAAGTTAAGTGGAGCCACGACTGACGCGAGTCAACAAAGT  
TACGCGAGGCGAGGGGCTGCTCTGGTTGGCTGCGCCGAGCGGGCTGTGAGGGGGGGGTC  
ACGGCAGCGCGTGGGGTTCGCTGTGTGACACAATTACAACAACCTTTGTGCTGGTGCCGG  
GGAAAGTTGTGTCTCCTACGAATCCCCCCCCAGAGCTCCCGCTCCTCGCGCGCTCCGGCCA  
TTCCCGCCGACCCTGCCTGTGGCTGGGGCTTCCATCCCCCGCATGTGACCCCTACAGCC  
GAGCCGTGCGCGCTCCGAGCCAGTGGTTCACAGCCCTCTGCTGCTCCTGCCTTACCTC  
TACCCGCTTAGGATTTTTCTGCTGCCCTCTCGCGGCAGAGGAGGAGGCAGAAATAAAGT  
TGGTGTGCCGGTCTTGTGCGGAGATTGGAGGCGTCTTGGCGGCTCCGGCCCCGAGAGGG  
GGGGTGTGCGGCTGGAGTTGTGAATTCGCTGCGTTTTCCATGAAATCCTGCGGAGTGTG  
CTCGCTACCGCCGCGCCGCGCCGCGCCGCGCTTTTCGGTGTAGAGAAAAGAAAATG  
GCGGCGGGAAAAGCGAGCGGCGAGAGCGAGGAGGCGTCCCCCAGCCTGACAGCGGAGGAG  
AGGGAGGCGCTCGGCGGACTGGACAGGTACGGGGAGCGGGCACTCGCCCGGGCGGCTCGG  
GACAGGCTGGCGCACTCTCCGAGAGGGCCGAGCGCGGCTAGCCTGTGGCGGCGCTGGG  
CGGGCACCTCGGCTGGCGCTCTCGCTCCGCTGACGCCCCGGGCTCGGGCTTGGCAC  
GGACGGGCTCGGCGCCGATGCCGGGGCACTAACGAGCGGCGTGTGTCTTTCTCCGCGCCG  
CCTTTTCGGGTTCTGTGAGGTTTCATGAAGATGGCGCCAGGATGAAGGCCCTGCTGGGCAA  
GGTAAGGCAAACCGCGGGCCGGAGCGCGGACGCGGTCTCTCGAGCCAGAGGCGCGCTCGC  
CTGGGGCACCGGGCCGGGTACCACTCATTTGTGGCCTCGAAAGACGGCCGAGGGGCTTC  
CGAAAACTATTTCTGCTACTGCGCTCCCCCTCACCCCCCTGATACCTCGCTTGTCTCT  
TGAGAGATCACTTCTTGGAGCCAGAGGACAGAGGCAGT

**Uty:**

CCTTAAACCCCCAAAGAGTAATTTAAAAGGGTTTTTTATTATCAAACACCTTTTTCTGTTT  
TAAGATTCTCTATGTAGAGTAGGTTGCATTGGACAATTATCTTTCTGGCTTACTTACTG  
AGTTCTGAAATTTGAAAGGATTACCATPATTTCTTTGTGGCAAATATTTGTCAACCCCA  
GAACTCAGCAGATACAATAGTGAAGAAAATAAGTCAGCTCTTGCTCCCTCCCTTACCTCT  
ATTTCTTAGTCTTTTGTCTCCCTGCTTCCCCCTCTCTCCCCATCCCCCTTCTTGCTCTCT  
CTATGTGGTCAATGGCTGCCTTCTGCTTCTACTATCTACACTCTTGGCTTTCTTACAA  
TAAATGCTTAAAACCAAAAAATAAAAAATAAGAAAAAGCTCAGCAGAGGAGAATGAAAG  
GATGGACTACTACTTTCAGAACTGTTTAAACCTGAGAATTTTGGAGAGAAAGATTGTT  
TAGTTTCAACCCCTTACAAGGGACTGAGGTACATATTTTACATATTAAGCAGTCCGCGCC  
TCCAGATTCTCCTAGCATCCCTCAGTCCCAACCTGGCATTCTGTCTCAAACCTAAACTT  
TTCAGTTCAGAGGCTGGGCTACCTTTCCCCCAGAAGCTTCTCCCTATATAATCCAGACAT  
TTGGACAAATGACTCCCCCCCCCATGTCCCCCTCCTTTTCTCTTTTCTCCTCTTCTTCTC  
TTCCTCCCCACCTGTCTTACTCTCTTCTCTCTCTCTCTCTCTCTCTCTCTCTCTCTCT  
TCCCTCTCTGTGTACATGAGCTTCTCTCTCTTCTTCTTCTTCTTCTTCTCTCTCTCTCT  
GGGGCAGTGAACCTGCCCCAAGAGCAGCTTCCAATAAGCCTGCCTATATATAAAAATATT  
AAAGACCTGTTCCACAATATCCAACCTAAAGCAAGCTTTATTTAAACTGACTAGGAAGTT  
CAACACTGACTACATTCATGCCAGGATTCGAAGAGAAATGGCTTTGAATTAATAATCAGT  
ATGTGATCATGCAAAGAAACCTCTACAAATCTATGAACTTTCCATATTTGTCCAATTAGG  
GGTAAGCATACTCCTCACTGACTTCTGTCTGCATATTTCTCACCTGTGTGTGATCAAG  
CATATCCTGAGCACTTGGGGCAACAAACCTTGTCTATTGAACTAAAAACAACCTCCAGTA  
TTCTGCAGTATTTGTCTTCTTAGGTAAAGTGTAGCATACACATTAACCTTAAAGAAATCCCA  
GAGTGCATTTTTTGTGTTTTGTTTTGTTTTGTTTTGTTTTGTTTTGTTTTGAGAGAAAGTTTT  
TCTGTGTAGCCCTGGCTGTCTTGAACACTCACTCTGTAGACCAGGCTTCTCAAACCTCAGA  
AATCCACCTGCTCTGCTCCCAAGTGCTGGGATTAAGGCGTGCACCACCACGGCTGGC  
TCTGACTTTTTTTTTTTTTTAAAGAGTTACTTTATTTATATGAGTACACTGTTACTGTTTTT  
AGACACCCCAAGAGGGCATTGGATCCCATACAGATGGTTGTGAACCACCATGTTGGT

GGTGGGAATTGAACCTCAGGACCTCTGGAAGAGCAGTCACTGCTCTTAAACCATACCATGCA  
GTTAGTATCTGAGAGTAAAGTAGCAGAAGCTATACACCGTCTGAGAATCAATTCCTGTAG  
TGTAGGCTTCTGGAGTCCCAGAAACTGCTTTTTCAAGTTAAATTGGGTGCAGGGAGGGAGG  
GGGAGAATAGGTCTAATTGTTTTCTGAAACCTTTTTGGCAGAAGGGTAAAAGATAAGTCAGA  
TTGCCCTGTTTTTTGCACTCTTATGGCTTCCAGGCTCTGCAAAGTGTTTTAGAAGCTTCCTAG  
AATTTGTTTATGGAAGCTTTTGAAAGACTTAGACATGTTTTGTGGACCTGGTTTTGGGG  
TAGGGAATTTACTTGAAGAGGGATTAGGTAGTGTGTGCTAGCCAGTCTTCAATACAATTC  
AAGTTTTAAGGTCATCTTAGATTTATAAAATATTTGTGTTGGAGACTTGTGATACTGGTTTTC  
TGAGATGGGGAAC TAGGTTTTCTTGTGAAGGTCCAGGCCAGTAAGTAATGGTAATACAA  
GTCAATTCAAAACCTCTGAGAACAGCAAAATTGGAACCTGTCTTATTATATTTTTTTATTA  
TTGTATTATATATAAAATGAATGCTCCTCTTACAAAGTGTTGGATCATATTTACAAATTTT  
AGCTACAACAACCAAAGGTCAAAAGAAATGGTATTGTTCTCAAATGGTTACTGCATCTT  
CAAAATGCAATGAGGGATTCCTCCCGTCTTCCCTCCCTCCCGCCCGCCCTCACGTCACCTCT  
TGCCCCCGCAGGGATAACCTTTGTGAGGGACTGTTCAATCAGTATGATCTGTTGTTTTAAG  
GACAAAAGTCATGTGACTTTTTATAAAAGTTTTTTTTGGTTTTGATGTGGTTGAGTGGATGGGTA  
ATTAATGAGTTTAGCTATGGTGGTGACAAAAAAACACGACCCAGTTACTCATTTGAGGATG  
ATTTCAATTTTAGCTGAATACATTTTTGTTTTCCCAACGTGTGTGTCTATTACTTCAAGATC  
TTAATTTTAAAGTTTGTGCTAGAATTAGTATTAAGGAGCACCGATTCTGGGAACCTAACAGA  
AGGTGTTCTGTAAGGCAAGAGGAAAATTTTTTTTTTTAACTATTTGGTCTCTAAATGGCT  
TTCATGTGCCATAAAACCGATGTTTGTAGTATTTTTTTCTTAGTGCTCTTTGTCTTTGT  
GAGATCAGTATAGCAATTAATGAAGGGCTGGATATCTAGTGTGGAATAAGAAAGAT  
TACAAAAGCATACCTAAAACATAATTTACTGTGGTTCGGTAGGTAGACTCTTAGGCTGACA  
TCACGAGCTAGCGAAGTAGCAAGTTTAGCTGCACTGGTGTGACGCAAGTCAACAAAAGT  
ACGTCGGATAAAAACGGTTGCTTCCATTGGAAGCCTGGCTTTAGGGAGAGGTTATGGAC  
GTTACGTGCGGTTCCACTGACGGTATTATAACAACCTTTATGCGGATGCTAGCGAAGTTT  
GATATTTAAGAACTTCGCTTAGGTTCTGCAACAATGAGTTCCTCTTGCGTTCACCATCT  
GCGTGGTAATGTGACCAGATAGCCTCTGCGGCTTCTCTTTGCCAGTTTTCCATGAAATC  
TTACGGATTATCTCCTACTGCTGCCC TAGGTAATGAGGAAAAGAAAATGGCGCGGA  
AAAGGCTAGAGCCGAGGGCGAAGAGGGGTCTTCACTCAGTCTCACAGTCGAAGAGAAAGGC  
GCTTTGTGGATTAGATAGGTACGCACTGCTAATACTTACAGGTTGTCTTTCTCTCTCCGG  
GTTCAAAGACTCTCCAGGAGGCCTGACTGCATCTTGCTTGCGGTGACGACTCGCTTTCCG  
CCTAGCACTGTTAACAATGTTTTGGGAGATTTTTTACTGATGTCTTCTGTGATCATTAA  
CAAGAGCCATGTATTTCTTCCACAGCAGCTTCTTCCGGTCTTGACCCGATGCAAAGATG  
GCGCCAAGATGAAGACGCTGTGAAACAAGGTCAGCACTGTTTAAACATAATTTACTTATA  
TTTTTCTCTAAGCTTTTCACTGTTCCAGCCTGGAGCCTCTCCCTACTCTGAAAGTGTCT  
CATTATAGCTTTTAGGGATCTTTGAAACTTTTTTTTTTCTTCCCCGTTTCTCCTTTCTTG  
GCTTACTTTCTGATAGTTTGGAGCCCTGCCTCAGCATAACAGCCAGAGCACTGCTTATT  
TTGCAGTTTTTCTGAGGTCAGCTATATCCTCCAGTTACTCATCTCAAGTTATGAGAAGAC  
GCTTGGTTGTTGCAGCCTCTTGTGATATACACACGTTTTTATTATTTCCCATAGGGACA  
AGTTATAGGTAAGGAGATAAAGAGTTTCCGTACTTAAAAAGAATTTTTTACGATGCAGTA  
GTAATACTATGCAGAAATAACTGAATTCAGTTTTGAA
