# Supplementary material
Source: PubMed Central journal article supplement (PMC1323176)
Supplement: pnas_0507902102_2.pdf [file pnas_0507902102_2.pdf]

**Table 1. Primers used for quantitative real-time RT-PCR of MT-MC1-responsive genes**

| <b>Gene name</b>   | <b>Forward</b>            | <b>Reverse</b>             | <b>Product size</b> |
|--------------------|---------------------------|----------------------------|---------------------|
| Aldh1a1            | CACTGGCCGACTTGAAGAT       | CCTCAGTTGCAGGGTTAAGAAC     | 105                 |
| Anxa1              | GCTATGCTAAAACTCCAGCTCAG   | CTGATTTGTTTCGTTAGATCTTGTTG | 121                 |
| Ccl6               | ACACTTCTTCAGACTGCTGCTTCTC | GTTCCCCTCCTGCTGATAAAGA     | 124                 |
| Ccl9               | CCTGTCCTATAACTCACGGATTCAG | CATCTCTGAACTCTCCGATCACTG   | 147                 |
| Ddx3y              | GGTCATAGTCGTTGGAGTGACA    | CCAGTTGCTTCTACTGGTATATCATC | 149                 |
| Eif2s3y            | GTGAAAGAAAGCCAGGCTAAAGAAC | ACTGAGCAGAAATTGGAATAATAGG  | 100                 |
| Fcgr2b             | CTACTGAACAGGATCTCGTTCTTCC | CTTTGCAGTAGTAGTCCCCACTGT   | 118                 |
| Gdf3               | CAGGACTTATGCTACGTGAAGGAG  | TGGCAGACAAGTTAAAATAGAGGAC  | 145                 |
| Gp1ba              | GTAGAGAGAAGGACCGAGTCATAGC | AGGCTGGTCACTTTGGAGATACTAC  | 148                 |
| Lmo2               | TGGGTGAGGCATTTCTTAGG      | GCCTATCAGGATGGCACAGT       | 207                 |
| Pik3ca             | AGGCAACCGTGAAGAAAAGA      | GTTCTGGGGAAGACACGACA       | 215                 |
| Utx                | CTTTCGGTGATGAGGAAAAGAAAAT | GCCATCTTCATGAAACCTCAC      | 149                 |
| GAPDH<br>(Control) | TTCACCACCATGGAGAAGGC      | GGCATGGACTGTGGTCATGA       | 236                 |

Sequences of primers.
