# Supplementary material
Source: PubMed Central journal article supplement (PMC1323176)
Supplement: pnas_0507902102_3.pdf [file pnas_0507902102_3.pdf]

**Table 2. Genes regulated by MT-MC1 in 32D cells**

| GenBank Source                            | Gene Symbol | Functional Category/Gene                                        | Fold Change | c-Myc Target | Role in Cancer |
|-------------------------------------------|-------------|-----------------------------------------------------------------|-------------|--------------|----------------|
| <b>Signal Transduction</b>                |             |                                                                 |             |              |                |
| X04648                                    | Fcgr2b      | Fc receptor, IgG, low affinity II b                             | ↑ 16.3      |              | +              |
| U15209                                    | Ccl9        | Chemokine (C-C motif) ligand 9                                  | ↑ 12.9      |              |                |
| U91967                                    | Gp1ba       | Glycoprotein 1b, alpha polypeptide                              | ↑ 12.4      |              | +              |
| AH001995                                  | Anxa1       | Annexin A1 (lipocortin 1)                                       | ↑ 11.1      |              | +              |
| X13335                                    | Adam8       | A disintegrin and metalloprotease domain 8                      | ↑ 8.1       | +            |                |
| M58004                                    | Ccl6        | Chemokine (C-C motif) ligand 6                                  | ↑ 6.7       | +            | +              |
| X93328                                    | Ly71        | Lymphocyte antigen 71 (Emr1)                                    | ↑ 6.3       |              |                |
| BC056450                                  | Tyrobp      | TYRO protein tyrosine kinase binding protein                    | ↑ 5.3       |              | +              |
| Z48589                                    | Tcrg-V2     | T-cell receptor gamma, variable 2                               | ↑ 5.1       |              | +              |
| AK089836                                  | Tgtp        | T-cell specific GTPase                                          | ↑ 5.0       |              |                |
| L41365                                    | Daf2        | Decay accelerating factor 2                                     | ↑ 4.0       |              | +              |
| L41366                                    | Daf1        | Decay accelerating factor 1                                     | ↑ 4.0       |              |                |
| M90316                                    | Lsp1        | Lymphocyte-specific protein 1                                   | ↑ 4.0       | +            | +              |
| U03279                                    | Pik3ca      | Phosphatidylinositol 3-kinase, catalytic, alpha polypeptide     | ↑ 2.7       |              | +              |
| BC006948                                  | Lcp2        | Lymphocyte cytosolic protein 2                                  | ↑ 2.1       |              | +              |
| D87747                                    | Cxcr4       | Chemokine (C-X-C motif) receptor 4                              | ↓ 2.2       |              | +              |
| L05670                                    | Clu         | Clusterin (apolipoprotein J)                                    | ↓ 3.3       |              | +              |
| L06443                                    | Gdf3        | Growth differentiation factor 3                                 | ↓ 7.9       |              | +              |
| <b>Chaperones, Trafficking, Transport</b> |             |                                                                 |             |              |                |
| AK050042                                  | Aqp9        | Aquaporin 9                                                     | ↑ 5.9       |              |                |
| AK088102                                  | Aim1        | Absent in melanoma 1                                            | ↑ 2.7       | +            | +              |
| X16133                                    | Prg         | Proteoglycan, secretory granule                                 | ↑ 2.3       |              | +              |
| AJ002306                                  | Syngn1      | Synaptogyrin 1                                                  | ↓ 2.9       | +            |                |
| AF049125                                  | Rcn2        | Reticulcalbin 2                                                 | ↓ 3.5       |              |                |
| <b>Nuclear Factors</b>                    |             |                                                                 |             |              |                |
| BC021453                                  | Ddx3y       | DEAD (Asp-Glu-Ala-Asp) box polypeptide 3, Y-linked              | ↑ 12.1      |              |                |
| BC057880                                  | Lmo2        | LIM domain only 2                                               | ↑ 4.4       |              | +              |
| AF269248                                  | Hemgn       | Hemogen                                                         | ↑ 4.3       |              | +              |
| U86405                                    | Bin1        | Bridging integrator 1                                           | ↑ 3.5       |              | +              |
| AK077543                                  | Spag7       | Sperm associated antigen 7                                      | ↑ 2.3       |              |                |
| AB014494                                  | Arntl       | Aryl hydrocarbon receptor nuclear translocator-like             | ↓ 2.3       |              |                |
| M20824                                    | Mdm1        | Transformed mouse 3T3 cell double minute 1                      | ↓ 3.5       |              |                |
| <b>Biosynthesis</b>                       |             |                                                                 |             |              |                |
| AJ006584                                  | Eif2s3y     | Eukaryotic translation initiation factor 2, subunit 3, Y-linked | ↑ 13.1      |              |                |
| AK032283                                  | Piga        | Phosphatidylinositol glycan, class A                            | ↑ 3.5       |              |                |
| AK077566                                  | Hccs        | Holocytochrome c synthetase                                     | ↑ 2.9       |              |                |
| BC022110                                  | Alas1       | Aminolevulinic acid synthetase 1                                | ↑ 2.5       |              |                |
| AH005589                                  | Gamt        | Guanidinoacetate methyltransferase                              | ↓ 3.1       | +            |                |
| AB049643                                  | Mrpl16      | Mitochondrial ribosomal protein L16                             | ↓ 4.3       |              |                |
| <b>Antioxidative Enzymes</b>              |             |                                                                 |             |              |                |
| AF290914                                  | Stab1       | Stabilin 1                                                      | ↑ 4.1       |              |                |
| AK035425                                  | Ltb4dh      | Leukotriene B4 12-hydroxydehydrogenase                          | ↓ 5.6       |              |                |
| M74570                                    | Aldh1a1     | Aldehyde dehydrogenase family 1, subfamily A1                   | ↓ 9.2       | +            | +              |
| L06047                                    | Gsta4       | Glutathione S-transferase, alpha 4                              | ↓ 9.6       |              |                |
| <b>Uncertain Function</b>                 |             |                                                                 |             |              |                |
| BC053433                                  | Utx         | Ubiquitously transcribed tetratricopeptide repeat gene, X chr.  | ↑ 11.6      |              |                |
| Y09222                                    | Uty         | Ubiquitously transcribed tetratricopeptide repeat gene, Y chr.  | ↑ 5.4       |              | +              |
| BC018296                                  | Erdr1       | Erythroid differentiation regulator 1                           | ↑ 3.1       |              | +              |
| AJ001616                                  | Myadm       | Myeloid-associated differentiation marker                       | ↑ 2.6       |              |                |
| <b>Unknown</b>                            |             |                                                                 |             |              |                |
| BC024822                                  |             | Hypothetical protein (weakly similar to human GASP)             | ↑ 3.2       |              |                |
| BC056255                                  |             | Hypothetical protein                                            | ↓ 2.6       |              |                |
| C85523                                    |             | Mouse fertilized one-cell embryo cDNA                           | ↓ 4.6       |              |                |

All genes listed here were identified by microarray gene expression comparisons between 32D-MT-MC1 and 32D-neo cells. Genes are listed according to their relative levels of expression in the former cell line. Values represent the average differential expression in three separate microarray comparison experiments. Only those genes whose differential expression varied by  $\geq 2$ -fold in each of three experiments are listed. +, previously identified c-Myc target genes or those implicated in cancer.
