# Supplementary material
Source: PubMed Central journal article supplement (PMC1323176)
Supplement: pnas_0507902102_4.pdf [file pnas_0507902102_4.pdf]

**Table 3. Mouse and human syntenic regions of MT-MC1-regulated genes**

| Gene           | Chromosome | Position (Mb) | Human Syntenic Region | Associated Human Cancers                                                    |
|----------------|------------|---------------|-----------------------|-----------------------------------------------------------------------------|
| <i>Cxcr4</i>   | <b>1</b>   | 128.40        | 2q21                  | Adeno. ca, ALL, Lymphoma, Sq. cell ca                                       |
| <i>Daf2</i>    |            | 130.27        | 1q22                  | Adeno. ca, ALL, Bone tumors, Lymphoma, Sq. cell ca                          |
| <i>Daf1</i>    |            | 130.32        |                       |                                                                             |
| <i>Adam8</i>   | <b>7</b>   | 127.64        | 10q26                 | Adeno. ca, ALL, AML, CLL, Atyp. CML, CML, Lymphoma, Multiple myeloma        |
| <i>Lsp1</i>    |            | 131.18        | 11p15                 | Adeno. ca, ALL, AML, Bone tumors, Brain tumors, Lymphoma, Melanoma, Myeloma |
| <i>Gp1ba</i>   | <b>11</b>  | 70.25         | 17pter-p12            | Adeno. ca, ALL, AML, Bone tumors, CLL, CML, Multiple myeloma                |
| <i>Spag7</i>   |            | 70.26         | 17p13                 | Adeno. ca, ALL, AML, Atyp. CML, Bone tumors, CML, Lymphoma, Myeloma         |
| <i>Ccl9</i>    |            | 83.19         | 17q11                 | AML, APML, CML                                                              |
| <i>Ccl6</i>    |            | 83.19         |                       |                                                                             |
| <i>Anxa1</i>   |            | 19.66         |                       |                                                                             |
| <i>Aldh1a1</i> | <b>19</b>  | 19.98         | 9q21                  | ALL, AML                                                                    |
| <i>Piga</i>    | <b>X</b>   | 154.40        | Xp22                  | Adeno. ca, ALL, AML, Lymphoma                                               |
| <i>Hccs</i>    |            | 159.43        |                       |                                                                             |
| <i>Uty</i>     | <b>Y</b>   | 45.10         | Yq11                  |                                                                             |
| <i>Eif2s3y</i> |            | 45.30         |                       |                                                                             |
| <i>Ddx3y</i>   |            | 45.60         |                       |                                                                             |

MT-MC1-regulated genes often cluster to common chromosomal loci and are syntenic with cancer-associated human loci. Chromosomal assignments for all of the genes listed in Table 2 were determined using the Entrez Gene database (<http://www.ncbi.nlm.nih.gov/entrez/query.fcgi?db=gene>). Of the 47 genes listed, 16 localized to six distinct chromosomal clusters, corresponding to 11 syntenic human regions. Searches of the Mitelman database (<http://cgap.nci.nih.gov/Chromosomes/Mitelman>) showed that 10 of these 11 regions are commonly perturbed in a variety of cancers, most strikingly acute leukemias, lymphomas, and carcinomas.
